# Supplementary material for: Transition Metal Catalyst‐Free, Base‐Promoted 1,2‐Additions of Polyfluorophenylboronates to Aldehydes and Ketones
Source: PubMed Central journal article supplement (PMC8362073; doi:10.1002/anie.202103686), 2021-06-17
Supplement: ANIE-60-16529-s001.pdf [file ANIE-60-16529-s001.pdf]

## Supporting Information

### **Transition Metal Catalyst-Free, Base-Promoted 1,2-Additions of Polyfluorophenylboronates to Aldehydes and Ketones**

*Zhiqiang Liu, Goutam Kumar Kole, Yudha P. Budiman, Ya-Ming Tian, Alexandra Friedrich, Xiaoling Luo,\* Stephen A. Westcott, Udo Radius,\* and Todd B. Marder\**

anie\_202103686\_sm\_miscellaneous\_information.pdf

## Table of Contents

|                                                                                  |           |
|----------------------------------------------------------------------------------|-----------|
| I. General Information .....                                                     | S3        |
| II. Borylation of Polyfluoroarenes .....                                         | S3        |
| III. General Procedures .....                                                    | S4        |
| IV. Characterization.....                                                        | S4-S15    |
| V. <sup>1</sup> H NMR, <sup>19</sup> F NMR and <sup>13</sup> C NMR Spectra ..... | S16       |
| VI. Single Crystal X-ray Diffraction .....                                       | S63-S74   |
| VII. Computational Methods .....                                                 | S75-S107  |
| VIII. Investigation of the Reaction Mechanism.....                               | S108-S111 |
| IX. References.....                                                              | S112-113  |

## I. General Information

All NMR spectra were recorded on a Bruker AC-500 spectrometer (500 MHz for  $^1\text{H}$  NMR, 125 MHz for  $^{13}\text{C}\{^1\text{H}\}$  NMR, and 470 MHz for  $^{19}\text{F}$  NMR) with  $\text{CDCl}_3$  as the solvent. Chemical shifts ( $\delta$ ) are given in ppm and  $^1\text{H}$  NMR spectra were referenced via residual proton resonances of  $\text{CDCl}_3$  (7.26 ppm),  $^{13}\text{C}\{^1\text{H}\}$  spectra were referenced to  $\text{CDCl}_3$  (77.16 ppm) and  $^{19}\text{F}$  spectra are referenced to external  $\text{CFCl}_3$ . The following abbreviations were used to indicate multiplicities: s = singlet; d = doublet; t = triplet; q = quartet; m = multiplet. GCMS analyses were performed on an Agilent Technologies GCMS system (GC 7890A, EI-MS 5975C). HRMS were measured on a Thermo Scientific Exactive Plus equipped with an Orbitrap. ESI measurements were conducted using a HESI source with an aux-gas temperature of 50 °C. Measurements were conducted using an APCI source with a corona needle; aux-gas temperature was 400 °C. Chemical yields referred to pure isolated product. Automated flash chromatography was performed on silica gel (Biotage SNAP cartridge KP-Sil), obtained from Biotage, using a Biotage® Isolera Four Flash system. Unless otherwise stated, all reagents were commercially purchased and used without further purification. The degassed and dry solvents were used.  $\text{B}_2\text{pin}_2$  was kindly provided by AllyChem Co. Ltd. (Dalian, China).

## II. Borylation of Polyfluoroarenes

Pentafluorophenyl-Bpin, 2,3,5,6-tetrafluorophenyl-Bpin, 2,3,4,6-tetrafluorophenyl-Bpin and 2,4,6-trifluorophenyl-Bpin used were prepared according to the literature procedures.<sup>[1]</sup> In an argon filled glovebox, a solution of  $[(\text{COD})\text{Ir}(\text{OMe})]_2$  (0.5 mol%), 4,4'-di-tert-butyl-2,2'-bipyridine (2 mol%), bispinacolatodiboron ( $\text{B}_2\text{pin}_2$ ) (0.5 equiv.) and pentafluoroarene (1 equiv.) in hexane (dry and degassed) was stirred at room temperature in a sealed reaction vessel for 48h. The volatile materials were removed *in vacuo* to give the crude product, together with unreacted starting arene. The residue was then purified by flash chromatography on silica gel to provide the corresponding product (~90 %).

### III. General Procedures

In an argon filled glovebox, a sealable reaction tube with a cap equipped with a magnetic stir bar was charged with polyfluorophenyl boronate esters **1** (0.45 mmol), aldehydes **2** (0.4 mmol) and  $K_2CO_3$  (62.1 mg, 0.36 mmol) in toluene (3.0 mL, SPS and degassed) at room temperature. The sealed reaction vessel was placed in an oil bath at 60 °C for 36 h. After the reaction was completed, it was cooled to room temperature. The solvent was removed *in vacuo*. The residue was purified by flash chromatography on silica gel (eluant: *n*-pentane and EtOAc) to give the desired product.

### IV. Characterization

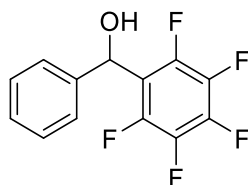

**(3a)**:<sup>[2]</sup> 101 mg, 92% yield, white solid.  $^1H$  NMR (500 MHz,  $CDCl_3$ ):  $\delta$  (ppm) = 7.40-7.36 (m, 4H), 7.34-7.31 (m, 1H), 6.23 (s, 1H), 2.92 (s, 1H).  $^{13}C\{^1H\}$  NMR (125 MHz,  $CDCl_3$ ):  $\delta$  (ppm) = 144.6 (dm,  $^1J_{F-C} = 250$  Hz), 140.8 (dm,  $^1J_{F-C} = 250$  Hz), 140.6, 137.6 (dm,  $^1J_{F-C} = 250$  Hz), 128.7, 128.3, 125.4 (t,  $J_{F-C} = 1$  Hz), 117.0 (tm,  $J_{F-C} = 17$  Hz), 67.6.  $^{19}F$  NMR (470 MHz,  $CDCl_3$ ):  $\delta$  (ppm) = -143 – -143.1 (m, 2F), -154.6 – -154.7 (m, 1F), -161.4 – -161.6 (m, 2F). HRMS (ASAP): Calcd. for  $C_{13}H_7F_5O$  274.0417, Found: 274.0403.

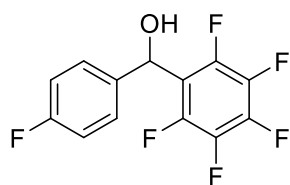

**(3b)**:<sup>[2]</sup> 109 mg, 93% yield, colorless oil.  $^1H$  NMR (500 MHz,  $CDCl_3$ ):  $\delta$  (ppm) = 7.38-7.34 (m, 2H), 7.07-7.02 (m, 2H), 6.21 (s, 1H), 2.73 (s, 1H).  $^{13}C\{^1H\}$  NMR (125 MHz,  $CDCl_3$ ):  $\delta$  (ppm) = 162.5 (d,  $^1J_{F-C} = 250$  Hz), 144.6 (dm,  $^1J_{F-C} = 250$  Hz), 140.9 (dm,  $^1J_{F-C} = 250$  Hz), 137.7 (dm,  $^1J_{F-C} = 250$  Hz), 136.3 (d,  $J_{F-C} = 3$  Hz), 127.2 (m), 116.7 (tm,  $J_{F-C} = 18$  Hz), 115.6 (d,  $J_{F-C} = 22$  Hz), 66.7.  $^{19}F$  NMR (470 MHz,  $CDCl_3$ ):  $\delta$  (ppm) = -113.7 – -113.8 (m, 1F),



-143.1 – -143.2 (m, 2F), -154.2 – -154.3 (m, 1F), -161.2 – -161.3 (m, 2F). HRMS (ASAP):  
Calcd. for C<sub>13</sub>H<sub>6</sub>F<sub>6</sub>O 292.0323, Found: 292.0312.

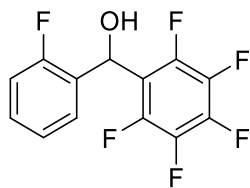

**(3c)**: 105 mg, 90% yield, colorless oil. <sup>1</sup>H NMR (500 MHz, CDCl<sub>3</sub>): δ (ppm) = 7.69-7.65 (m, 1H), 7.33-7.29 (m, 1H), 7.22-7.19 (m, 1H), 7.02-6.98 (m, 1H), 6.42 (s, 1H), 3.04 (s, 1H). <sup>13</sup>C{<sup>1</sup>H} NMR (125 MHz, CDCl<sub>3</sub>): δ (ppm) = 159.4 (d, <sup>1</sup>J<sub>F-C</sub> = 250 Hz), 144.8 (dm, <sup>1</sup>J<sub>F-C</sub> = 250 Hz), 141.0 (dm, <sup>1</sup>J<sub>F-C</sub> = 250 Hz), 137.6 (dm, <sup>1</sup>J<sub>F-C</sub> = 250 Hz), 129.9 (d, J<sub>F-C</sub> = 8 Hz), 127.4 (d, J<sub>F-C</sub> = 13 Hz), 126.9 (m), 124.2 (d, J<sub>F-C</sub> = 4 Hz), 115.7 (tm, J<sub>F-C</sub> = 15 Hz), 115.3 (d, J<sub>F-C</sub> = 21 Hz), 62.0. <sup>19</sup>F NMR (470 MHz, CDCl<sub>3</sub>): δ (ppm) = -117.8 – -117.9 (m, 1F), -142.8 – -142.9 (m, 2F), -154.4 – -154.5 (m, 1F), -161.7 – -161.9 (m, 2F). HRMS (ASAP): Calcd. for C<sub>13</sub>H<sub>6</sub>F<sub>6</sub>O 292.0323, Found: 292.0311.

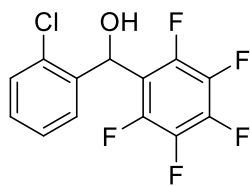

**(3d)**:<sup>[2]</sup> 108 mg, 88% yield, white solid. <sup>1</sup>H NMR (500 MHz, CDCl<sub>3</sub>): δ (ppm) = 7.81-7.79 (m, 1H), 7.36-7.27 (m, 3H), 6.36 (s, 1H), 3.32 (s, 1H). <sup>13</sup>C{<sup>1</sup>H} NMR (125 MHz, CDCl<sub>3</sub>): δ (ppm) = 145.1 (dm, <sup>1</sup>J<sub>F-C</sub> = 250 Hz), 141.1 (dm, <sup>1</sup>J<sub>F-C</sub> = 250 Hz), 137.6 (dm, <sup>1</sup>J<sub>F-C</sub> = 250 Hz), 137.4, 131.7, 129.5, 129.4, 127.5 (t, J<sub>F-C</sub> = 3 Hz), 126.8, 115.0 (tm, J<sub>F-C</sub> = 17 Hz), 64.4. <sup>19</sup>F NMR (470 MHz, CDCl<sub>3</sub>): δ (ppm) = -141.6 – -141.7 (m, 2F), -153.9 (t, J<sub>F</sub> = 21 Hz, 1F), -161.7 – -161.9 (m, 2F). HRMS (ASAP): Calcd. for C<sub>13</sub>H<sub>6</sub>F<sub>5</sub>ClO 308.0027, Found: 308.0014.

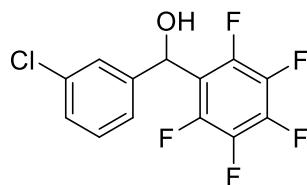

**(3e)**: 108 mg, 87% yield, colorless oil. <sup>1</sup>H NMR (500 MHz, CDCl<sub>3</sub>): δ (ppm) = 7.39 (s, 1H), 7.32-7.27 (m, 2H), 7.25-7.23 (m, 1H), 6.19 (s, 1H), 2.92 (s, 1H). <sup>13</sup>C{<sup>1</sup>H} NMR (125 MHz, CDCl<sub>3</sub>): δ (ppm) = 144.7 (dm, <sup>1</sup>J<sub>F-C</sub> = 250 Hz), 142.5, 141.1 (dm, <sup>1</sup>J<sub>F-C</sub> = 250 Hz), 137.7 (dm,

$^1J_{F-C} = 250$  Hz), 134.7, 130.0, 128.4, 125.6, 123.5, 116.3 (tm,  $J_{F-C} = 15$  Hz), 66.7.  $^{19}F$  NMR (470 MHz,  $CDCl_3$ ):  $\delta$  (ppm) = -142.8 – -142.9 (m, 2F), -153.7 – -153.8 (m, 1F), -160.9 – -161.1 (m, 2F). HRMS (ASAP): Calcd. for  $C_{13}H_6F_5ClO$  308.0027, Found: 308.0017.

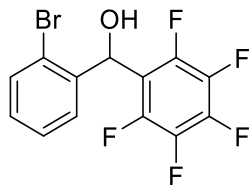

**(3f)**: 125 mg, 89% yield, white solid.  $^1H$  NMR (500 MHz,  $CDCl_3$ ):  $\delta$  (ppm) = 7.80-7.78 (m, 1H), 7.51 (dd,  $J = 8$  Hz, 1 Hz, 1H), 7.39 (tm,  $J = 8$  Hz, 1H), 7.20 (tm,  $J = 8$  Hz, 1H), 6.29 (s, 1H), 3.24 (s, 1H).  $^{13}C\{^1H\}$  NMR (125 MHz,  $CDCl_3$ ):  $\delta$  (ppm) = 145.1 (dm,  $^1J_{F-C} = 250$  Hz), 143.2 (dm,  $^1J_{F-C} = 250$  Hz), 138.9, 137.6 (dm,  $^1J_{F-C} = 250$  Hz), 132.8, 129.8, 128.1 (t,  $J_{F-C} = 3$  Hz), 127.4, 121.5, 114.9 (tm,  $J_{F-C} = 15$  Hz), 66.5.  $^{19}F$  NMR (470 MHz,  $CDCl_3$ ):  $\delta$  (ppm) = -141.0 (m, 2F), -153.7 (t,  $J_F = 20$  Hz, 1F), -161.6 – -161.8 (m, 2F). HRMS (ASAP): Calcd. for  $C_{13}H_6F_5BrO$  351.9522, Found: 351.9511.

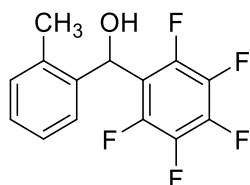

**(3g)**:<sup>[2]</sup> 91 mg, 79% yield, white solid.  $^1H$  NMR (500 MHz,  $CDCl_3$ ):  $\delta$  (ppm) = 7.54-7.52 (m, 1H), 7.27-7.24 (m, 2H), 7.19-7.17 (m, 1H), 6.30 (s, 1H), 2.63 (s, 1H), 2.31 (s, 3H).  $^{13}C\{^1H\}$  NMR (125 MHz,  $CDCl_3$ ):  $\delta$  (ppm) = 144.8 (dm,  $^1J_{F-C} = 250$  Hz), 140.8 (dm,  $^1J_{F-C} = 250$  Hz), 137.9, 137.6 (dm,  $^1J_{F-C} = 250$  Hz), 135.4, 130.8, 128.4, 126.2, 125.7 (t,  $J_{F-C} = 3$  Hz), 115.8 (tm,  $J_{F-C} = 15$  Hz), 65.3, 18.9.  $^{19}F$  NMR (470 MHz,  $CDCl_3$ ):  $\delta$  (ppm) = -142.0 – -142.1 (m), -154.4 – -154.5 (m), -161.5 – -161.7 (m, 2F). HRMS (ASAP): Calcd. for  $C_{14}H_9F_5O$  288.0574, Found: 288.0563.

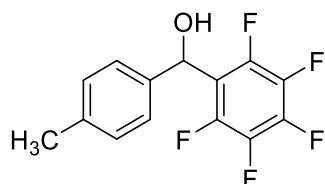

**(3h)**:<sup>[2]</sup> 93 mg, 81% yield, white solid.  $^1H$  NMR (500 MHz,  $CDCl_3$ ):  $\delta$  (ppm) = 7.28-7.27 (m, 2H), 7.20-7.18 (m, 2H), 6.17 (s, 1H), 3.20 (s, 1H), 2.37 (s, 3H).  $^{13}C\{^1H\}$  NMR (125 MHz,

CDCl<sub>3</sub>):  $\delta$  (ppm) = 144.6 (dm,  $^1J_{F-C}$  = 250 Hz), 140.7 (dm,  $^1J_{F-C}$  = 250 Hz), 138.2, 137.7 (dm,  $^1J_{F-C}$  = 251 Hz), 137.6, 129.4, 125.3, 117.1 (tm,  $J_{F-C}$  = 15 Hz), 67.5, 21.0.  $^{19}\text{F}$  NMR (470 MHz, CDCl<sub>3</sub>):  $\delta$  (ppm) = -143.1 – -143.2 (m, 2F), -155.1 (t,  $J_F$  = 21 Hz, 1F), -161.7 – -161.8 (m, 2F). HRMS (ASAP): Calcd. for C<sub>14</sub>H<sub>9</sub>F<sub>5</sub>O 288.0574, Found: 288.0563.

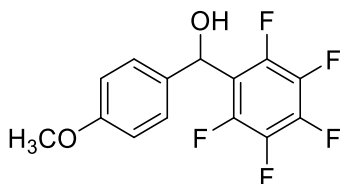

**(3i)**:<sup>[2]</sup> 86 mg, 71% yield, colorless oil.  $^1\text{H}$  NMR (500 MHz, CDCl<sub>3</sub>):  $\delta$  (ppm) = 7.30-7.28 (m, 2H), 6.88-6.85 (m, 2H), 6.14 (s, 1H), 3.79 (s, 3H), 3.24 (s, 1H).  $^{13}\text{C}\{^1\text{H}\}$  NMR (125 MHz, CDCl<sub>3</sub>):  $\delta$  (ppm) = 159.5, 144.6 (dm,  $^1J_{F-C}$  = 250 Hz), 140.7 (dm,  $^1J_{F-C}$  = 250 Hz), 137.6 (dm,  $^1J_{F-C}$  = 250 Hz), 132.7, 126.8, 117.2 (tm,  $J_{F-C}$  = 15 Hz), 114.0, 67.3, 55.2.  $^{19}\text{F}$  NMR (470 MHz, CDCl<sub>3</sub>):  $\delta$  (ppm) = -143.2 – -143.3 (m, 2F), -155.2 (t,  $J_F$  = 21 Hz, 1F), -161.7 – -161.8 (m, 2F). HRMS (ASAP): Calcd. for C<sub>14</sub>H<sub>9</sub>F<sub>5</sub>O<sub>2</sub> 304.0523, Found: 304.0512.

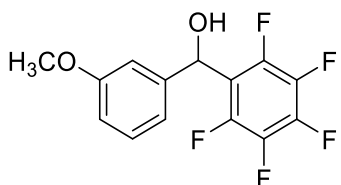

**(3j)**:<sup>[2]</sup> 86 mg, 71% yield, colorless oil.  $^1\text{H}$  NMR (500 MHz, CDCl<sub>3</sub>):  $\delta$  (ppm) = 7.28-7.25 (m, 1H), 6.97 (s, 1H), 6.92-6.91 (m, 1H), 6.85-6.83 (m, 1H), 6.17 (s, 1H), 3.80 (s, 3H), 3.01 (s, 1H).  $^{13}\text{C}\{^1\text{H}\}$  NMR (125 MHz, CDCl<sub>3</sub>):  $\delta$  (ppm) = 159.9, 144.6 (dm,  $^1J_{F-C}$  = 250 Hz), 142.3, 140.8 (dm,  $^1J_{F-C}$  = 250 Hz), 137.6 (dm,  $^1J_{F-C}$  = 250 Hz), 129.8, 117.6, 116.9 (tm,  $J_{F-C}$  = 15 Hz), 113.3, 111.3, 67.3, 55.3.  $^{19}\text{F}$  NMR (470 MHz, CDCl<sub>3</sub>):  $\delta$  (ppm) = -143.0 – -143.1 (m, 2F), -154.7 (t,  $J_F$  = 21 Hz, 1F), -161.5 – -161.6 (m, 2F). HRMS (ASAP): Calcd. for C<sub>14</sub>H<sub>9</sub>F<sub>5</sub>O<sub>2</sub> 304.0523, Found: 304.0509.

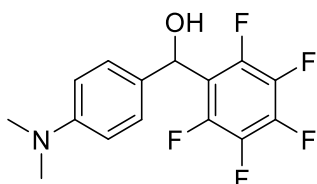

**(3k)**: 108 mg, 85% yield, white solid.  $^1\text{H}$  NMR (500 MHz, CDCl<sub>3</sub>):  $\delta$  (ppm) = 7.26-7.24 (m, 2H), 6.74-6.73 (m, 2H), 6.13 (s, 1H), 2.96 (s, 6H), 2.77 (s, 1H).  $^{13}\text{C}\{^1\text{H}\}$  NMR (125 MHz,

CDCl<sub>3</sub>):  $\delta$  (ppm) = 150.2, 144.5 (dm,  $^1J_{F-C} = 250$  Hz), 140.5 (dm,  $^1J_{F-C} = 250$  Hz), 137.6 (dm,  $^1J_{F-C} = 250$  Hz), 128.7, 126.7, 117.4 (tm,  $J_{F-C} = 15$  Hz), 112.7, 67.9, 40.7.  $^{19}\text{F}$  NMR (470 MHz, CDCl<sub>3</sub>):  $\delta$  (ppm) = -142.9 – -143.0 (m, 2F), -155.6 (s, 1F), -161.5 – -161.6 (m, 2F). HRMS (ASAP): Calcd. for C<sub>15</sub>H<sub>12</sub>F<sub>5</sub>NO [M+H]<sup>+</sup> 318.0912, Found: 318.0903.

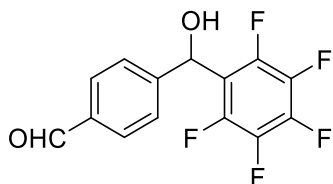

**(3l)**: 97 mg, 80% yield, white solid.  $^1\text{H}$  NMR (500 MHz, CDCl<sub>3</sub>):  $\delta$  (ppm) = 10.00 (s, 1H), 7.90-7.88 (m, 2H), 7.59-7.58 (m, 2H), 6.33 (s, 1H), 2.91 (s, 1H).  $^{13}\text{C}\{^1\text{H}\}$  NMR (125 MHz, CDCl<sub>3</sub>):  $\delta$  (ppm) = 191.9, 147.2, 144.7 (dm,  $^1J_{F-C} = 250$  Hz), 141.2 (dm,  $^1J_{F-C} = 250$  Hz), 137.7 (dm,  $^1J_{F-C} = 250$  Hz), 136.0, 130.1, 126.0, 116.4 (tm,  $J_{F-C} = 15$  Hz), 66.7.  $^{19}\text{F}$  NMR (470 MHz, CDCl<sub>3</sub>):  $\delta$  (ppm) = -142.6 – -142.7 (m, 2F), -153.3 (m, 1F), -160.7 – -160.8 (m, 2F). HRMS (ASAP): Calcd. for C<sub>14</sub>H<sub>7</sub>F<sub>5</sub>O<sub>2</sub> [M+H]<sup>+</sup> 303.0439, Found: 303.0430.

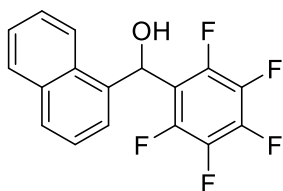

**(3m)**:<sup>[2]</sup> 91 mg, 70% yield, white solid.  $^1\text{H}$  NMR (500 MHz, CDCl<sub>3</sub>):  $\delta$  (ppm) = 8.04 (d,  $J = 9$  Hz, 1H), 7.91-7.85 (m, 1H), 7.85 (d,  $J = 10$  Hz, 1H), 7.61 (d,  $J = 8$  Hz, 1H), 7.58-7.51 (m, 2H), 7.49-7.46 (m, 1H), 6.85 (s, 1H), 2.94 (s, 1H).  $^{13}\text{C}\{^1\text{H}\}$  NMR (125 MHz, CDCl<sub>3</sub>):  $\delta$  (ppm) = 145.0 (dm,  $^1J_{F-C} = 250$  Hz), 141.9 (dm,  $^1J_{F-C} = 250$  Hz), 137.7 (dm,  $^1J_{F-C} = 250$  Hz), 134.9, 133.9, 130.3, 129.4, 129.0, 126.8, 125.9, 125.1, 123.9 (t,  $J_{F-C} = 2$  Hz), 122.7, 116.1 (tm,  $J_{F-C} = 15$  Hz), 65.2.  $^{19}\text{F}$  NMR (470 MHz, CDCl<sub>3</sub>):  $\delta$  (ppm) = -142.0 – -142.1 (m, 2F), -154.2 (t,  $J_F = 21$  Hz, 1F), -161.3 – -161.4 (m, 2F). HRMS (ASAP): Calcd. for C<sub>17</sub>H<sub>9</sub>F<sub>5</sub>O 324.0574, Found: 324.0561.

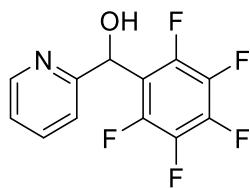

**(3n)**: 90 mg, 82% yield, white solid.  $^1\text{H}$  NMR (500 MHz,  $\text{CDCl}_3$ ):  $\delta$  (ppm) = 8.59 (d,  $J$  = 4 Hz, 1H), 7.72-7.69 (m, 1H), 7.30-7.28 (m, 1H), 7.16 (d,  $J$  = 8 Hz, 1H), 6.17 (s, 1H), 5.52 (s, 1H).  $^{13}\text{C}\{^1\text{H}\}$  NMR (125 MHz,  $\text{CDCl}_3$ ):  $\delta$  (ppm) = 157.3, 147.9, 145.3 (dm,  $^1J_{\text{F-C}} = 250$  Hz), 141.1 (dm,  $^1J_{\text{F-C}} = 250$  Hz), 137.6 (dm,  $^1J_{\text{F-C}} = 250$  Hz), 137.3, 123.2, 120.4, 116.7 (tm,  $J_{\text{F-C}} = 18$  Hz), 65.5.  $^{19}\text{F}$  NMR (470 MHz,  $\text{CDCl}_3$ ):  $\delta$  (ppm) = -143.3 – -143.4 (m, 2F), -154.3 – -154.4 (m, 1F), -161.7 – -161.9 (m, 2F). HRMS (ASAP): Calcd. For  $\text{C}_{12}\text{H}_6\text{F}_5\text{NO}$   $[\text{M}+\text{H}]^+$  276.0442, Found: 276.0435.

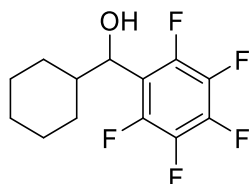

**(3o)**: 90 mg, 80% yield, white solid.  $^1\text{H}$  NMR (500 MHz,  $\text{CDCl}_3$ ):  $\delta$  (ppm) = 4.66 (d,  $J$  = 9 Hz, 1H), 2.45 (s, 1H), 2.16-2.13 (m, 1H), 1.83-1.78 (m, 2H), 1.68-1.66 (m, 2H), 1.29-1.13 (m, 4H), 1.05-1.03 (m, 1H), 0.96-0.88 (m, 1H).  $^{13}\text{C}\{^1\text{H}\}$  NMR (125 MHz,  $\text{CDCl}_3$ ):  $\delta$  (ppm) = 144.7 (dm,  $^1J_{\text{F-C}} = 250$  Hz), 140.3 (dm,  $^1J_{\text{F-C}} = 250$  Hz), 137.4 (dm,  $^1J_{\text{F-C}} = 250$  Hz), 116.5 (tm,  $J_{\text{F-C}} = 16$  Hz), 71.4, 43.3, 29.7, 28.9, 26.1, 25.6, 25.5.  $^{19}\text{F}$  NMR (470 MHz,  $\text{CDCl}_3$ ):  $\delta$  (ppm) = -142.9 – -143.0 (m, 2F), -155.7 (t,  $J_{\text{F}} = 19$  Hz, 1F), -162.2 – -162.3 (m, 2F). HRMS (ASAP): Calcd. for  $\text{C}_{13}\text{H}_{13}\text{F}_5\text{O}$   $[\text{M}-\text{H}]^+$  279.0803, Found: 279.0800.

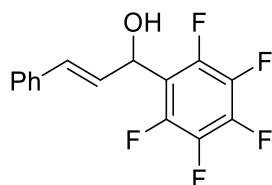

**(3p)**:<sup>[2]</sup> 101 mg, 84% yield, white solid.  $^1\text{H}$  NMR (500 MHz,  $\text{CDCl}_3$ ):  $\delta$  (ppm) = 7.40-7.38 (m, 2H), 7.36-7.33 (m, 2H), 7.30-7.27 (m, 1H), 6.71-6.68 (m, 1H), 6.55-6.50 (m, 1H), 5.75 (d,  $J$  = 6 Hz, 1H), 2.57 (s, 1H).  $^{13}\text{C}\{^1\text{H}\}$  NMR (125 MHz,  $\text{CDCl}_3$ ):  $\delta$  (ppm) = 144.8 (dm,  $^1J_{\text{F-C}} = 250$  Hz), 140.8 (dm,  $^1J_{\text{F-C}} = 250$  Hz), 137.7 (dm,  $^1J_{\text{F-C}} = 250$  Hz), 135.7, 132.8, 128.6, 128.4, 127.5, 126.7, 116.1 (tm,  $J_{\text{F-C}} = 15$  Hz), 66.9.  $^{19}\text{F}$  NMR (470 MHz,  $\text{CDCl}_3$ ):  $\delta$  (ppm) = -143.4

- -143.5 (m, 2F), -154.9 (t,  $J_F = 20$  Hz, 1F), -161.7 – -161.8 (m, 2F). HRMS (ASAP): Calcd. for  $C_{15}H_9F_5O$  300.0574, Found: 300.0564.

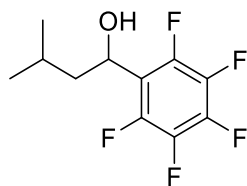

**(3q)**: 77 mg, 76% yield, white solid.  $^1H$  NMR (500 MHz,  $CDCl_3$ ):  $\delta$  (ppm) = 5.13-5.10 (m, 1H), 2.34 (s, 1H), 1.94-1.88 (m, 1H), 1.68-1.59 (m, 2H), 0.96-0.93 (m, 6H).  $^{13}C\{^1H\}$  NMR (125 MHz,  $CDCl_3$ ):  $\delta$  (ppm) = 144.7 (dm,  $^1J_{F-C} = 250$  Hz), 140.4 (dm,  $^1J_{F-C} = 250$  Hz), 137.5 (dm,  $^1J_{F-C} = 250$  Hz), 117.4 (tm,  $J_{F-C} = 15$  Hz), 64.7 (m), 45.8, 25.1, 22.5, 22.1.  $^{19}F$  NMR (470 MHz,  $CDCl_3$ ):  $\delta$  (ppm) = -144.2 – -144.3 (m, 2F), -155.6 – -155.7 (m, 1F), -161.9 – -162.1 (m, 2F). HRMS (ASAP): Calcd. for  $C_{11}H_{11}F_5O$   $[M-H]^+$  253.0646, Found: 253.0643.

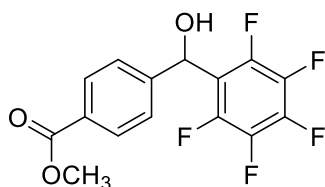

**(3r)**: 114 mg, 86% yield, colorless oil.  $^1H$  NMR (500 MHz,  $CDCl_3$ ):  $\delta$  (ppm) = 7.95-7.93 (m, 2H), 7.45-7.43 (m, 2H), 6.26 (s, 1H), 3.87 (s, 3H), 3.80 (s, 1H).  $^{13}C\{^1H\}$  NMR (125 MHz,  $CDCl_3$ ):  $\delta$  (ppm) = 167.1, 145.9, 144.7 (dm,  $^1J_{F-C} = 250$  Hz), 141.0 (dm,  $^1J_{F-C} = 250$  Hz), 137.6 (dm,  $^1J_{F-C} = 250$  Hz), 129.8, 129.4, 125.4, 116.7 (tm,  $J_{F-C} = 17$  Hz), 66.5, 52.3.  $^{19}F$  NMR (470 MHz,  $CDCl_3$ ):  $\delta$  (ppm) = -142.7 – -142.8 (m, 2F), -154.3 (t,  $J_F = 21$  Hz, 1F), -161.4 – -161.5 (m, 2F). HRMS (ASAP): Calcd. for  $C_{15}H_9F_5O_3$   $[M+H]^+$  333.0545, Found: 333.0535.

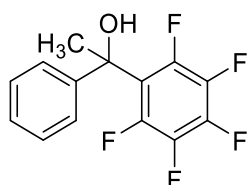

**(3s)**: 81 mg, 70% yield, colorless oil.  $^1H$  NMR (500 MHz,  $CDCl_3$ ):  $\delta$  (ppm) = 7.36-7.27 (m, 5H), 2.82 (s, 1H), 2.01 (t,  $J = 4$  Hz, 3H).  $^{13}C\{^1H\}$  NMR (125 MHz,  $CDCl_3$ ):  $\delta$  (ppm) = 146.8, 145.2 (dm,  $^1J_{F-C} = 250$  Hz), 140.5 (dm,  $^1J_{F-C} = 250$  Hz), 137.9 (dm,  $^1J_{F-C} = 250$  Hz), 128.6, 127.7, 124.1, 120.7 (tm,  $J_{F-C} = 14$  Hz), 76.9, 31.7 (t,  $J_{F-C} = 6$  Hz).  $^{19}F$  NMR (470 MHz,

CDCl<sub>3</sub>):  $\delta$  (ppm) = -139.0 – -139.1 (m, 2F), -155.0 – -155.1 (m, 1F), -161.6 – -161.8 (m, 2F).

HRMS (ASAP): Calcd. for C<sub>14</sub>H<sub>9</sub>F<sub>5</sub>O [M-OH]<sup>+</sup> 271.0541, Found: 271.0534.

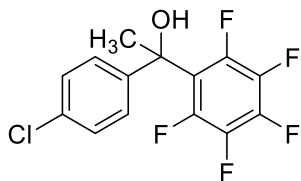

(**3t**): 92 mg, 71% yield, colorless oil. <sup>1</sup>H NMR (500 MHz, CDCl<sub>3</sub>):  $\delta$  (ppm) = 7.32-7.26 (m, 4H), 3.02 (s, 1H), 1.99 (t, *J* = 4 Hz, 3H). <sup>13</sup>C{<sup>1</sup>H} NMR (125 MHz, CDCl<sub>3</sub>):  $\delta$  (ppm) = 145.4, 145.2 (dm, <sup>1</sup>*J*<sub>F-C</sub> = 250 Hz), 140.6 (dm, <sup>1</sup>*J*<sub>F-C</sub> = 250 Hz), 138.9 (dm, <sup>1</sup>*J*<sub>F-C</sub> = 250 Hz), 133.6, 128.7, 125.7, 120.1 (tm, *J*<sub>F-C</sub> = 15 Hz), 76.5, 31.7 (t, *J*<sub>F-C</sub> = 6 Hz). <sup>19</sup>F NMR (470 MHz, CDCl<sub>3</sub>):  $\delta$  (ppm) = -138.9 – -139.1 (m, 2F), -154.4 – -154.5 (m, 1F), -161.2 – -161.4 (m, 2F).

HRMS (ASAP): Calcd. for C<sub>14</sub>H<sub>8</sub>F<sub>5</sub>ClO 322.0184, Found: 322.0172.

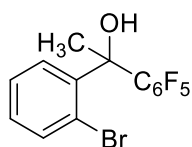

(**3u**): 89 mg, 61% yield, colorless oil. <sup>1</sup>H NMR (500 MHz, CDCl<sub>3</sub>):  $\delta$  (ppm) = 7.88-7.86 (m, 1H), 7.53-7.51 (m, 1H), 7.42-7.39 (m, 1H), 7.19-7.16 (m, 1H), 3.27 (s, 1H), 2.11 (t, *J* = 3 Hz, 3H). <sup>13</sup>C{<sup>1</sup>H} NMR (125 MHz, CDCl<sub>3</sub>):  $\delta$  (ppm) = 145.2 (dm, <sup>1</sup>*J*<sub>F-C</sub> = 250 Hz), 144.4, 140.6 (dm, <sup>1</sup>*J*<sub>F-C</sub> = 250 Hz), 137.7 (dm, <sup>1</sup>*J*<sub>F-C</sub> = 250 Hz), 134.6, 129.5, 127.7, 126.7 (t, *J*<sub>F-C</sub> = 2 Hz), 120.1, 119.7 (tm, *J*<sub>F-C</sub> = 15 Hz), 76.2, 28.9 (t, *J*<sub>F-C</sub> = 4 Hz). <sup>19</sup>F NMR (470 MHz, CDCl<sub>3</sub>):  $\delta$  (ppm) = -139.1 – -139.2 (m, 2F), -155.4 – -155.5 (m, 1F), -162.3 – -162.5 (m, 2F). HRMS (ASAP): Calcd. for C<sub>14</sub>H<sub>8</sub>F<sub>5</sub>BrO 365.9679, Found: 365.9668.

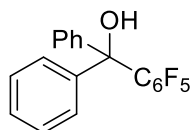

(**3v**): 84 mg, 60% yield, colorless oil. <sup>1</sup>H NMR (500 MHz, CDCl<sub>3</sub>):  $\delta$  (ppm) = 7.38-7.36 (m, 6H), 7.31-7.29 (m, 4H), 3.56 (s, 1H). <sup>13</sup>C{<sup>1</sup>H} NMR (125 MHz, CDCl<sub>3</sub>):  $\delta$  (ppm) = 145.1 (dm, <sup>1</sup>*J*<sub>F-C</sub> = 250 Hz), 144.3, 140.7 (dm, <sup>1</sup>*J*<sub>F-C</sub> = 250 Hz), 138.1 (dm, <sup>1</sup>*J*<sub>F-C</sub> = 250 Hz), 128.4, 128.3, 126.9, 121.1 (tm, *J*<sub>F-C</sub> = 12 Hz), 80.9. <sup>19</sup>F NMR (470 MHz, CDCl<sub>3</sub>):  $\delta$  (ppm) = -136.4

- -136.5 (m, 2F), -154.5 – -154.6 (m, 1F), -161.5 – -161.7 (m, 2F). HRMS (ASAP): Calcd. for C<sub>19</sub>H<sub>11</sub>F<sub>5</sub>O 350.0730, Found: 350.0719.

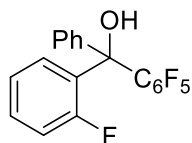

(**3w**): 93 mg, 63% yield, colorless oil. <sup>1</sup>H NMR (500 MHz, CDCl<sub>3</sub>): δ (ppm) = 7.41-7.33 (m, 6H), 7.11-7.05 (m, 2H), 6.94-6.90 (m, 1H), 3.69 (s, 1H). <sup>13</sup>C{<sup>1</sup>H} NMR (125 MHz, CDCl<sub>3</sub>): δ (ppm) = 160.9 (d, <sup>1</sup>J<sub>F-C</sub> = 250 Hz), 145.1 (dm, <sup>1</sup>J<sub>F-C</sub> = 250 Hz), 142.5, 140.5 (dm, <sup>1</sup>J<sub>F-C</sub> = 250 Hz), 137.7 (dm, <sup>1</sup>J<sub>F-C</sub> = 250 Hz), 131.9 (d, J<sub>F-C</sub> = 11 Hz), 130.4 (d, J<sub>F-C</sub> = 9 Hz), 128.6, 128.5, 126.7, 124.0 (d, J<sub>F-C</sub> = 3 Hz), 119.9 (tm, J<sub>F-C</sub> = 15 Hz), 116.0 (d, J<sub>F-C</sub> = 22 Hz), 78.5. <sup>19</sup>F NMR (470 MHz, CDCl<sub>3</sub>): δ (ppm) = -111.5 – -111.6 (m, 1F), -137.5 – -137.6 (m, 2F), -154.6 – -154.7 (m, 1F), -161.8 – -161.9 (m, 2F). HRMS (ASAP): Calcd. for C<sub>19</sub>H<sub>10</sub>F<sub>6</sub>O 368.0636, Found: 368.0625.

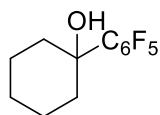

(**3x**): 76 mg, 71% yield, white solid. <sup>1</sup>H NMR (500 MHz, CDCl<sub>3</sub>): δ (ppm) = 2.38 (s, 1H), 2.08-2.00 (m, 4H), 1.86-1.69 (m, 3H), 1.63-1.59 (m, 2H), 1.35-1.27 (m, 1H). <sup>13</sup>C{<sup>1</sup>H} NMR (125 MHz, CDCl<sub>3</sub>): δ (ppm) = 145.2 (dm, <sup>1</sup>J<sub>F-C</sub> = 250 Hz), 139.7 (dm, <sup>1</sup>J<sub>F-C</sub> = 250 Hz), 137.8 (dm, <sup>1</sup>J<sub>F-C</sub> = 250 Hz), 121.6 (tm, J<sub>F-C</sub> = 12 Hz), 75.4, 37.3 (t, J<sub>F-C</sub> = 4 Hz), 25.1, 21.4. <sup>19</sup>F NMR (470 MHz, CDCl<sub>3</sub>): δ (ppm) = -140.1 – -140.2 (m, 2F), -156.5 – -156.6 (m, 1F), -162.1 – -162.2 (m, 2F). HRMS (ASAP): Calcd. for C<sub>12</sub>H<sub>11</sub>F<sub>5</sub>O 266.0730, Found: 266.0721.

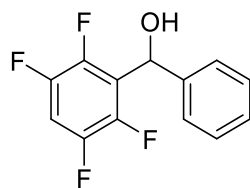

(**4a**): 84 mg, 82% yield, colorless oil. <sup>1</sup>H NMR (500 MHz, CDCl<sub>3</sub>): δ (ppm) = 7.42-7.36 (m, 4H), 7.34-7.30 (m, 1H), 7.05-6.98 (m, 1H), 6.26 (s, 1H), 2.97 (s, 1H). <sup>13</sup>C{<sup>1</sup>H} NMR (125 MHz, CDCl<sub>3</sub>): δ (ppm) = 146.1 (dm, <sup>1</sup>J<sub>F-C</sub> = 250 Hz), 144.1 (dm, <sup>1</sup>J<sub>F-C</sub> = 250 Hz), 140.7, 128.7, 128.2, 125.5, 122.7 (t, J<sub>F-C</sub> = 15 Hz), 105.5 (t, J<sub>F-C</sub> = 23 Hz), 67.9 (m). <sup>19</sup>F NMR (470



MHz, CDCl<sub>3</sub>):  $\delta$  (ppm) = -138.5 – -138.6 (m, 2F), -143.6 – -143.7 (m, 2F). HRMS (ASAP): calcd. for C<sub>13</sub>H<sub>8</sub>F<sub>4</sub>O 256.0511, Found: 256.0500.

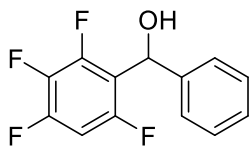

**(4b)**: 86 mg, 84% yield, colorless oil. <sup>1</sup>H NMR (500 MHz, CDCl<sub>3</sub>):  $\delta$  (ppm) = 7.40-7.35 (m, 4H), 7.32-7.29 (m, 1H), 6.81-6.76 (m, 1H), 6.19 (s, 1H), 2.77 (s, 1H). <sup>13</sup>C{<sup>1</sup>H} NMR (125 MHz, CDCl<sub>3</sub>):  $\delta$  (ppm) = 154.8 (dm, <sup>1</sup>J<sub>F-C</sub> = 250 Hz), 150.2 (dm, <sup>1</sup>J<sub>F-C</sub> = 250 Hz), 149.6 (dm, <sup>1</sup>J<sub>F-C</sub> = 250 Hz), 141.1 (m), 137.3 (dm, <sup>1</sup>J<sub>F-C</sub> = 250 Hz), 128.6, 128.0, 125.4 (t, J<sub>F-C</sub> = 1 Hz), 117.0 (tm, J<sub>F-C</sub> = 19 Hz), 101.3 (m), 67.4 (m). <sup>19</sup>F NMR (470 MHz, CDCl<sub>3</sub>):  $\delta$  (ppm) = -117.8 – -117.9 (m, 1F), -132.4 – -132.5 (m, 1F), -135.2 – -135.3 (m, 1F), -164.2 – -164.4 (m, 1F). HRMS (ASAP): calcd. for C<sub>13</sub>H<sub>8</sub>F<sub>4</sub>O 256.0511, Found: 256.0499.

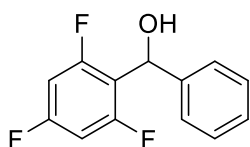

**(4c)**: 76 mg, 80% yield, colorless oil. <sup>1</sup>H NMR (500 MHz, CDCl<sub>3</sub>):  $\delta$  (ppm) = 7.40-7.34 (m, 4H), 7.31-7.27 (m, 1H), 6.71-6.65 (m, 2H), 6.19 (s, 1H), 2.77 (s, 1H). <sup>13</sup>C{<sup>1</sup>H} NMR (125 MHz, CDCl<sub>3</sub>):  $\delta$  (ppm) = 162.2 (dt, <sup>1</sup>J<sub>F-C</sub> = 250 Hz, J<sub>F-C</sub> = 16 Hz), 161.1 (ddd, <sup>1</sup>J<sub>F-C</sub> = 250 Hz, J<sub>F-C</sub> = 15 Hz, 11 Hz), 141.8, 128.5, 127.7, 125.5 (t, J<sub>F-C</sub> = 1 Hz), 115.9 (td, J<sub>F-C</sub> = 17 Hz, 5 Hz), 100.8 (dd, J<sub>F-C</sub> = 54 Hz, 2 Hz), 67.2 (t, J<sub>F-C</sub> = 3 Hz). <sup>19</sup>F NMR (470 MHz, CDCl<sub>3</sub>):  $\delta$  (ppm) = -108.1 – -108.2 (m, 1F), -111.1 – -111.2 (m, 2F). HRMS (ASAP): calcd. for C<sub>13</sub>H<sub>9</sub>F<sub>3</sub>O 238.0600, Found: 238.0595.

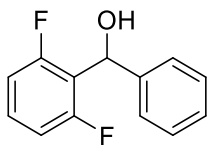

**(4d)**: 70 mg, 80% yield, white solid. <sup>1</sup>H NMR (500 MHz, CDCl<sub>3</sub>):  $\delta$  (ppm) = 7.44-7.42 (m, 2H), 7.39-7.32 (m, 2H), 7.31-7.23 (m, 2H), 6.94-6.88 (m, 2H), 6.27 (s, 1H), 2.90 (s, 1H). <sup>13</sup>C{<sup>1</sup>H} NMR (125 MHz, CDCl<sub>3</sub>):  $\delta$  (ppm) = 160.8 (dd, <sup>1</sup>J<sub>F-C</sub> = 250 Hz, J<sub>F-C</sub> = 8 Hz), 142.1, 129.6 (t, J<sub>F-C</sub> = 11 Hz), 128.4, 127.6, 125.6 (t, J<sub>F-C</sub> = 1 Hz), 119.5 (t, J<sub>F-C</sub> = 16 Hz), 112.0 (m),

67.6 (t,  $J_{F-C} = 3$  Hz).  $^{19}\text{F}$  NMR (470 MHz,  $\text{CDCl}_3$ ):  $\delta$  (ppm) = -114.4 – -114.5 (m, 2F). HRMS (ASAP): calcd. for  $\text{C}_{13}\text{H}_{10}\text{F}_2\text{O}$  220.0694, Found: 220.0691.

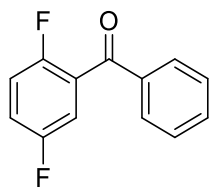

(**4e**):<sup>[3,4]</sup> 69 mg, 79% yield, colorless oil.  $^1\text{H}$  NMR (500 MHz,  $\text{CDCl}_3$ ):  $\delta$  (ppm) = 7.85-7.83 (m, 2H), 7.64-7.61 (m, 1H), 7.51-7.47 (m, 2H), 7.28-7.20 (m, 2H), 7.17-7.12 (m, 1H).  $^{13}\text{C}\{^1\text{H}\}$  NMR (125 MHz,  $\text{CDCl}_3$ ):  $\delta$  (ppm) = 191.9 (m), 158.4 (dd,  $^1J_{F-C} = 250$  Hz,  $J_{F-C} = 2$  Hz), 155.9 (dd,  $^1J_{F-C} = 250$  Hz,  $J_{F-C} = 2$  Hz), 136.7, 133.8, 129.8 (d,  $J_{F-C} = 1$  Hz), 128.6, 128.1 (dd,  $J_{F-C} = 18$  Hz, 7 Hz), 119.5 (dd,  $J_{F-C} = 24$  Hz, 9 Hz), 117.6 (dd,  $J_{F-C} = 25$  Hz, 8 Hz), 116.9 (dd,  $J_{F-C} = 25$  Hz, 4 Hz).  $^{19}\text{F}$  NMR (470 MHz,  $\text{CDCl}_3$ ):  $\delta$  (ppm) = -117.0 – -117.1 (m, 1F), -117.6 – -117.7 (m, 1F). HRMS (ASAP): calcd. for  $\text{C}_{13}\text{H}_8\text{F}_2\text{O}$   $[\text{M}+\text{H}]^+$  219.0618, Found: 219.0614.

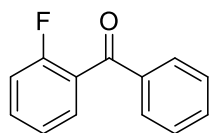

(**4f**):<sup>[5,6]</sup> 60 mg, 75% yield, colorless oil.  $^1\text{H}$  NMR (500 MHz,  $\text{CDCl}_3$ ):  $\delta$  (ppm) = 7.85-7.83 (m, 2H), 7.60-7.44 (m, 5H), 7.22-7.24 (m, 1H), 7.17-7.12 (m, 1H).  $^{13}\text{C}\{^1\text{H}\}$  NMR (125 MHz,  $\text{CDCl}_3$ ):  $\delta$  (ppm) = 193.5, 160.1 (d,  $^1J_{F-C} = 250$  Hz), 137.4 (d,  $J_{F-C} = 1$  Hz), 133.5, 133.1 (d,  $J_{F-C} = 8$  Hz), 130.7 (d,  $J_{F-C} = 3$  Hz), 129.8 (d,  $J_{F-C} = 1$  Hz), 128.5, 127.0 (d,  $J_{F-C} = 15$  Hz), 124.3 (d,  $J_{F-C} = 4$  Hz), 116.3 (d,  $J_{F-C} = 21$  Hz).  $^{19}\text{F}$  NMR (470 MHz,  $\text{CDCl}_3$ ):  $\delta$  (ppm) = -111.0 – -111.1 (m, 1F). HRMS (ASAP): calcd. for  $\text{C}_{13}\text{H}_9\text{FO}$   $[\text{M}+\text{H}]^+$  201.0710, Found: 201.0706.

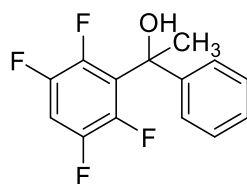

(**4g**): 73 mg, 68% yield, colorless oil.  $^1\text{H}$  NMR (500 MHz,  $\text{CDCl}_3$ ):  $\delta$  (ppm) = 7.35-7.34 (m, 4H), 7.30-7.27 (m, 1H), 7.08-7.01 (m, 1H), 3.21 (s, 1H), 2.03 (t,  $J = 4$  Hz, 3H).  $^{13}\text{C}\{^1\text{H}\}$  NMR (125 MHz,  $\text{CDCl}_3$ ):  $\delta$  (ppm) = 147.1, 146.4 (dm,  $^1J_{F-C} = 250$  Hz), 144.8 (dm,  $^1J_{F-C} = 250$  Hz), 128.5, 127.6, 126.1 (t,  $J_{F-C} = 12$  Hz), 124.2, 105.2 (t,  $J_{F-C} = 22$  Hz), 77.1, 31.5 (t,

$J_{F-C} = 7$  Hz).  $^{19}\text{F}$  NMR (470 MHz,  $\text{CDCl}_3$ ):  $\delta$  (ppm) = -138.5 – -138.6 (m, 2F), -139.6 – -139.7 (m, 2F). HRMS (ASAP): calcd. for  $\text{C}_{14}\text{H}_{10}\text{F}_4\text{O}$   $[\text{M-OH}]^+$  253.0635, Found: 253.0630.

## V. $^1\text{H}$ NMR, $^{19}\text{F}$ NMR and $^{13}\text{C}$ NMR Spectra

### Compound 3a: $^1\text{H}$ NMR spectrum (500 MHz, $\text{CDCl}_3$ ).

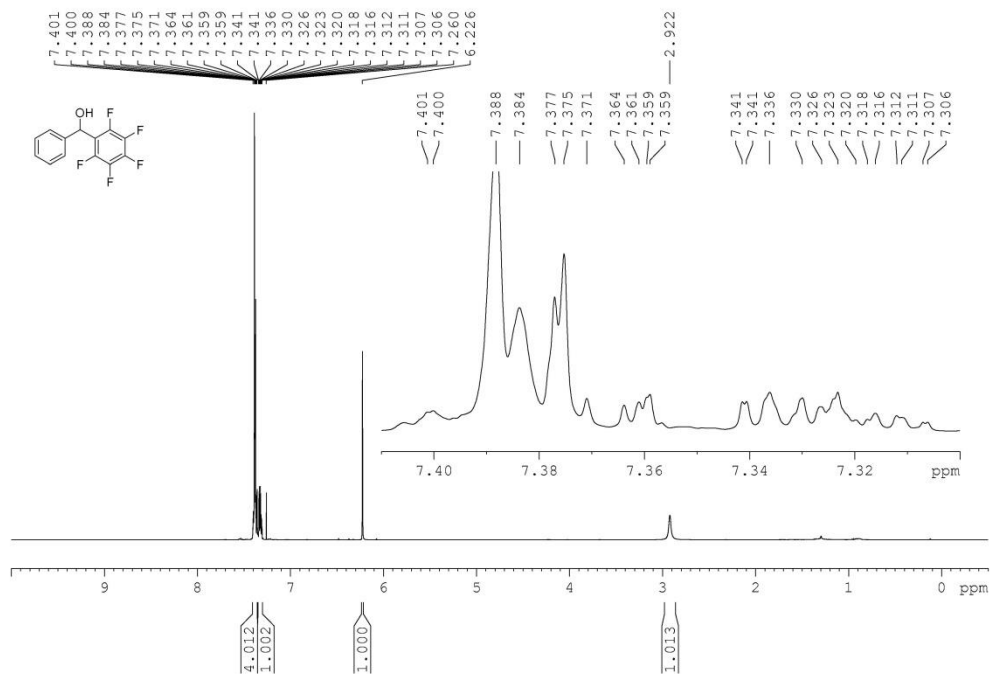

**Compound 3a:**  $^{13}\text{C}\{^1\text{H}\}$  NMR spectrum (125 MHz,  $\text{CDCl}_3$ ).

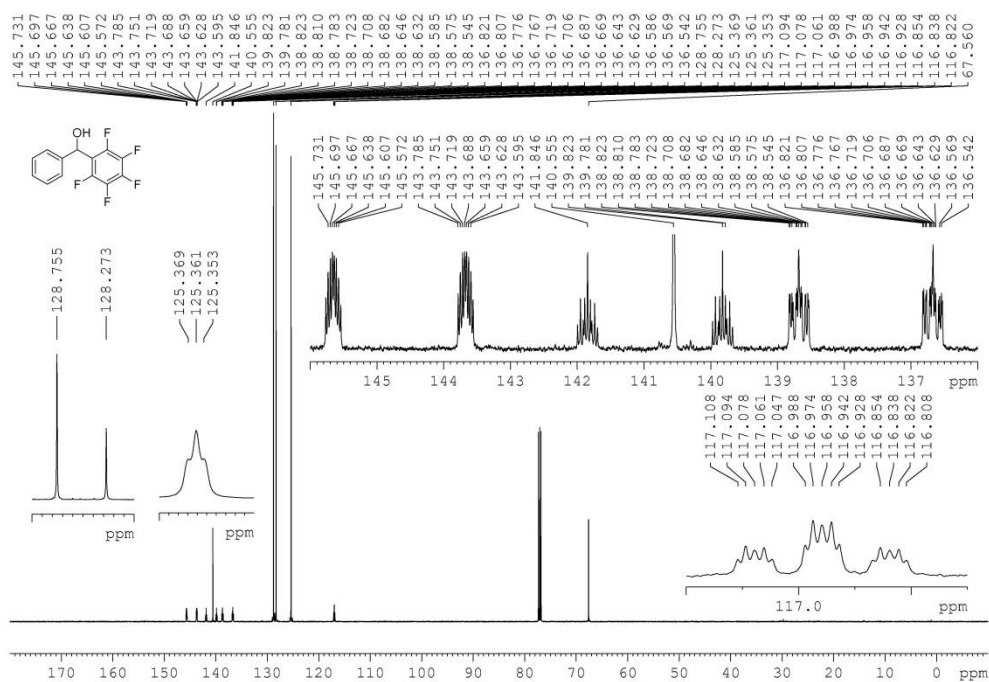

**Compound 3a:**  $^{19}\text{F}$  NMR spectrum (470 MHz,  $\text{CDCl}_3$ ).

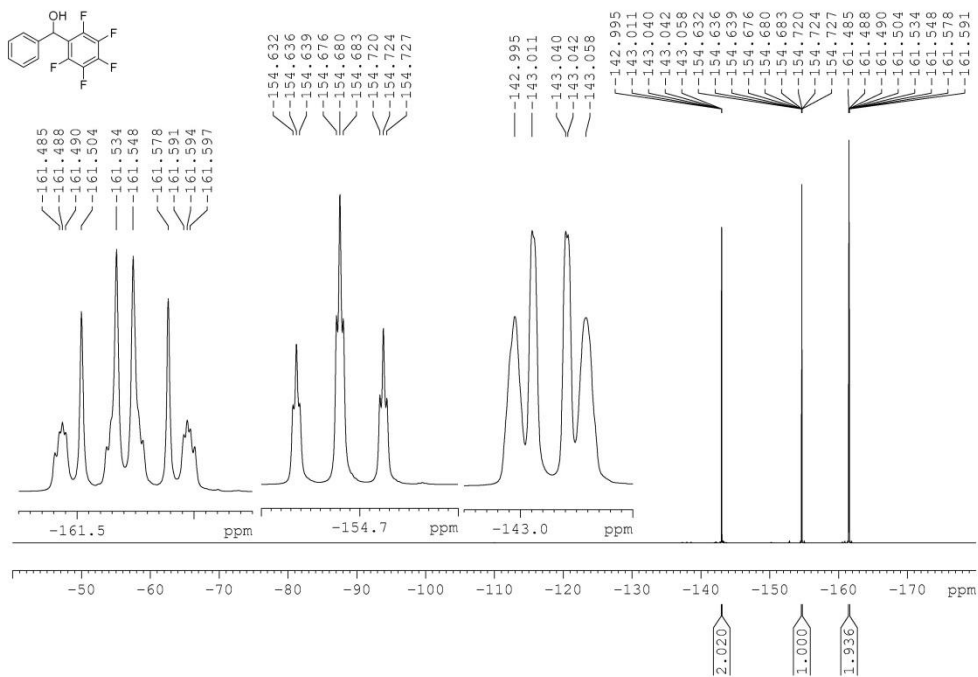

**Compound 3b:  $^1\text{H}$  NMR spectrum (500 MHz,  $\text{CDCl}_3$ ).**

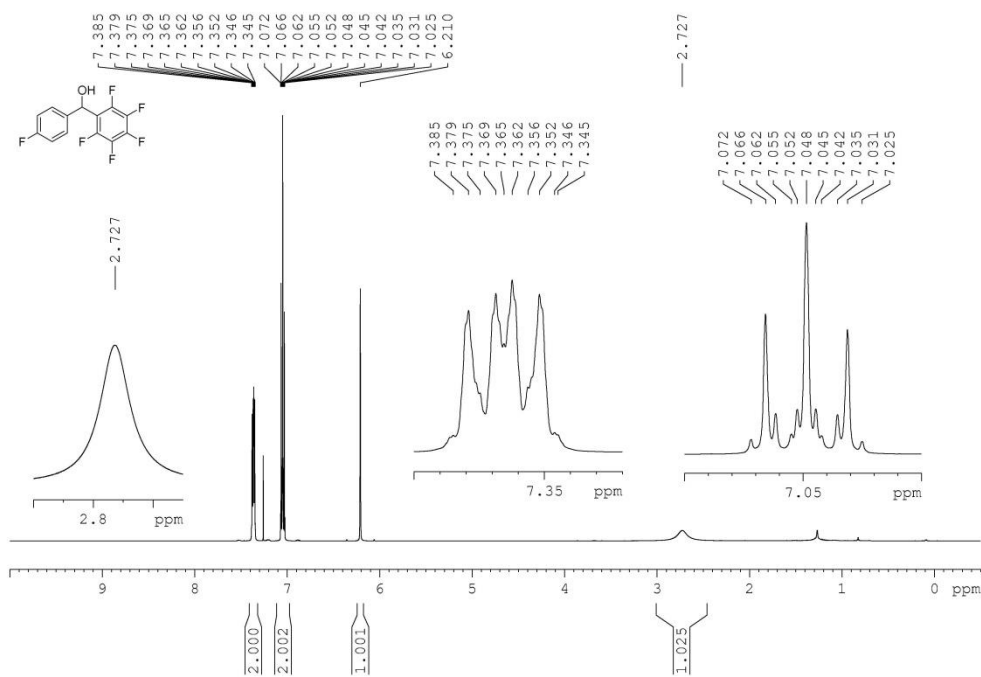

**Compound 3b:  $^{13}\text{C}\{^1\text{H}\}$  NMR spectrum (125 MHz,  $\text{CDCl}_3$ ).**

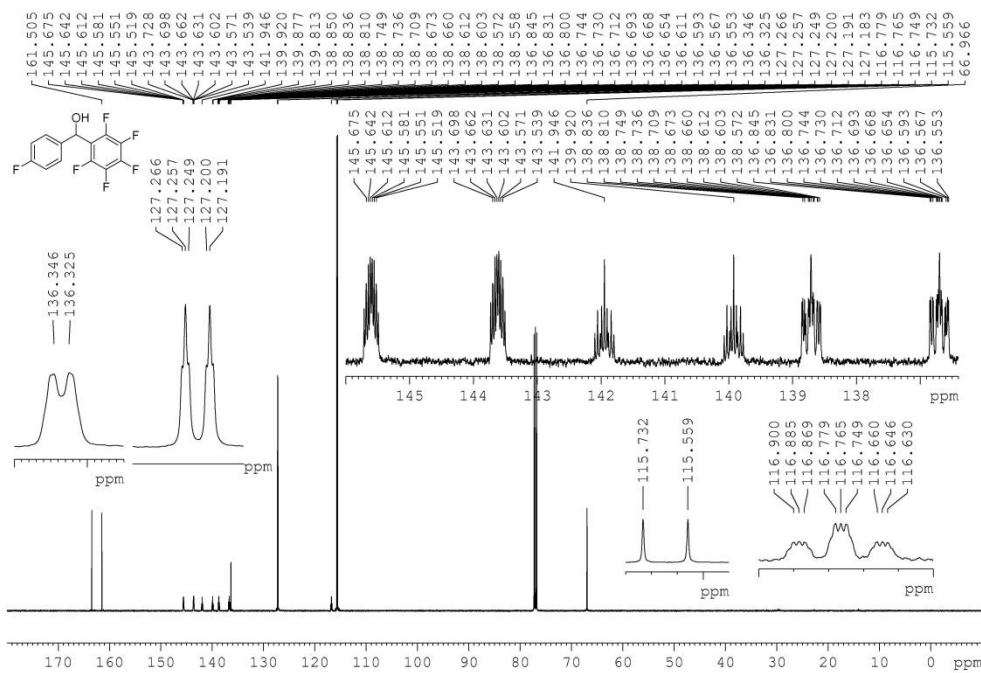













**Compound 3f:  $^1\text{H}$  NMR spectrum (500 MHz,  $\text{CDCl}_3$ ).**

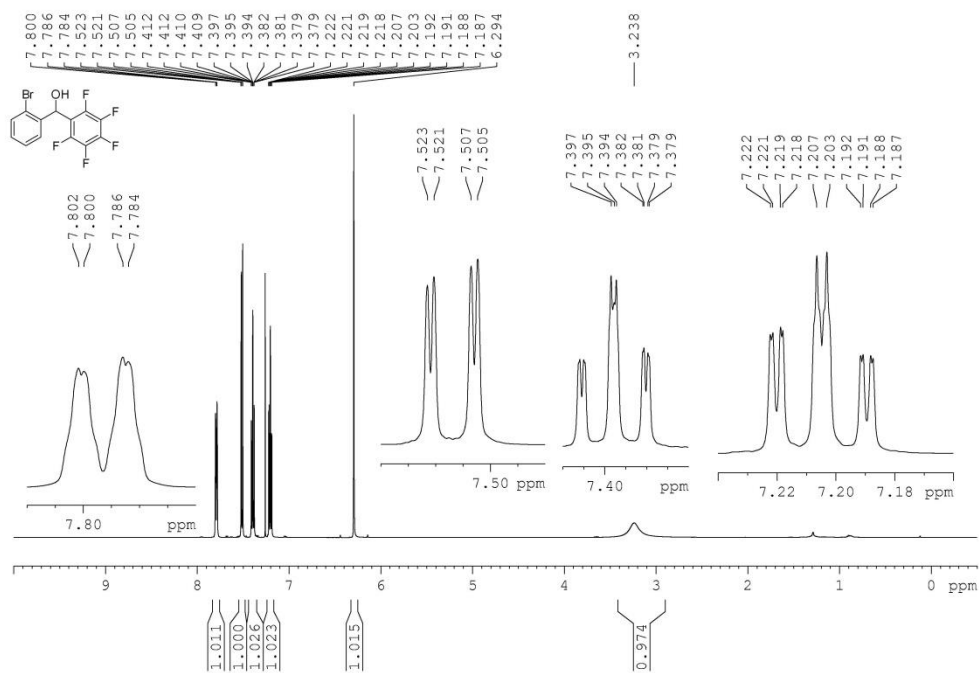

**Compound 3f:  $^{13}\text{C}\{^1\text{H}\}$  NMR spectrum (125 MHz,  $\text{CDCl}_3$ ).**

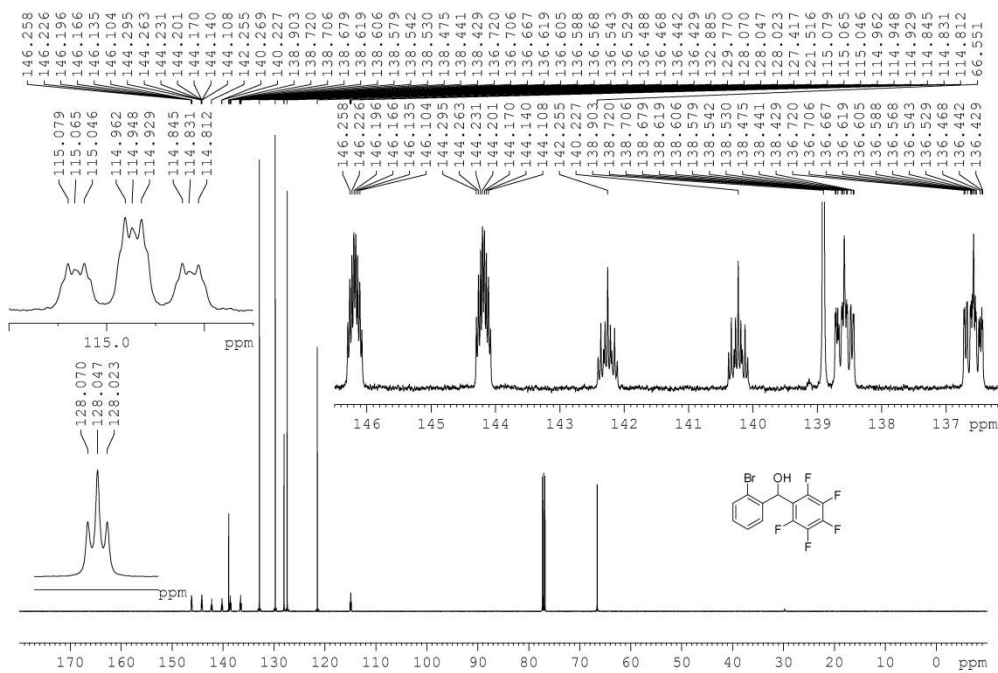

**Compound 3f:  $^{19}\text{F}$  NMR spectrum (470 MHz,  $\text{CDCl}_3$ ).**

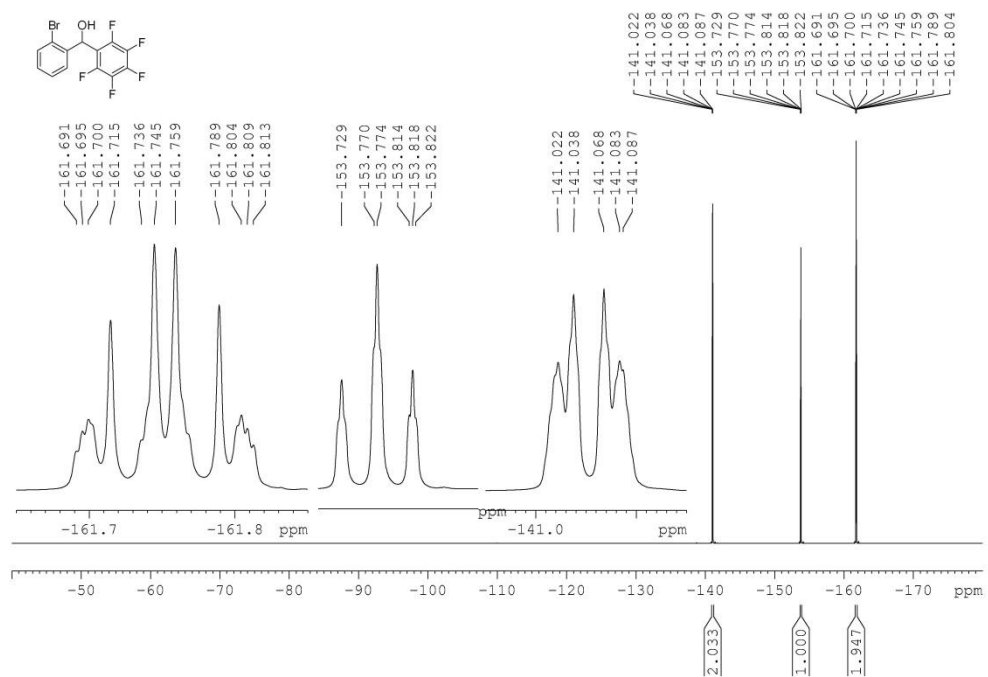

**Compound 3g:  $^1\text{H}$  NMR spectrum (500 MHz,  $\text{CDCl}_3$ ).**

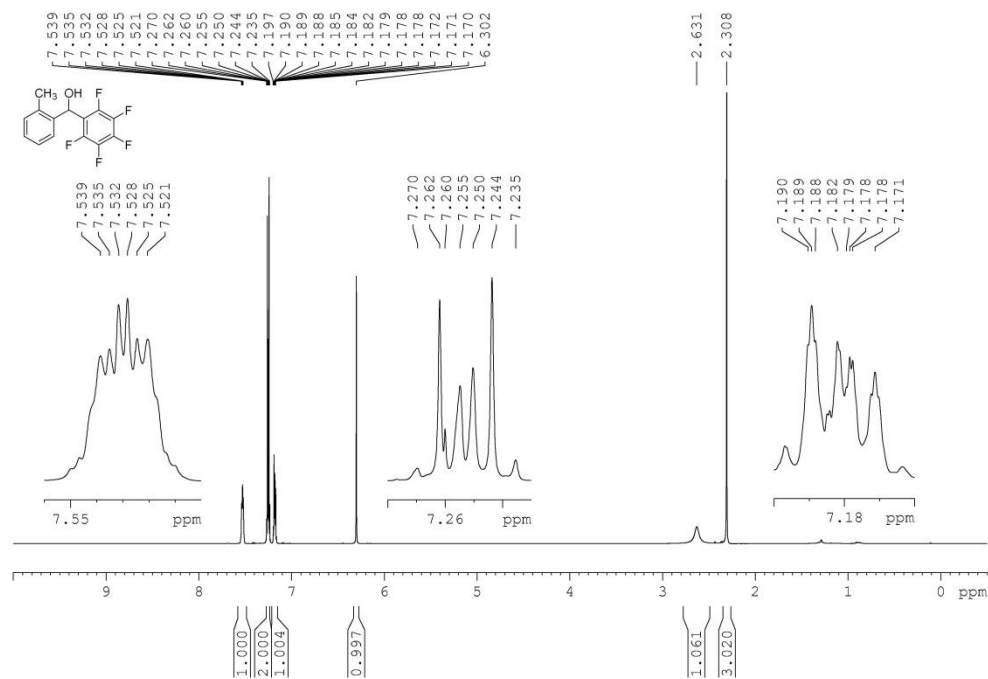

**Compound 3g:  $^{13}\text{C}\{^1\text{H}\}$  NMR spectrum (125 MHz,  $\text{CDCl}_3$ ).**

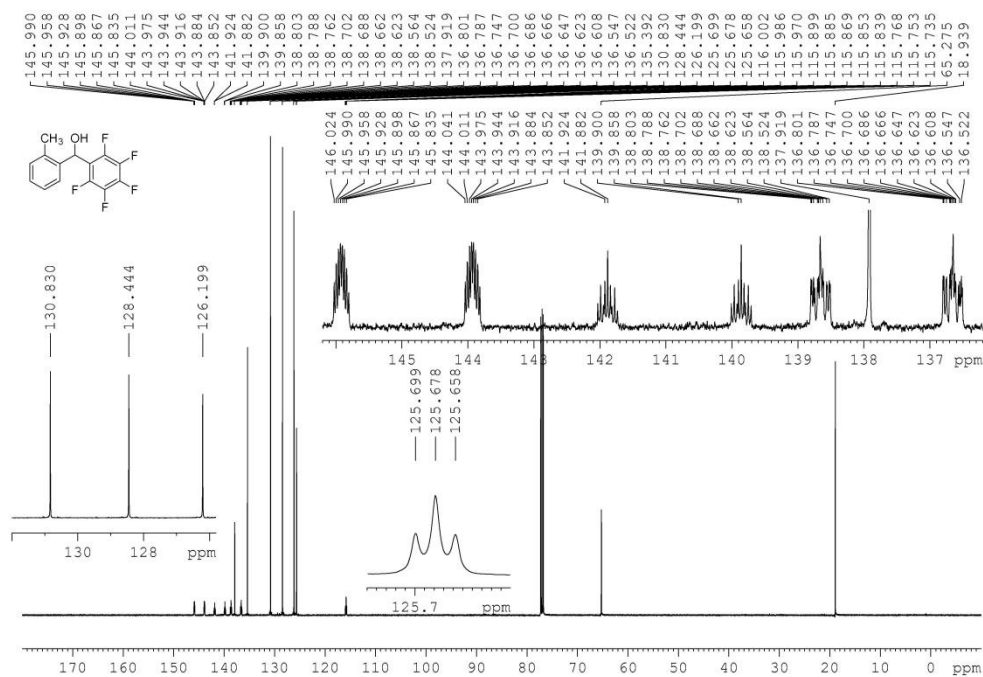

**Compound 3g:  $^{19}\text{F}$  NMR spectrum (470 MHz,  $\text{CDCl}_3$ ).**

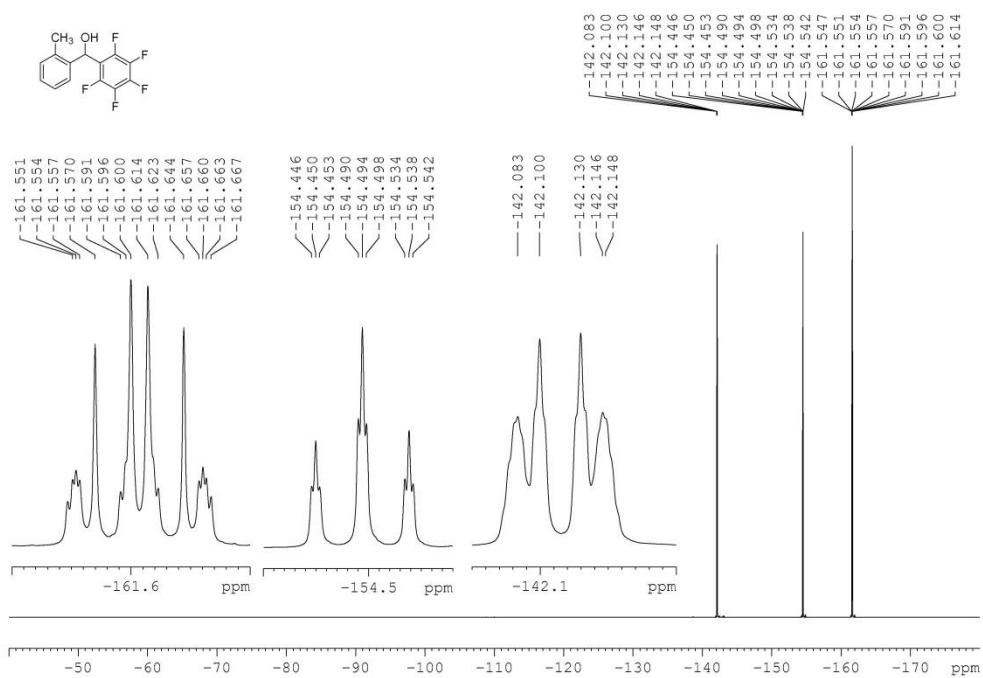



**Compound 3h:  $^{19}\text{F}$  NMR spectrum (470 MHz,  $\text{CDCl}_3$ ).**

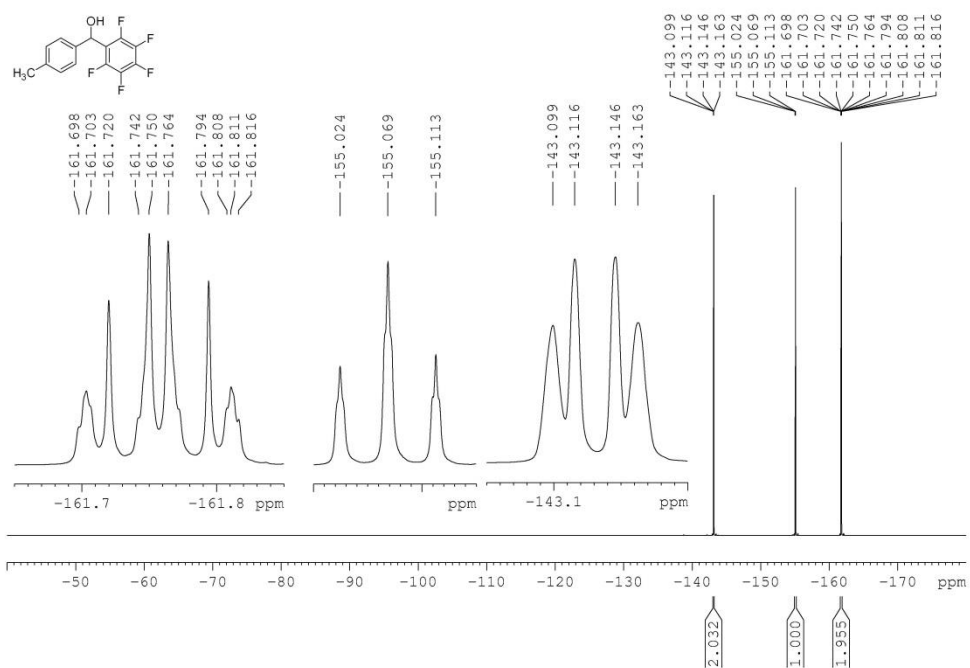

**Compound 3i:  $^1\text{H}$  NMR spectrum (500 MHz,  $\text{CDCl}_3$ ).**

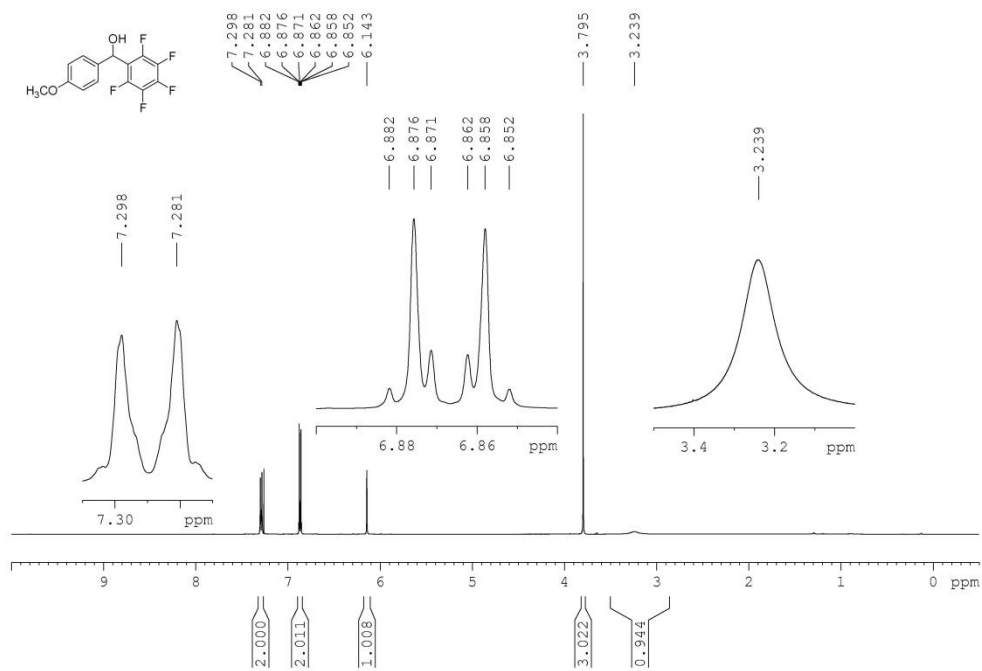



**Compound 3i:  $^{13}\text{C}\{^1\text{H}\}$  NMR spectrum (125 MHz,  $\text{CDCl}_3$ ).**

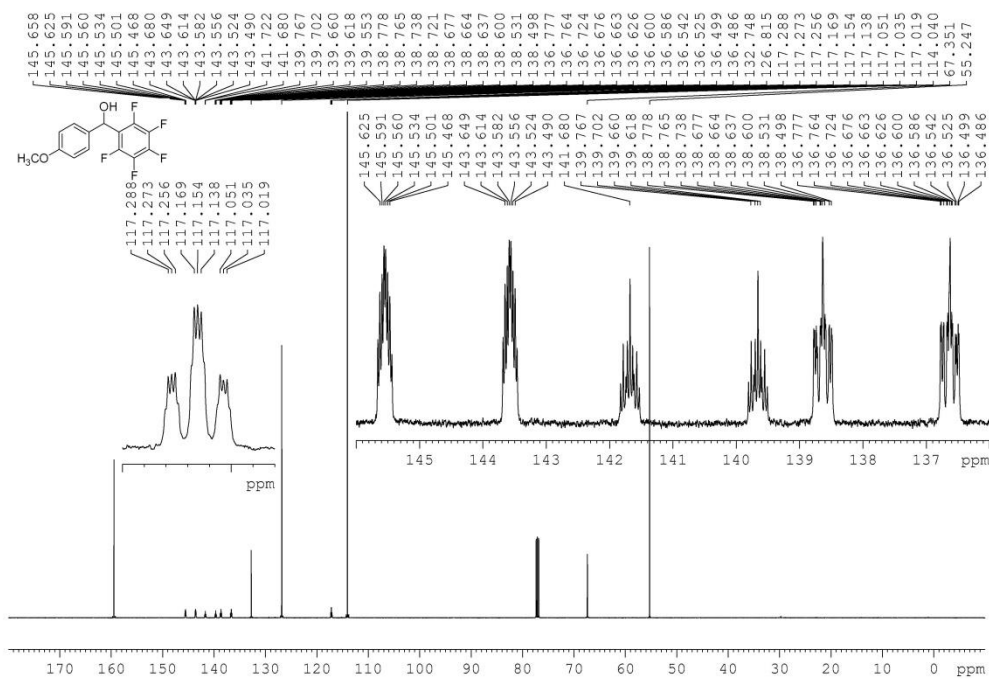

**Compound 3i:  $^{19}\text{F}$  NMR spectrum (470 MHz,  $\text{CDCl}_3$ ).**

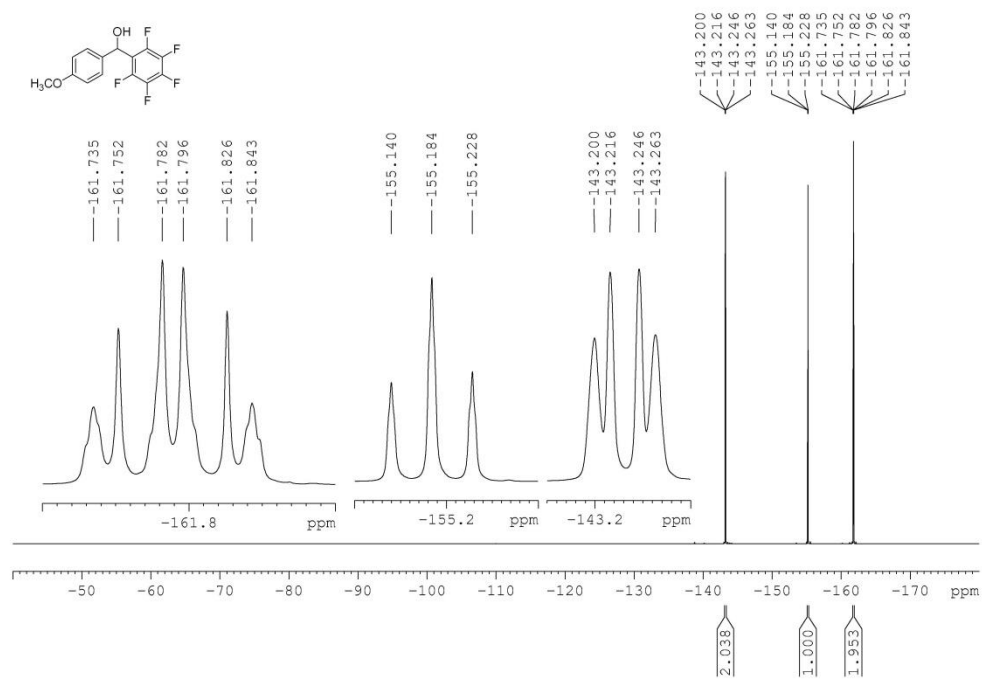

**Compound 3j:  $^1\text{H}$  NMR spectrum (500 MHz,  $\text{CDCl}_3$ ).**

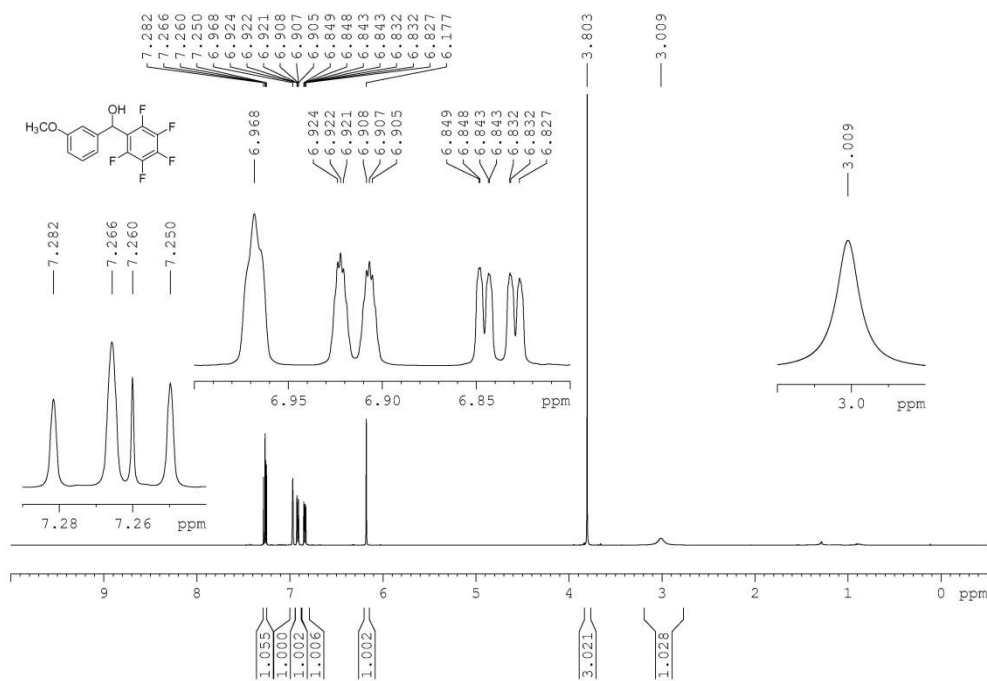

**Compound 3j:  $^{13}\text{C}\{^1\text{H}\}$  NMR spectrum (125 MHz,  $\text{CDCl}_3$ ).**

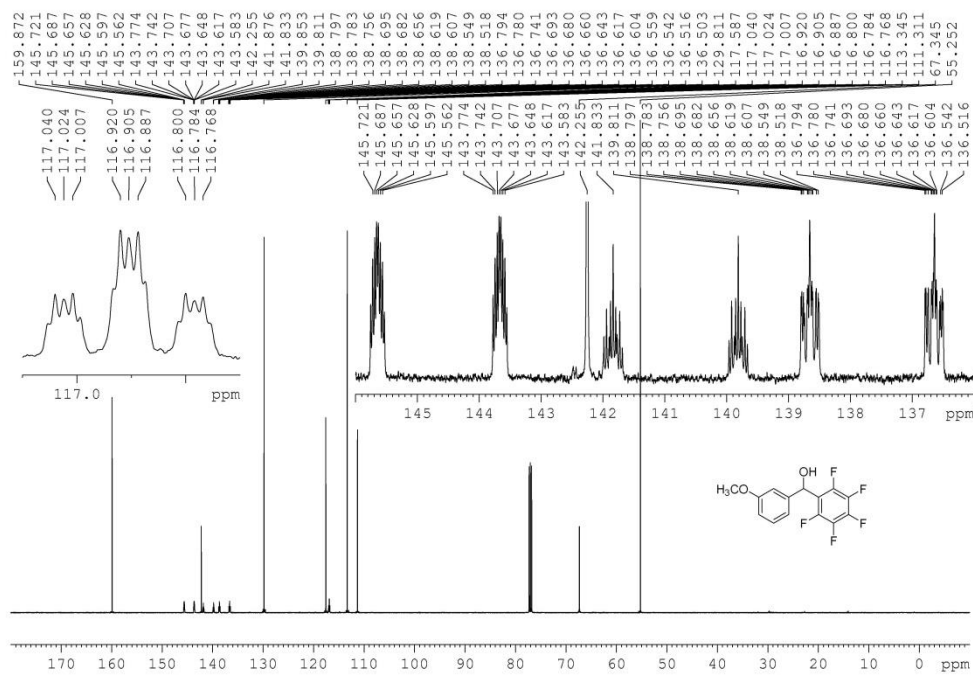

**Compound 3j:  $^{19}\text{F}$  NMR spectrum (470 MHz,  $\text{CDCl}_3$ ).**

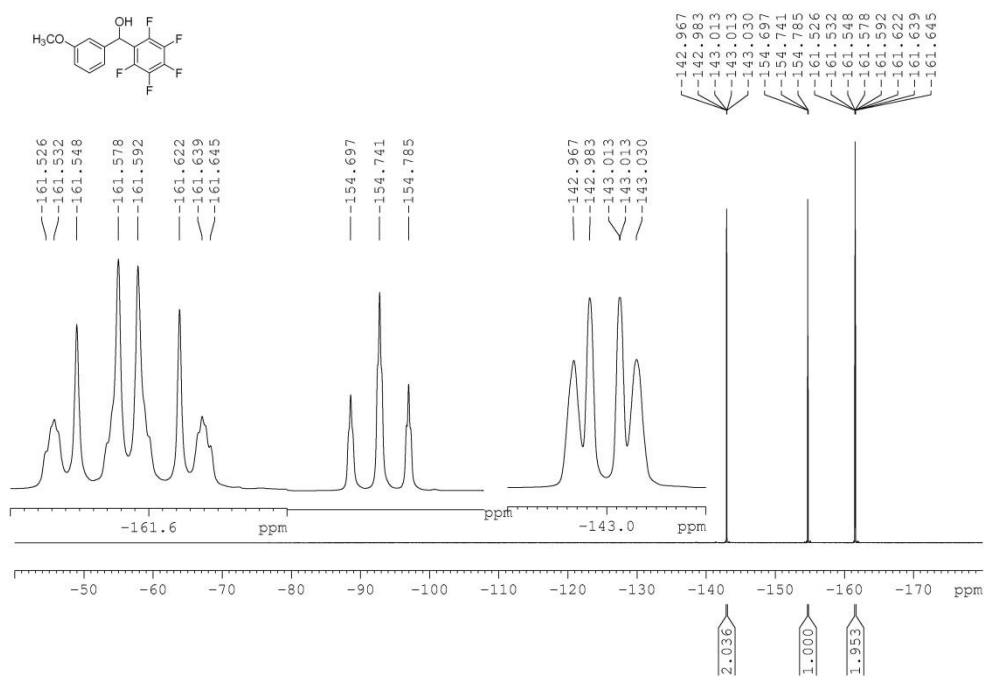

**Compound 3k:  $^1\text{H}$  NMR spectrum (500 MHz,  $\text{CDCl}_3$ ).**

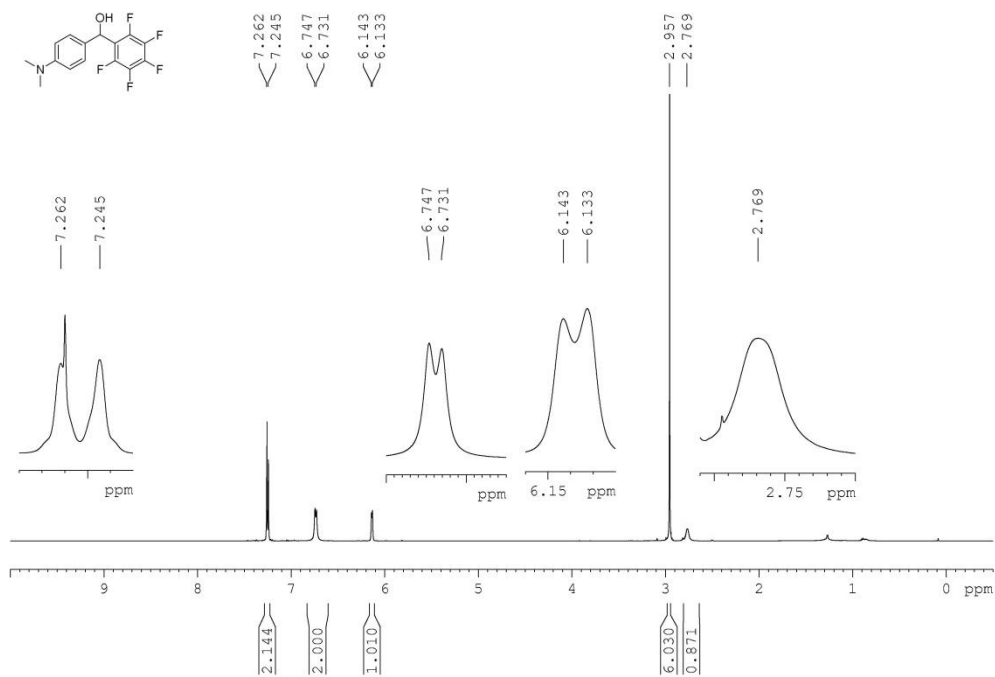

**Compound 3k:  $^{13}\text{C}\{^1\text{H}\}$  NMR spectrum (125 MHz,  $\text{CDCl}_3$ ).**

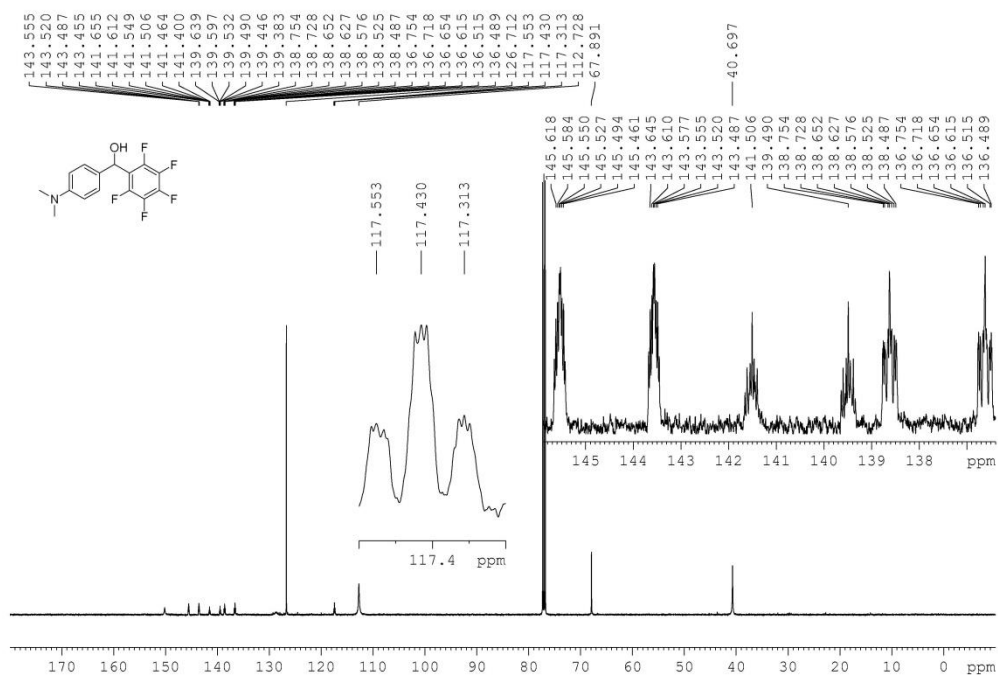

**Compound 3k:  $^{19}\text{F}$  NMR spectrum (470 MHz,  $\text{CDCl}_3$ ).**

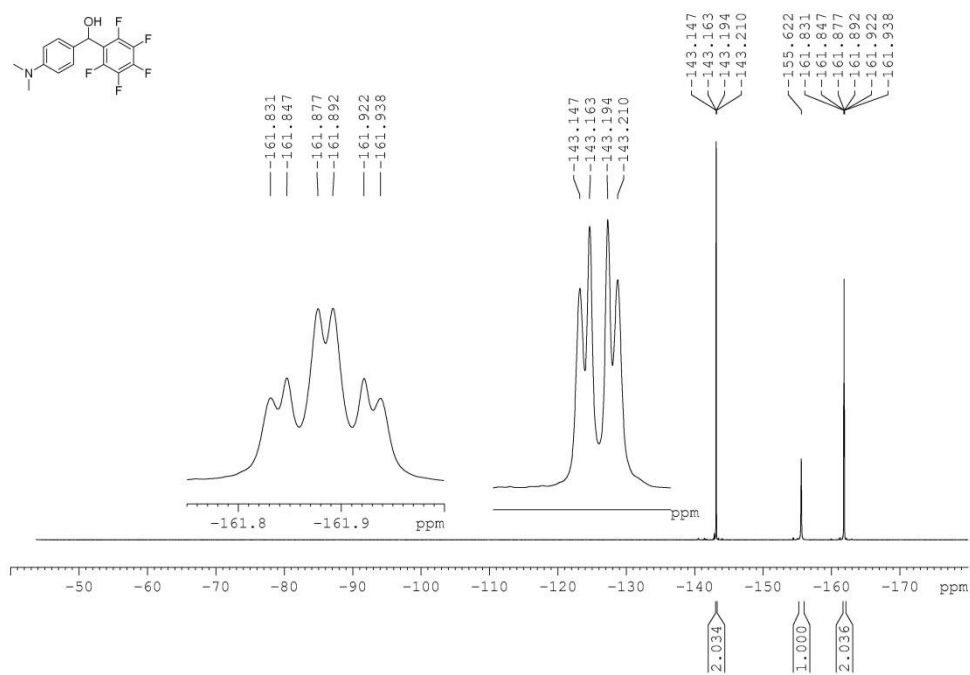

**Compound 3l:  $^1\text{H}$  NMR spectrum (500 MHz,  $\text{CDCl}_3$ ).**

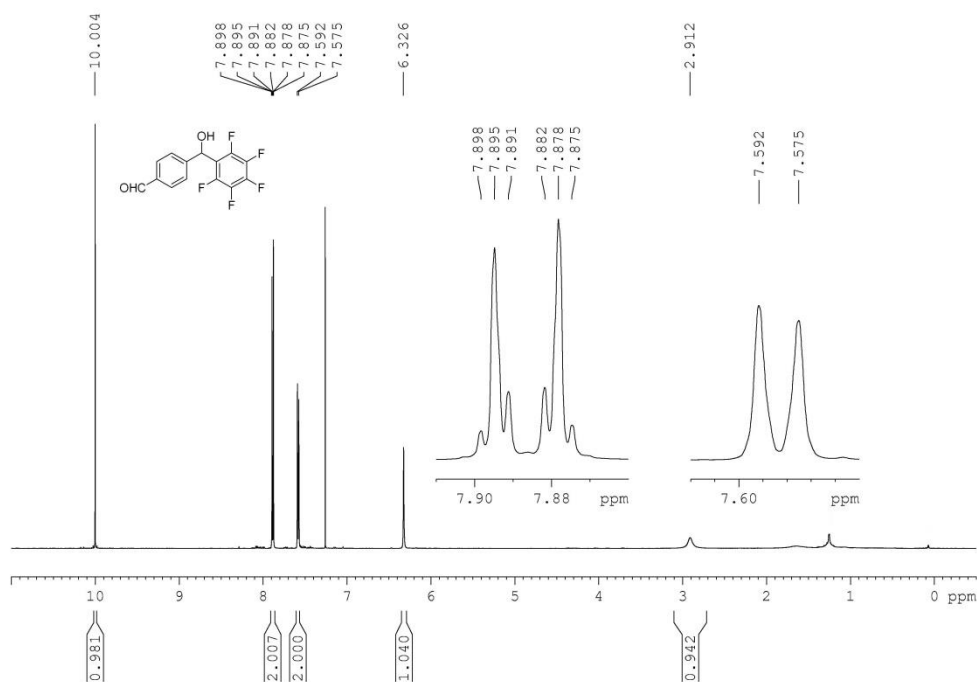

**Compound 3l:  $^{13}\text{C}\{^1\text{H}\}$  NMR spectrum (125 MHz,  $\text{CDCl}_3$ ).**

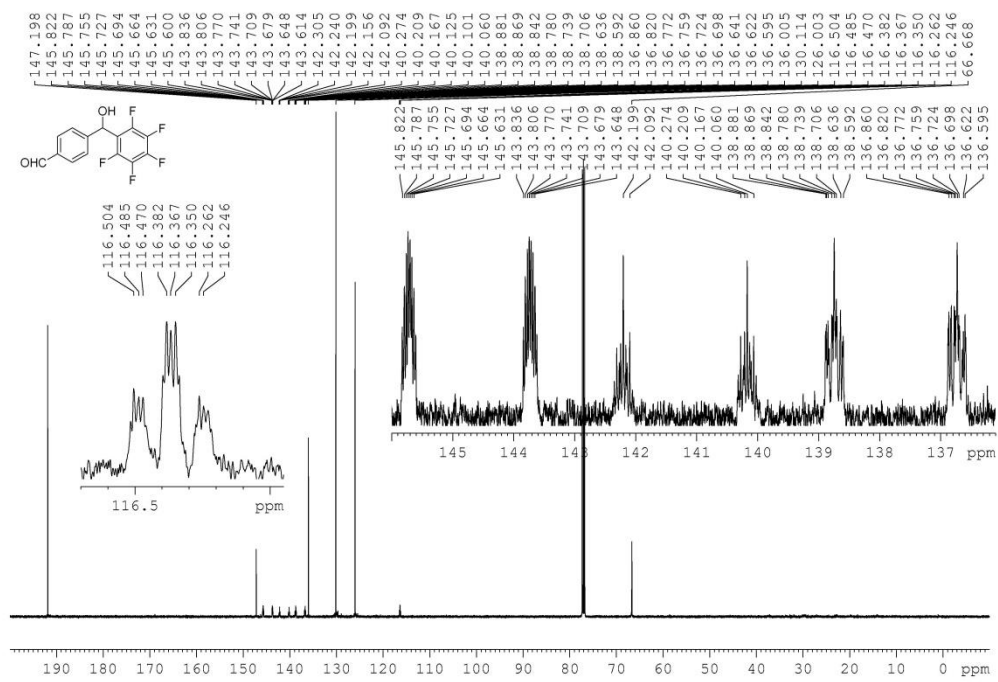

**Compound 3l:  $^{19}\text{F}$  NMR spectrum (470 MHz,  $\text{CDCl}_3$ ).**

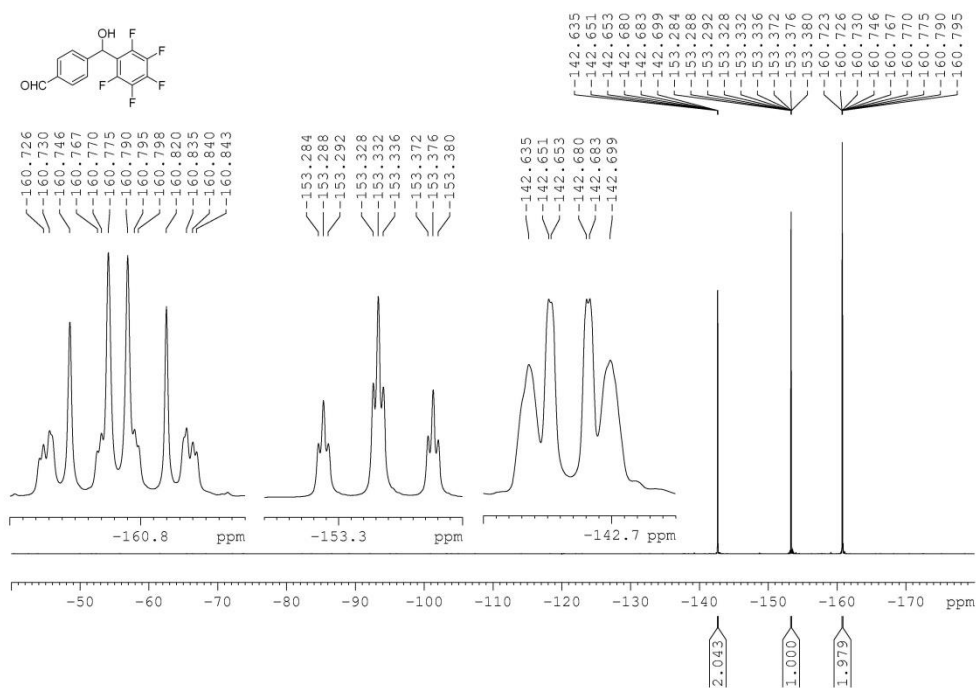

**Compound 3m:  $^1\text{H}$  NMR spectrum (500 MHz,  $\text{CDCl}_3$ ).**

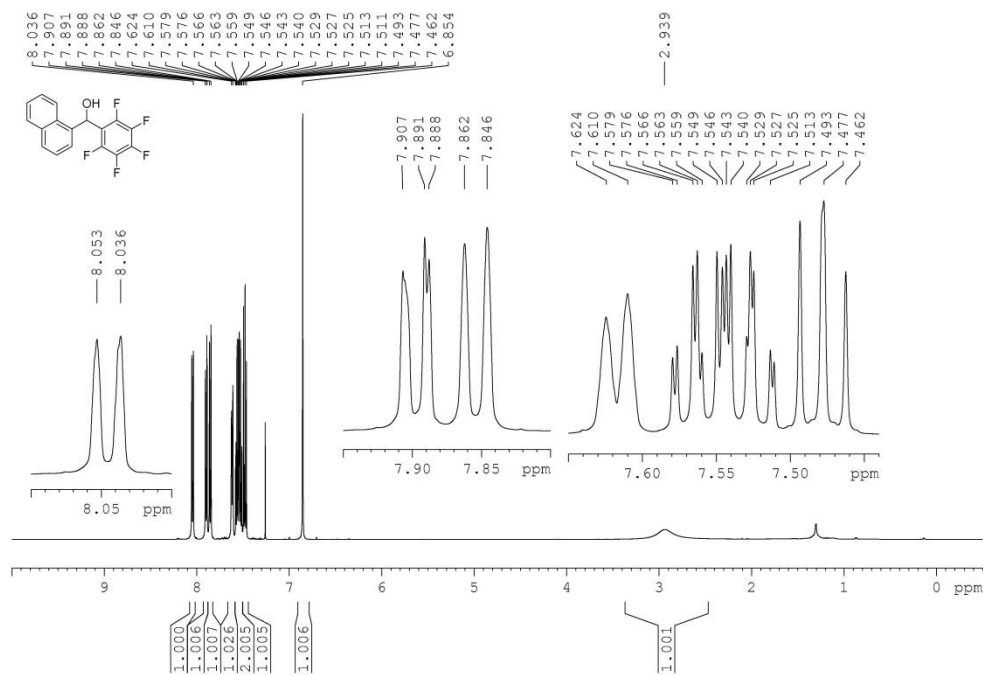

**Compound 3m:**  $^{13}\text{C}\{^1\text{H}\}$  NMR spectrum (125 MHz,  $\text{CDCl}_3$ ).

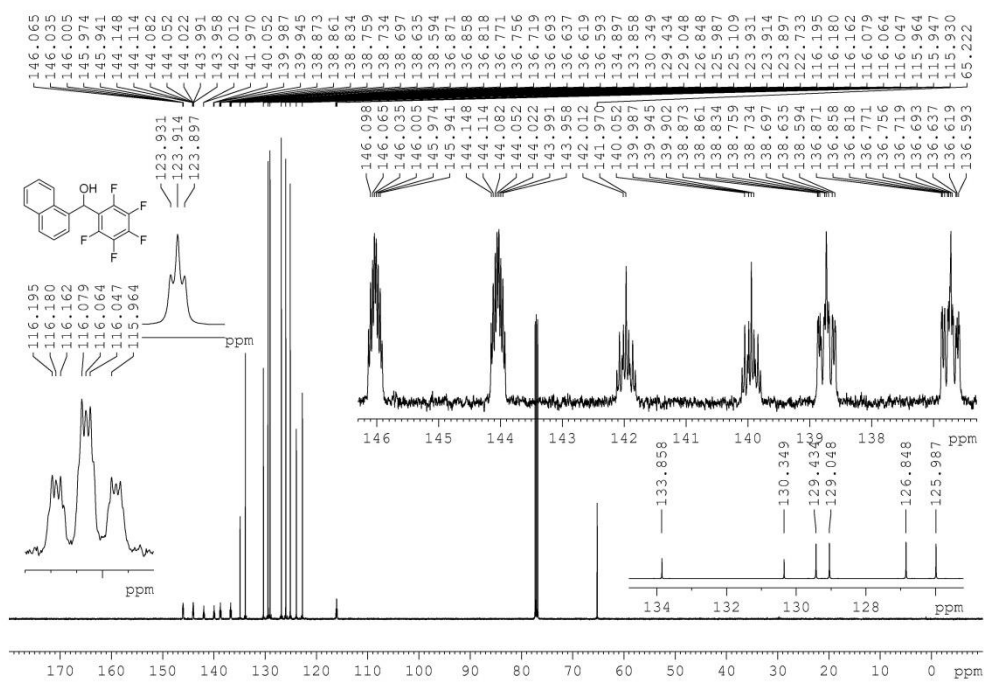

**Compound 3m:**  $^{19}\text{F}$  NMR spectrum (470 MHz,  $\text{CDCl}_3$ ).

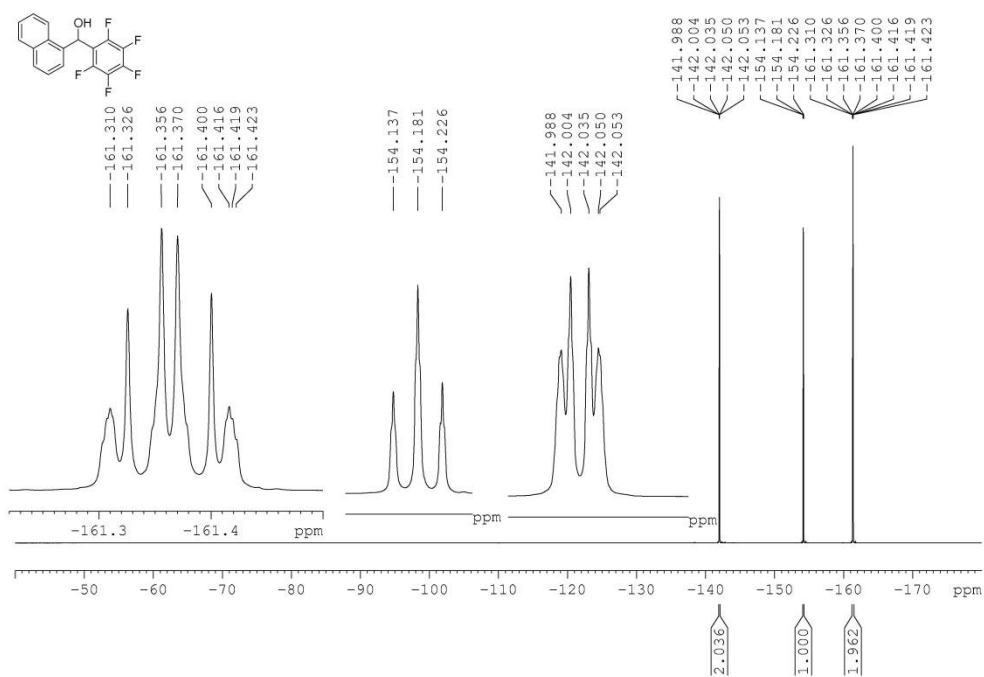

**Compound 3n:  $^1\text{H}$  NMR spectrum (500 MHz,  $\text{CDCl}_3$ ).**

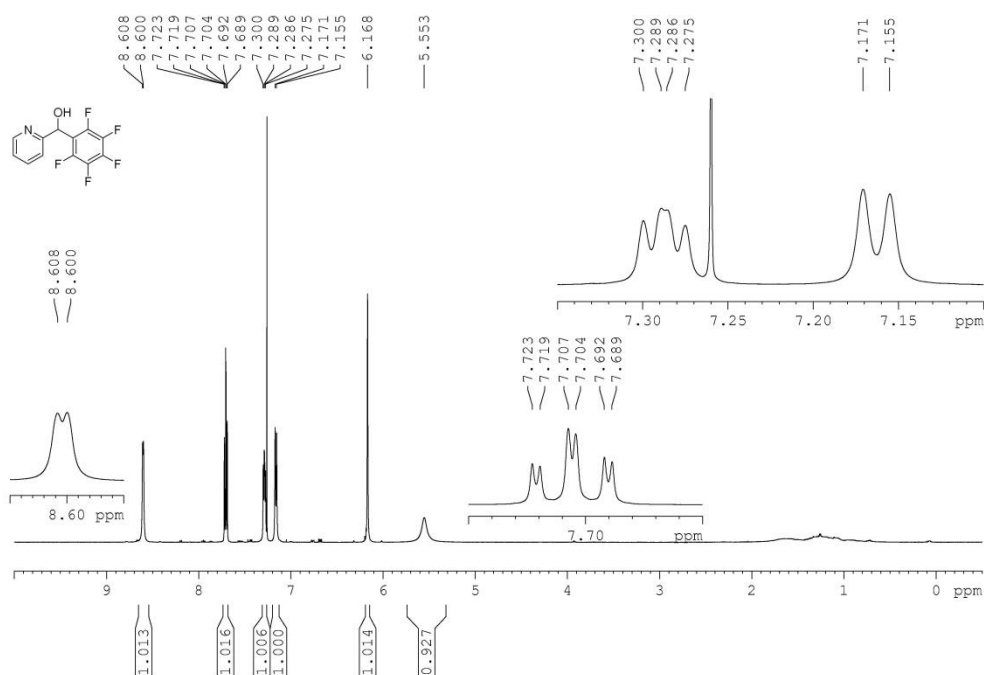

**Compound 3n:  $^{13}\text{C}\{^1\text{H}\}$  NMR spectrum (125 MHz,  $\text{CDCl}_3$ ).**

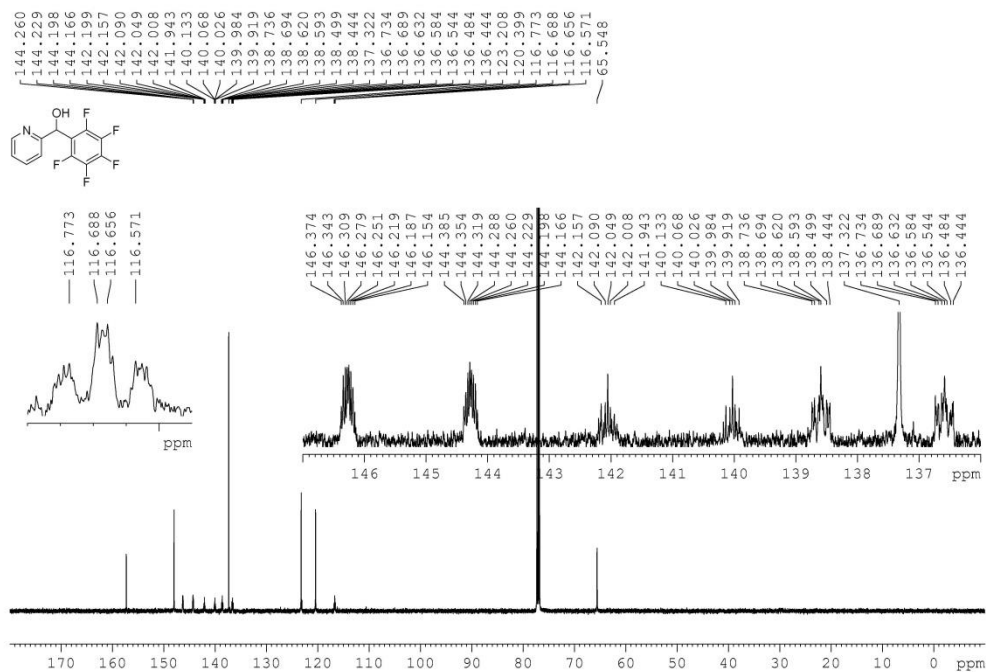



**Compound 3n:  $^{19}\text{F}$  NMR spectrum (470 MHz,  $\text{CDCl}_3$ ).**

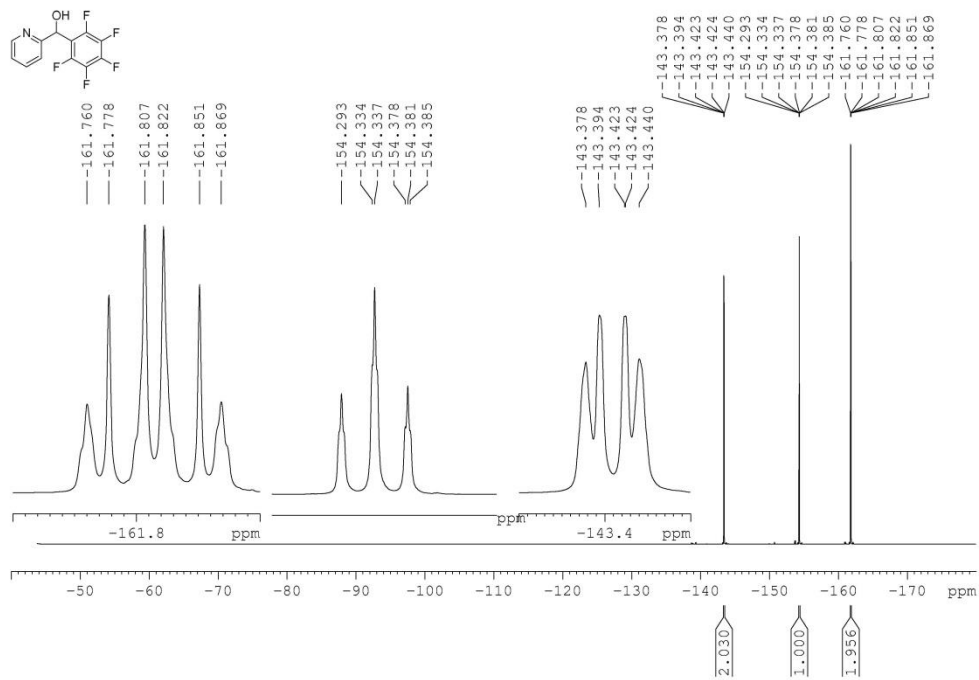

**Compound 3o:  $^1\text{H}$  NMR spectrum (500 MHz,  $\text{CDCl}_3$ ).**

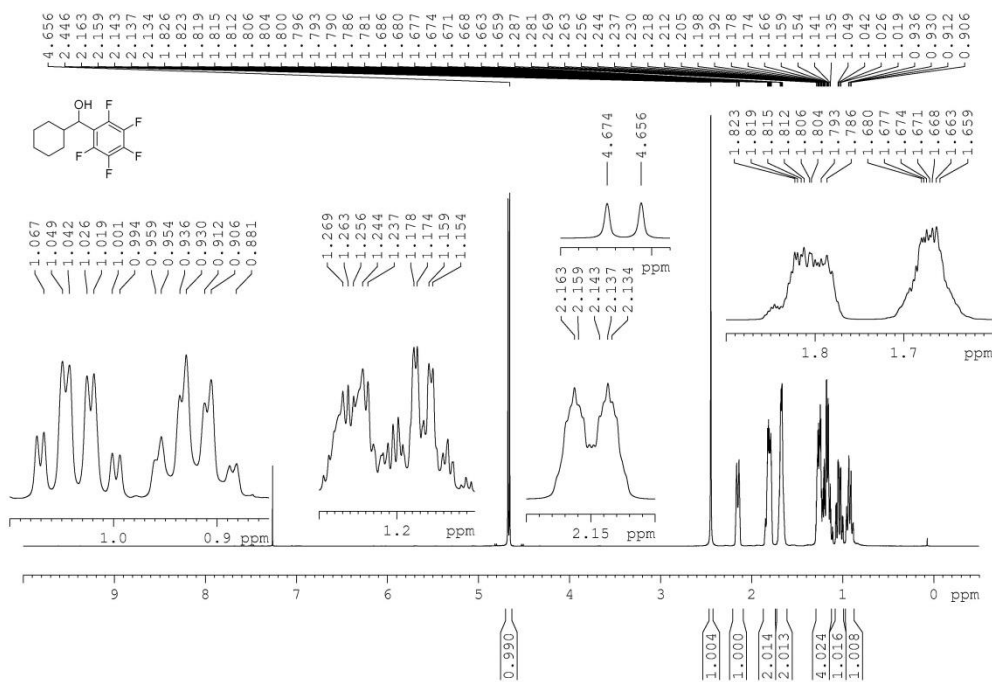

**Compound 3o:**  $^{13}\text{C}\{^1\text{H}\}$  NMR spectrum (125 MHz,  $\text{CDCl}_3$ ).

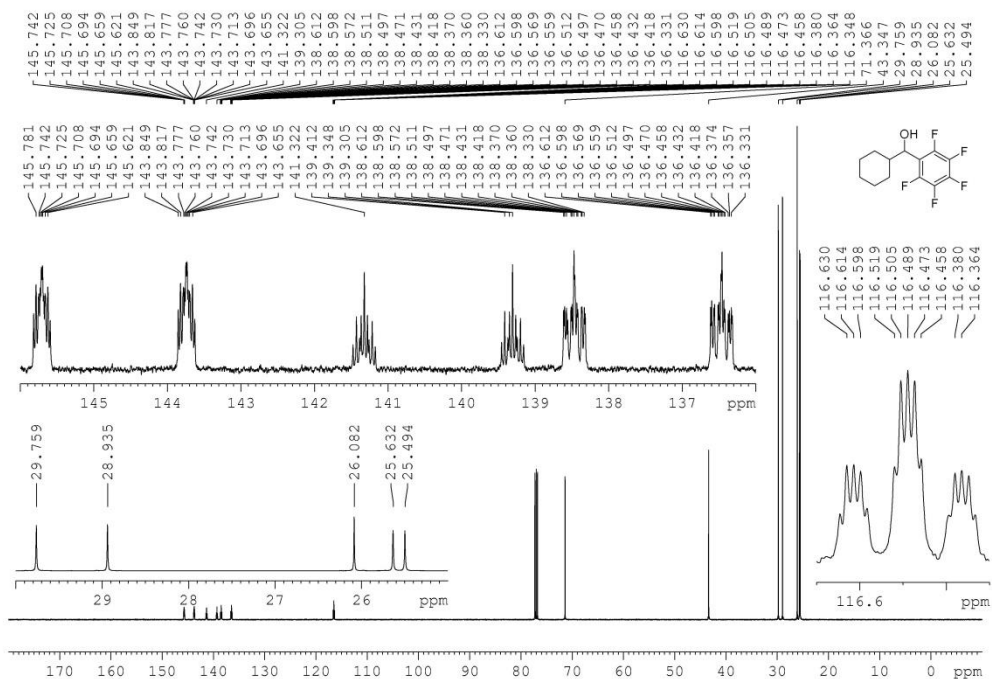

**Compound 3o:**  $^{19}\text{F}$  NMR spectrum (470 MHz,  $\text{CDCl}_3$ ).

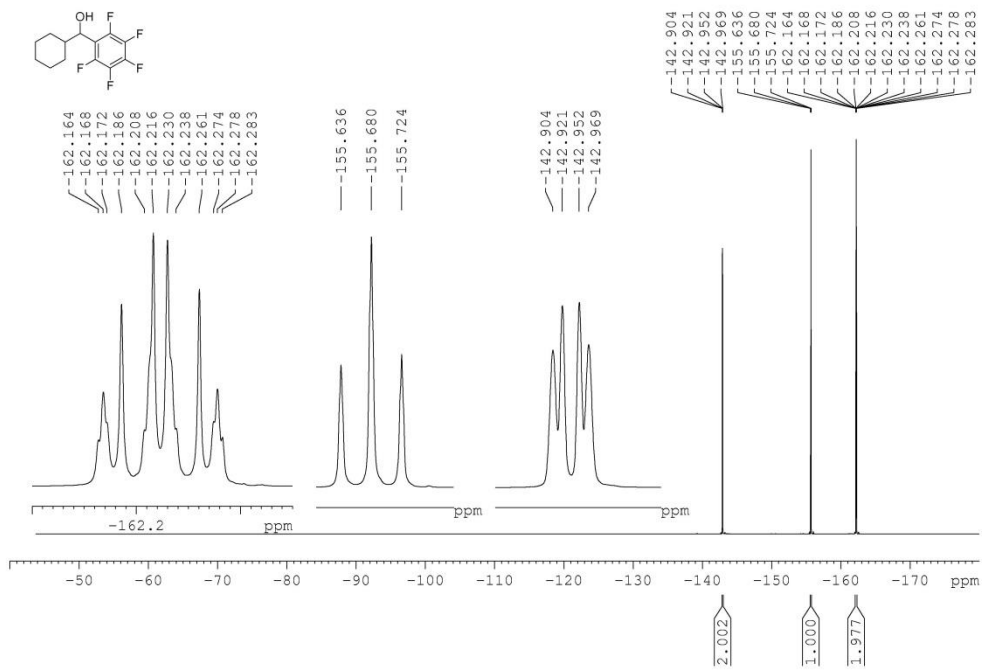

**Compound 3p: <sup>1</sup>H NMR spectrum (500 MHz, CDCl<sub>3</sub>).**

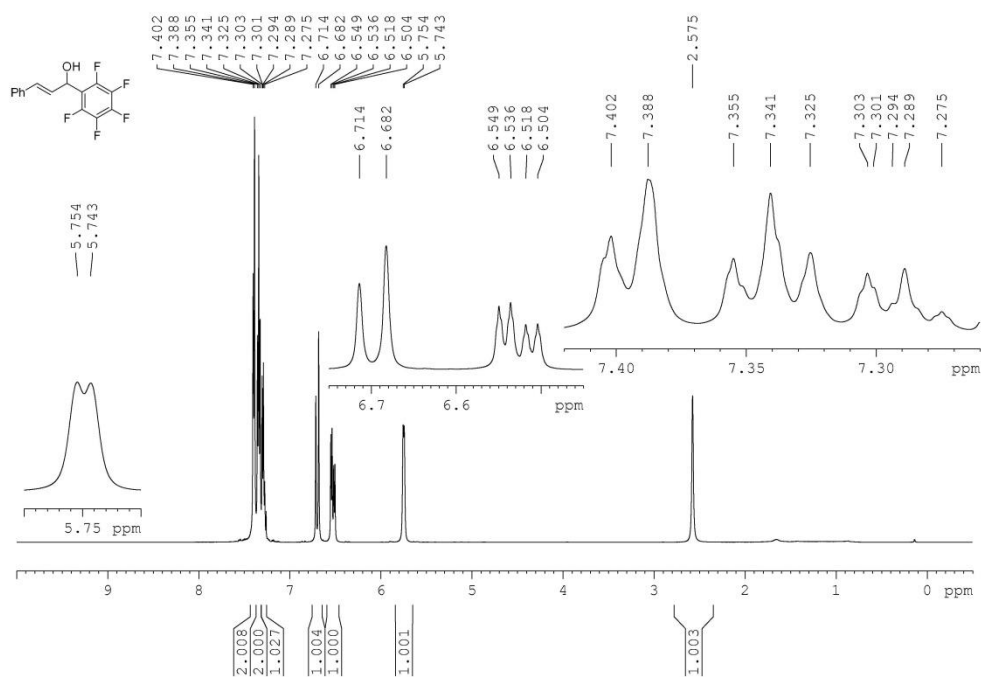

**Compound 3p: <sup>13</sup>C{<sup>1</sup>H} NMR spectrum (125 MHz, CDCl<sub>3</sub>).**

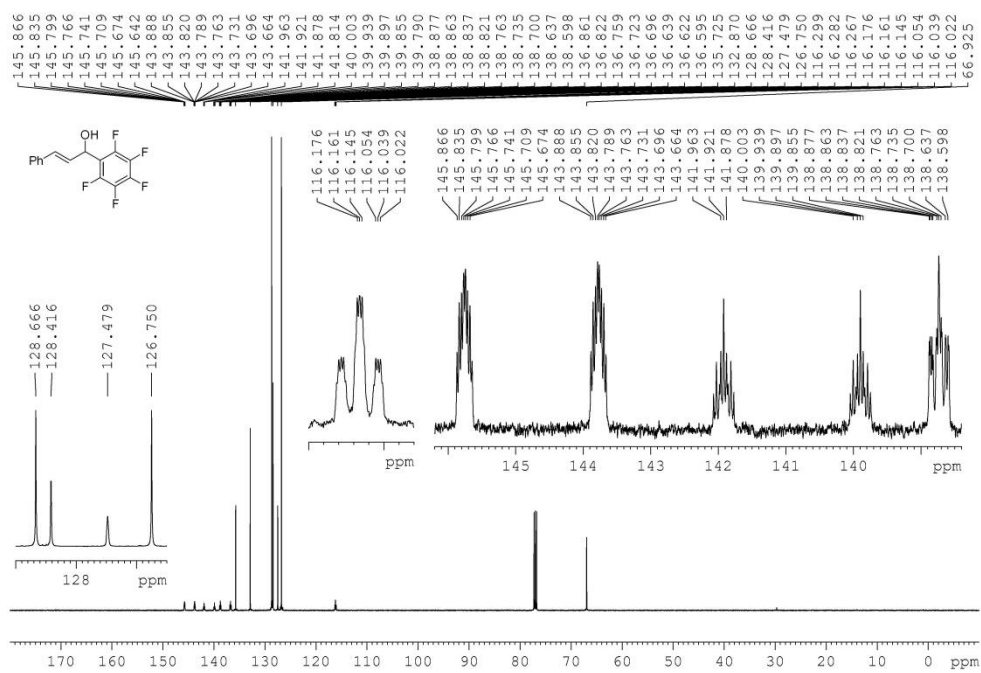

**Compound 3p:  $^{19}\text{F}$  NMR spectrum (470 MHz,  $\text{CDCl}_3$ ).**

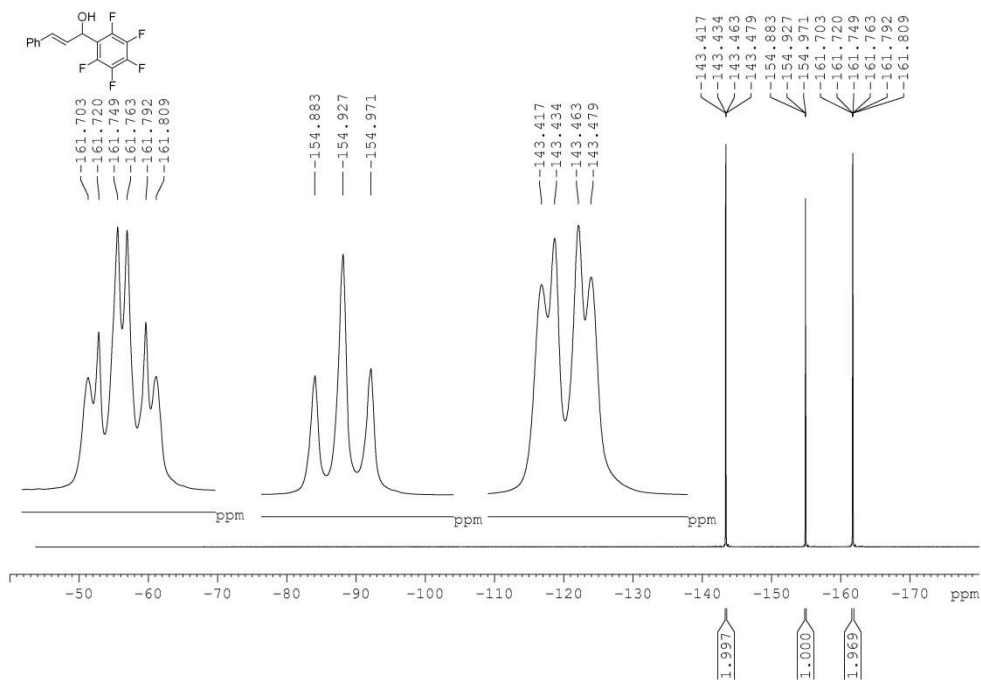

**Compound 3q:  $^1\text{H}$  NMR spectrum (500 MHz,  $\text{CDCl}_3$ ).**

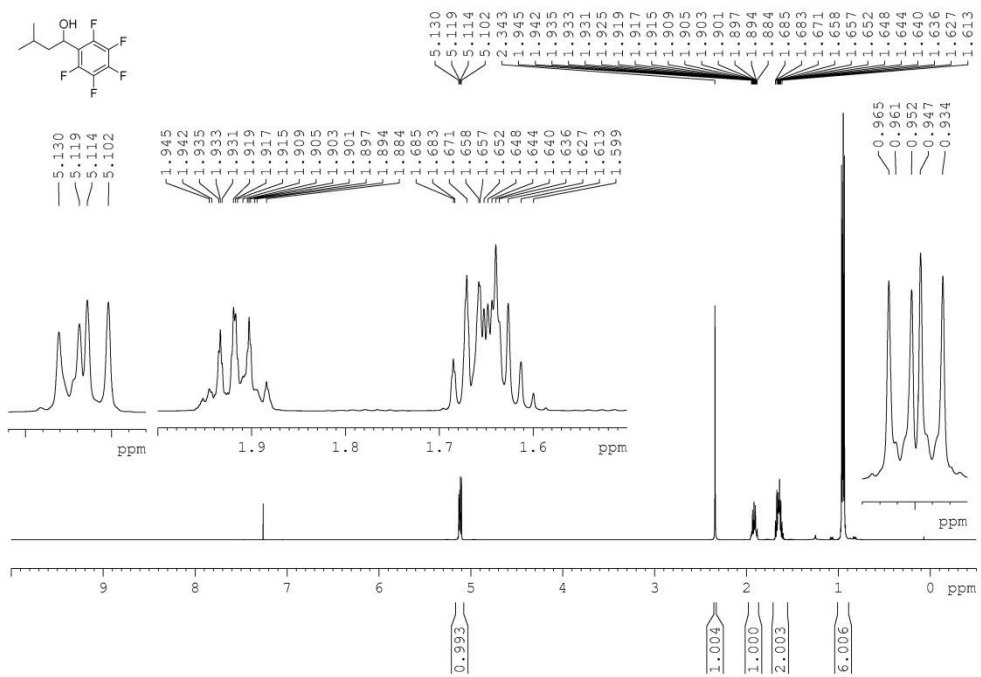

**Compound 3q:  $^{13}\text{C}\{^1\text{H}\}$  NMR spectrum (125 MHz,  $\text{CDCl}_3$ ).**

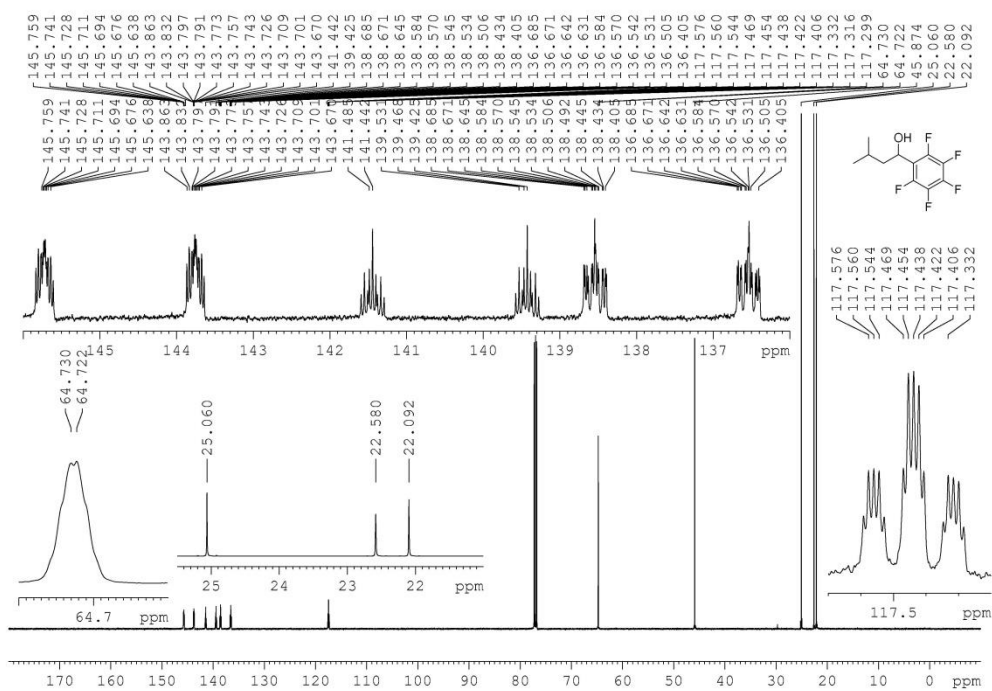

**Compound 3q:  $^{19}\text{F}$  NMR spectrum (470 MHz,  $\text{CDCl}_3$ ).**

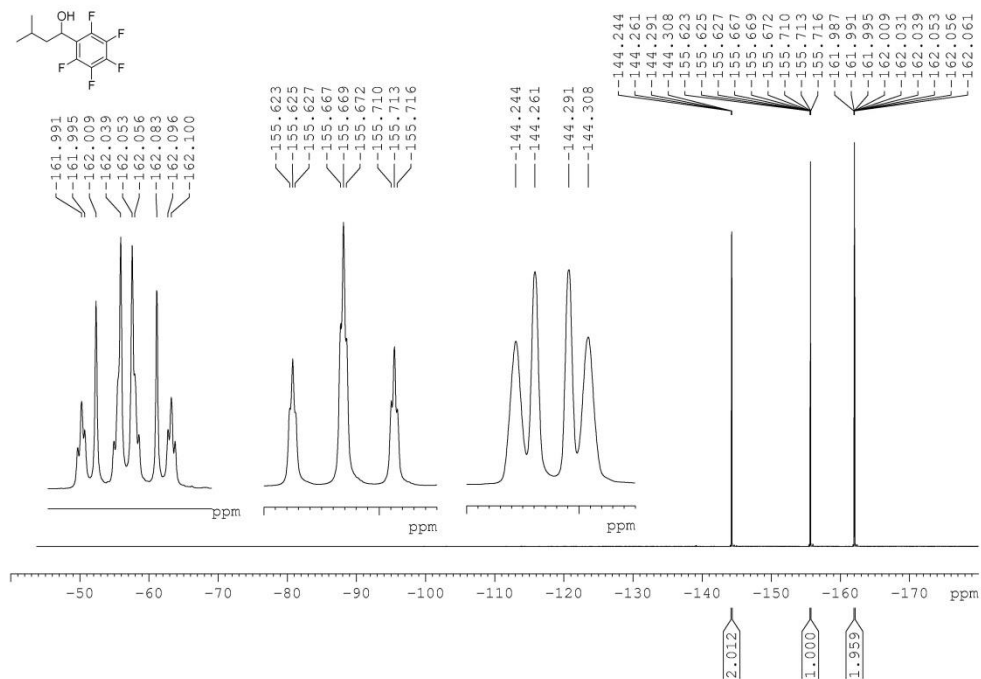

**Compound 3r:  $^1\text{H}$  NMR spectrum (500 MHz,  $\text{CDCl}_3$ ).**

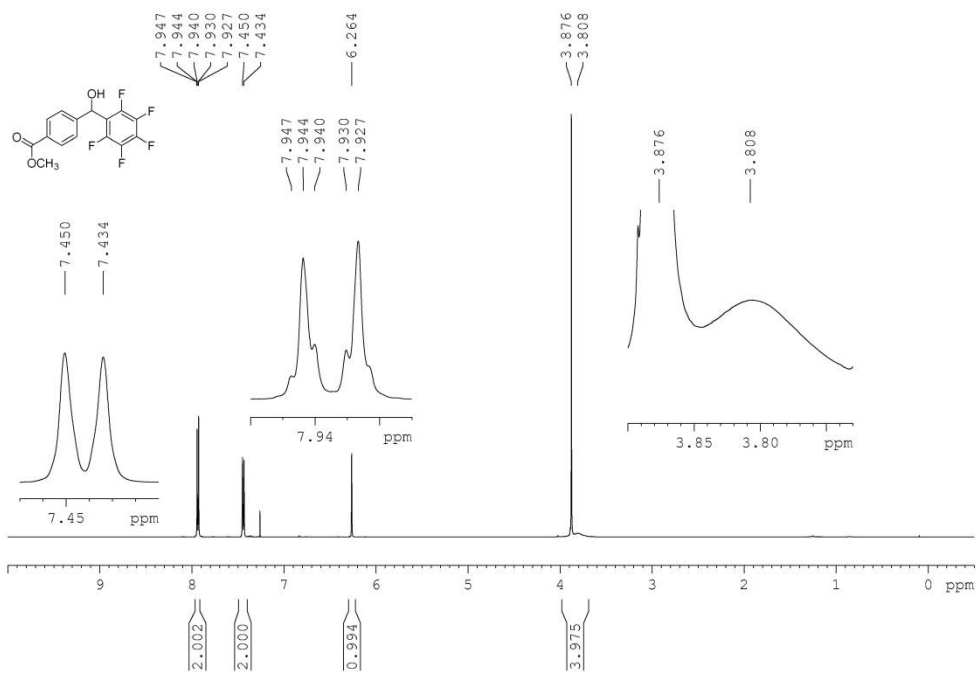

**Compound 3r:  $^{13}\text{C}\{^1\text{H}\}$  NMR spectrum (125 MHz,  $\text{CDCl}_3$ ).**

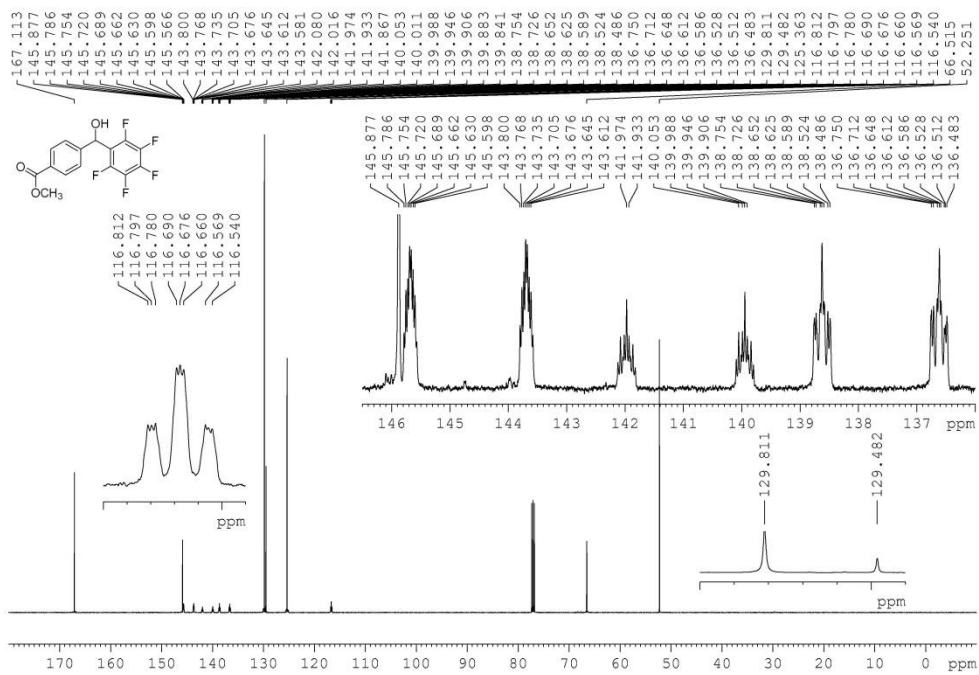

**Compound 3r:  $^{19}\text{F}$  NMR spectrum (470 MHz,  $\text{CDCl}_3$ ).**

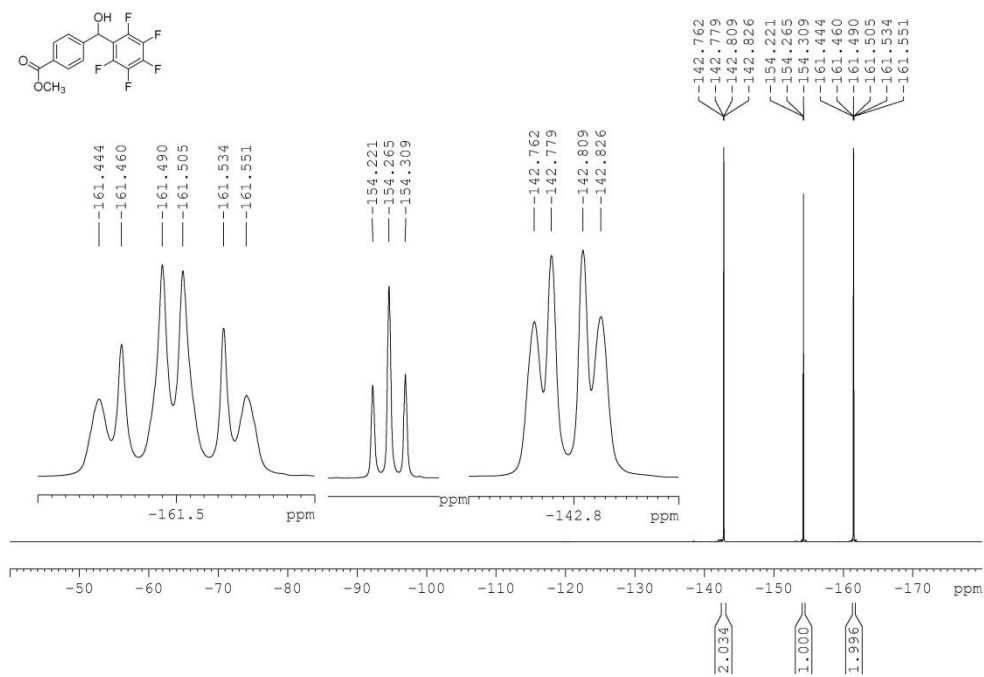

**Compound 3s:  $^1\text{H}$  NMR spectrum (500 MHz,  $\text{CDCl}_3$ ).**

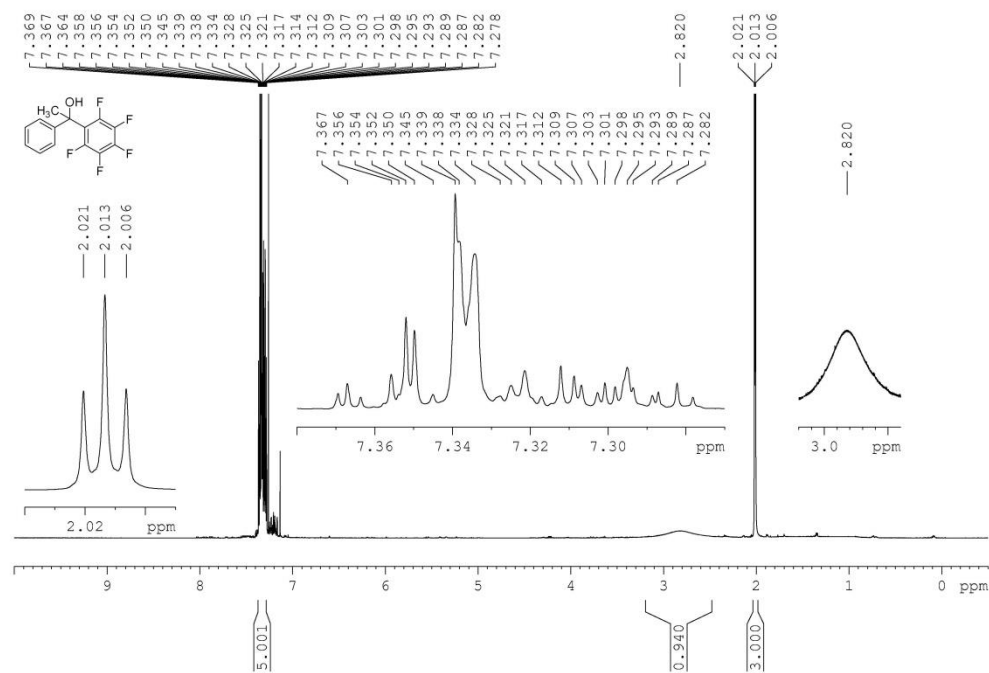

**Compound 3s:  $^{13}\text{C}\{^1\text{H}\}$  NMR spectrum (125 MHz,  $\text{CDCl}_3$ ).**

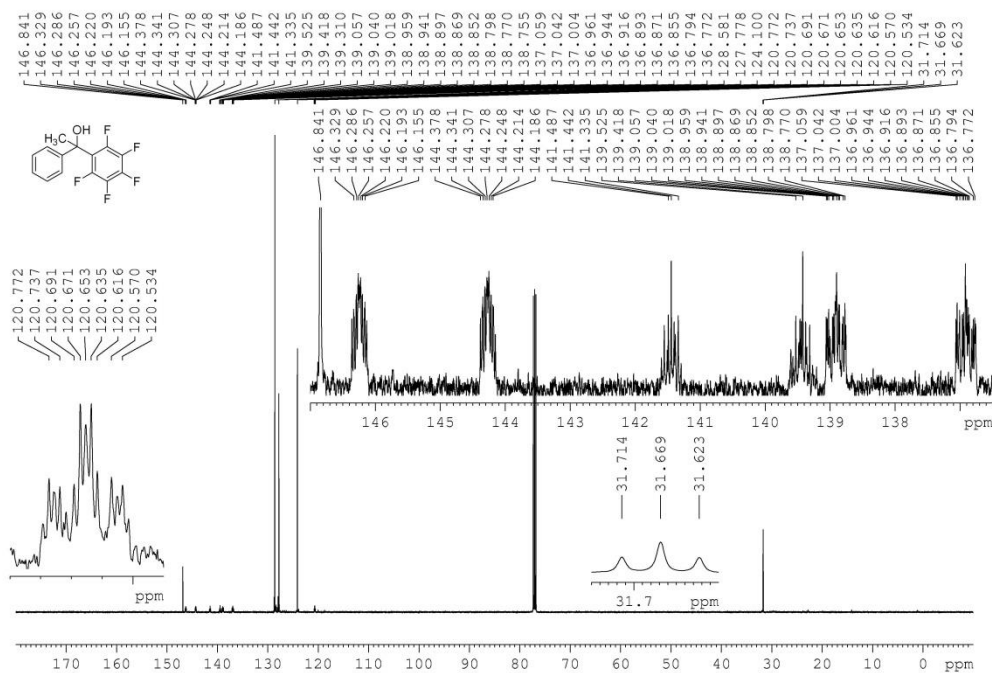

**Compound 3s:  $^{19}\text{F}$  NMR spectrum (470 MHz,  $\text{CDCl}_3$ ).**

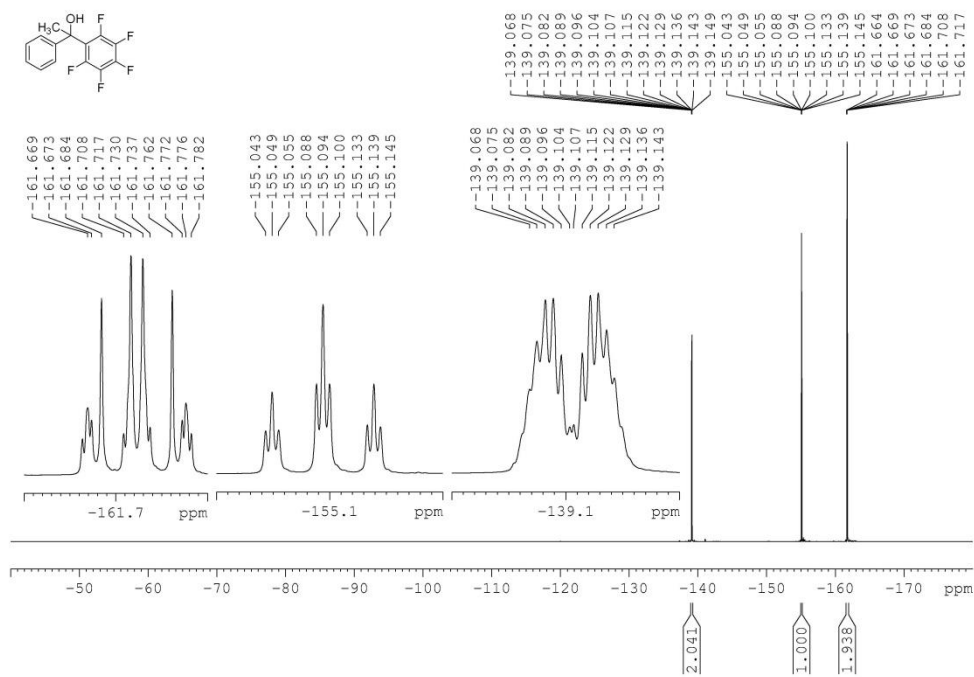















**Compound 3x:  $^1\text{H}$  NMR spectrum (500 MHz,  $\text{CDCl}_3$ ).**

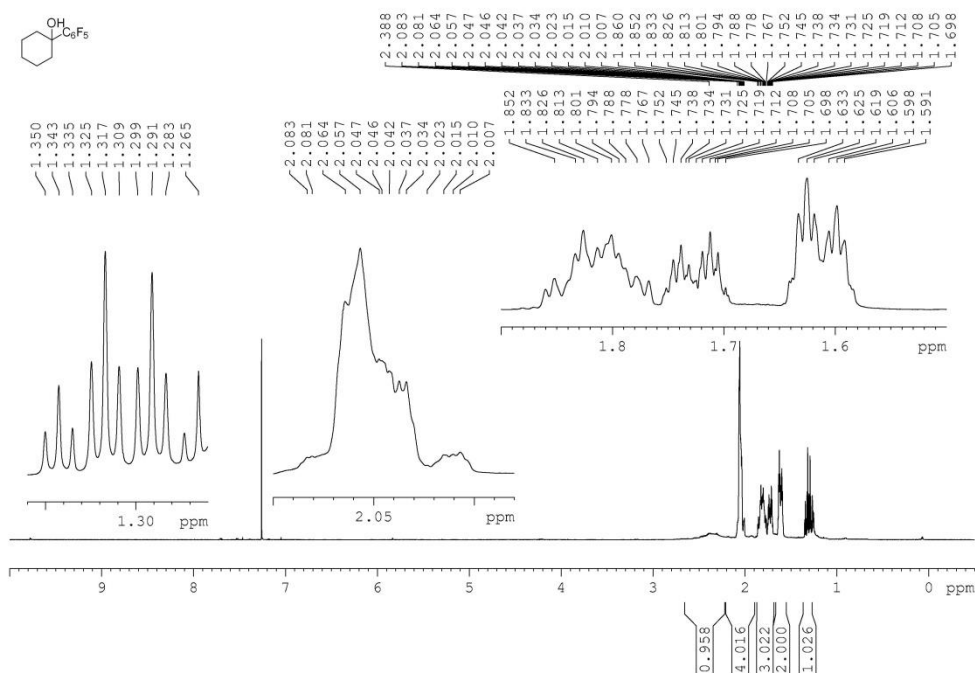

**Compound 3x:  $^{13}\text{C}\{^1\text{H}\}$  NMR spectrum (125 MHz,  $\text{CDCl}_3$ ).**

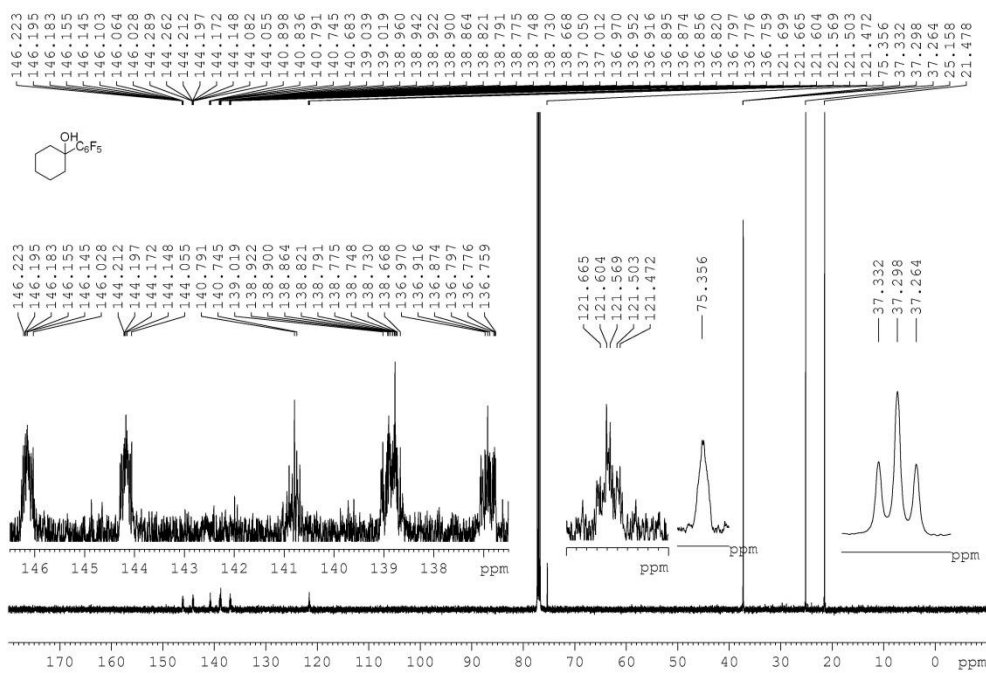

**Compound 3x:  $^{19}\text{F}$  NMR spectrum (470 MHz,  $\text{CDCl}_3$ ).**

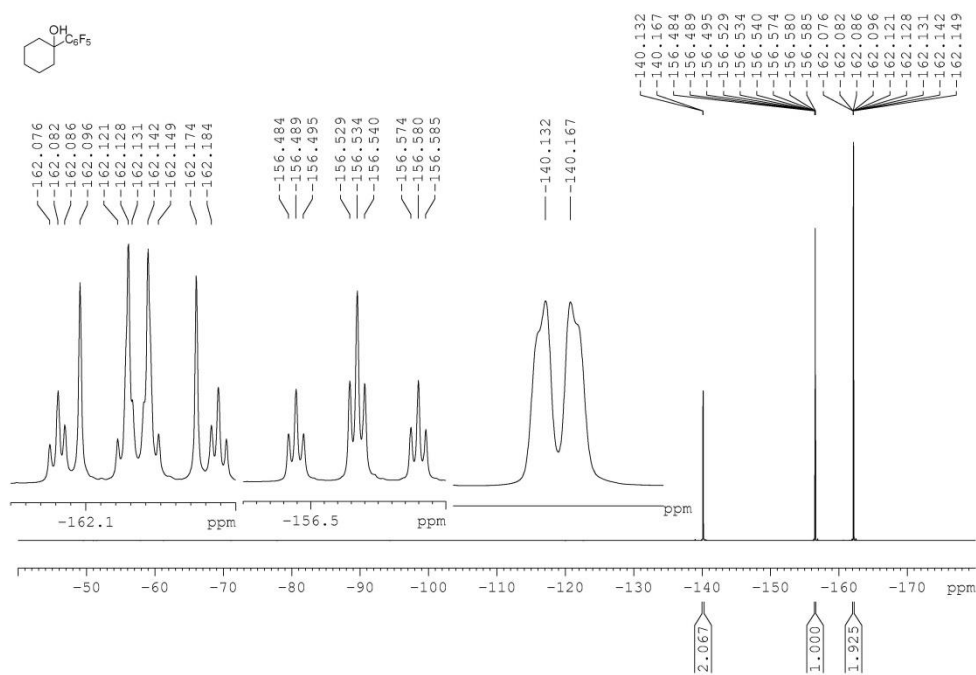

**Compound 4a:  $^1\text{H}$  NMR spectrum (500 MHz,  $\text{CDCl}_3$ ).**

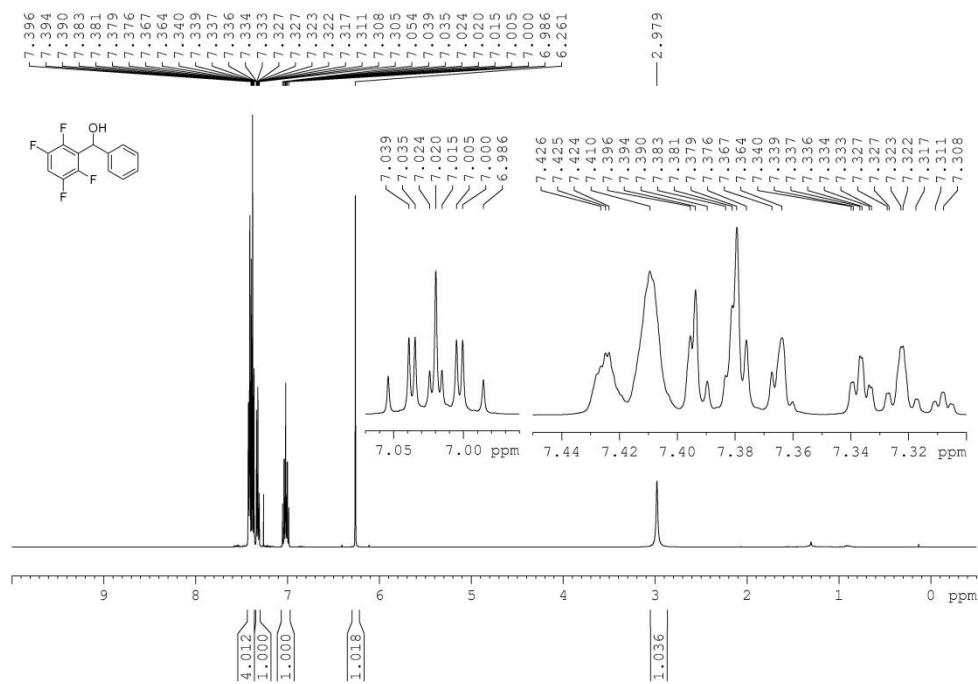



**Compound 4a:**  $^{13}\text{C}\{^1\text{H}\}$  NMR spectrum (125 MHz,  $\text{CDCl}_3$ ).

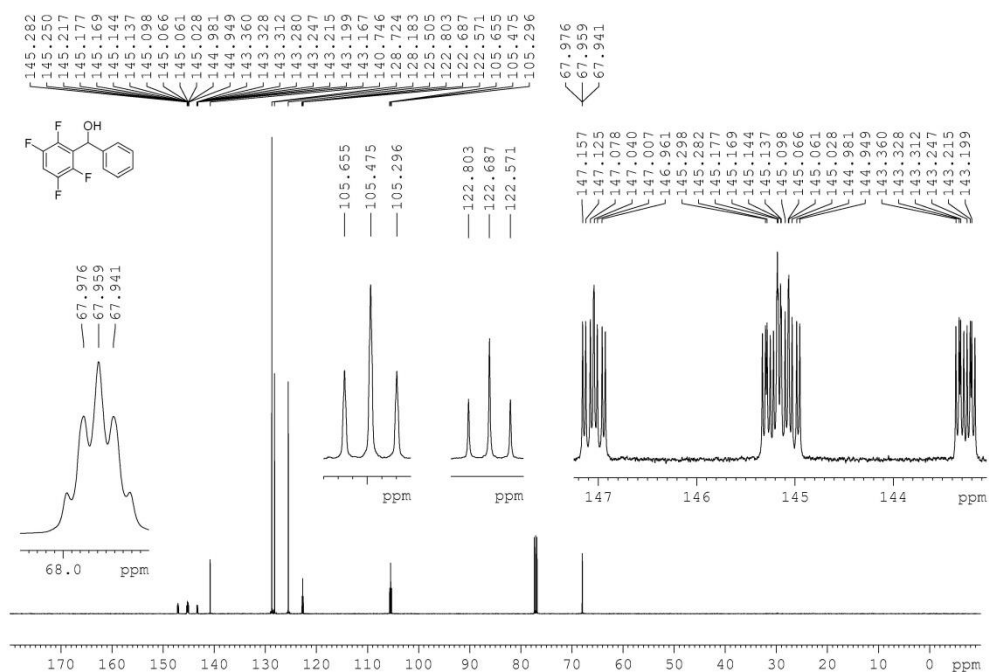

**Compound 4a:**  $^{19}\text{F}$  NMR spectrum (470 MHz,  $\text{CDCl}_3$ ).

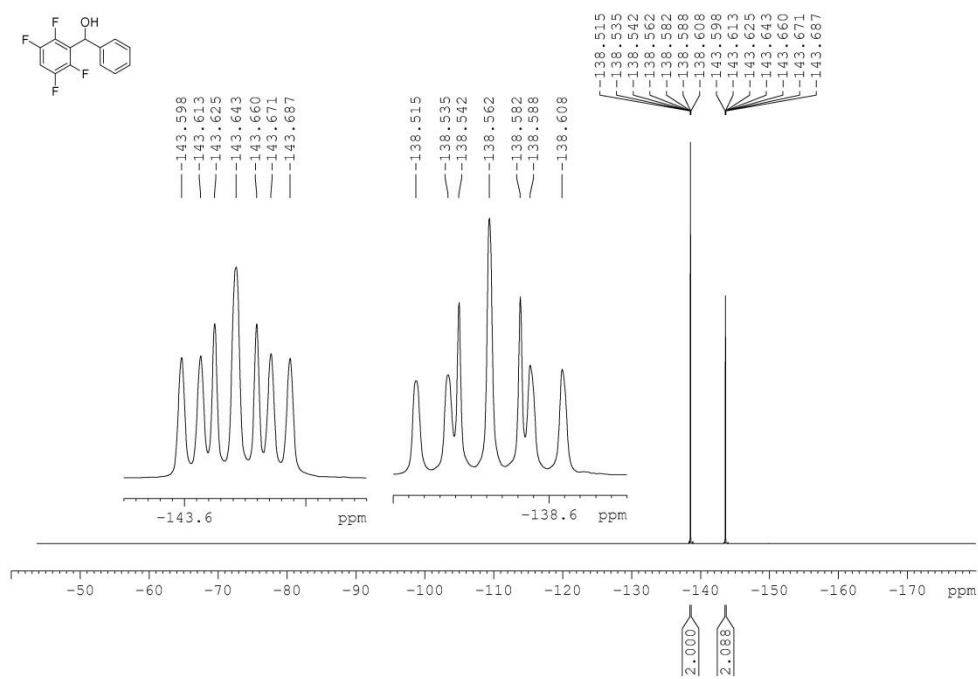

**Compound 4b:  $^1\text{H}$  NMR spectrum (500 MHz,  $\text{CDCl}_3$ ).**

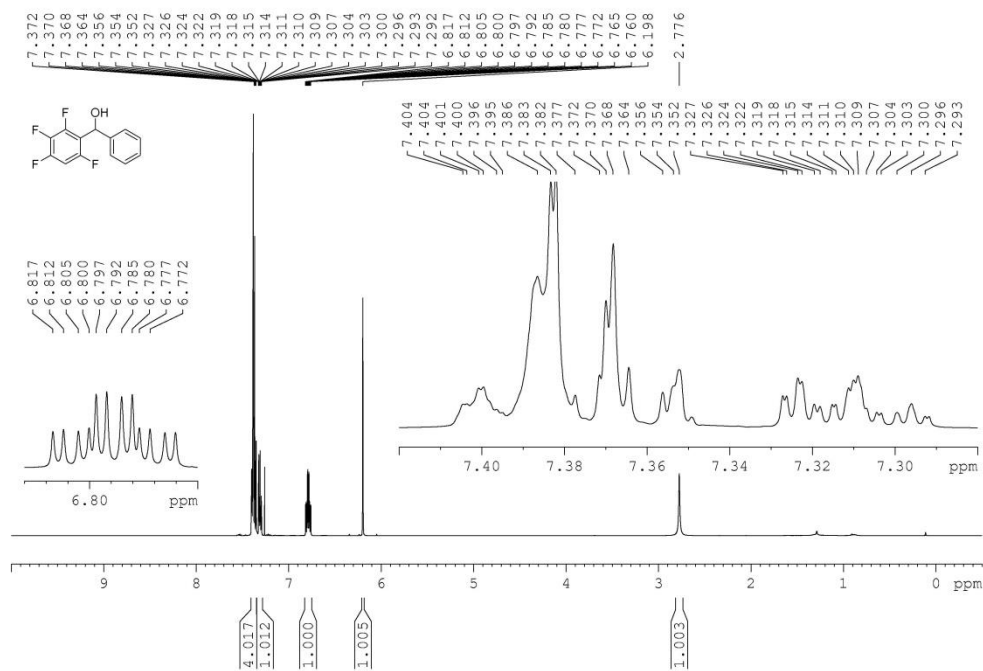

**Compound 4b:  $^{13}\text{C}\{^1\text{H}\}$  NMR spectrum (125 MHz,  $\text{CDCl}_3$ ).**

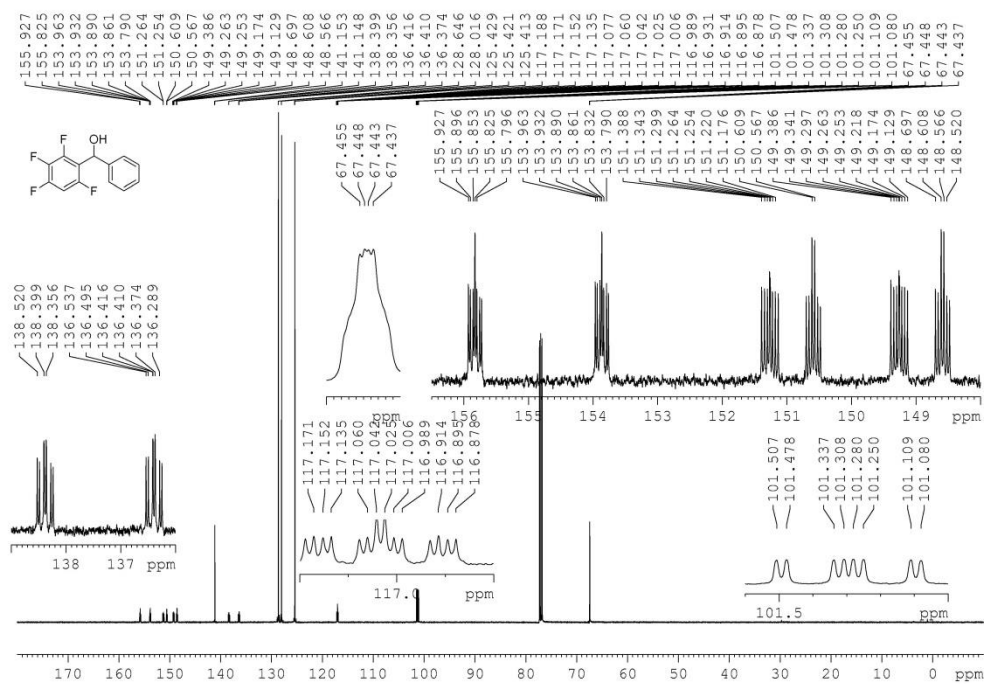



**Compound 4c:  $^{13}\text{C}\{^1\text{H}\}$  NMR spectrum (125 MHz,  $\text{CDCl}_3$ ).**

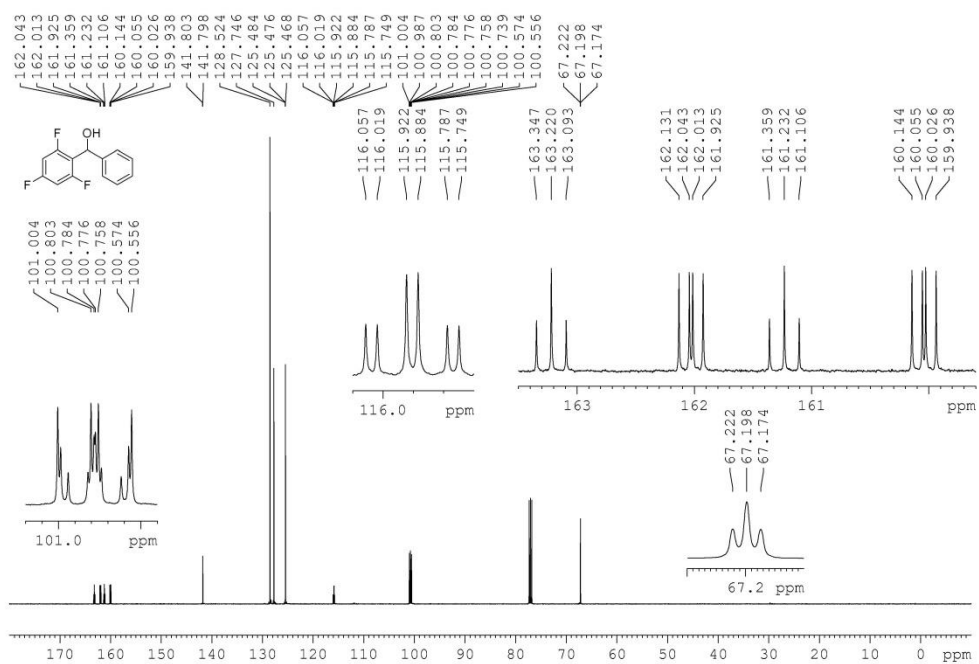

**Compound 4c:  $^{19}\text{F}$  NMR spectrum (470 MHz,  $\text{CDCl}_3$ ).**

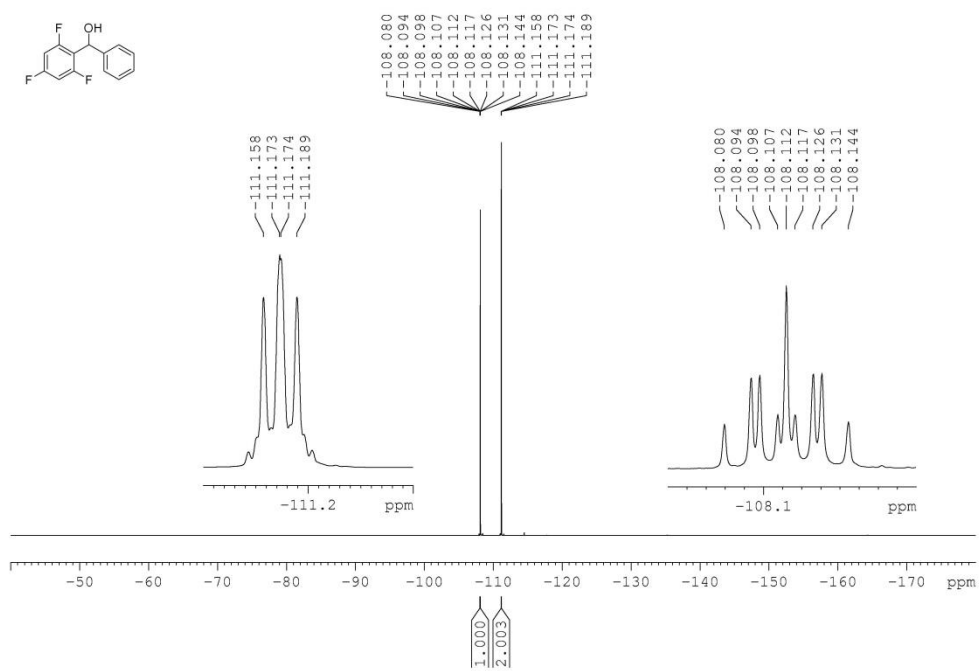











**Compound 4f:  $^{19}\text{F}$  NMR spectrum (470 MHz,  $\text{CDCl}_3$ ).**

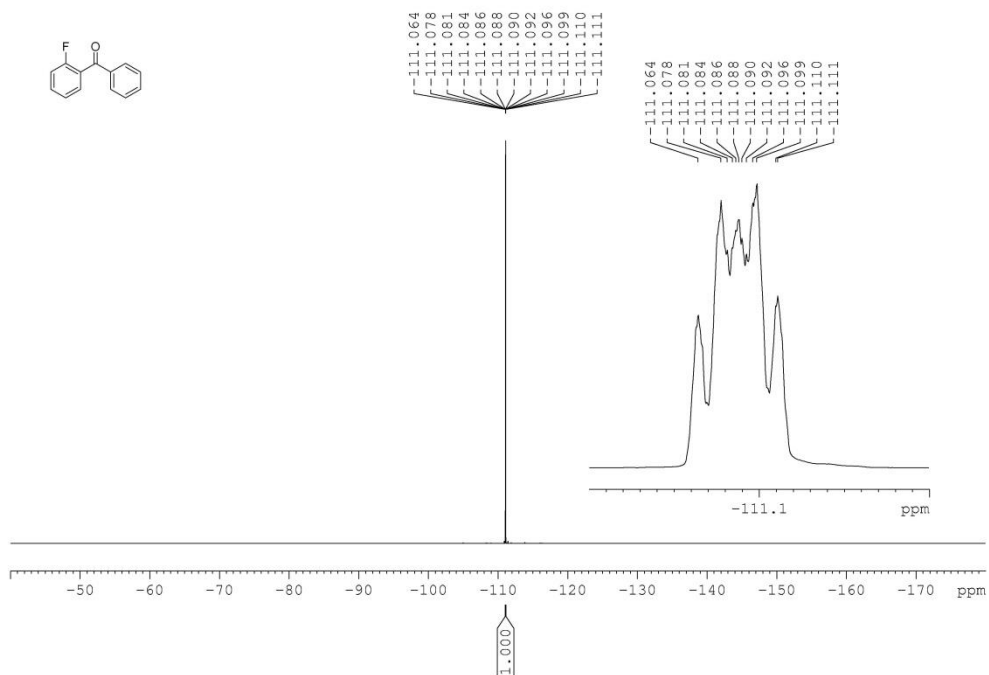

**Compound 4g:  $^1\text{H}$  NMR spectrum (500 MHz,  $\text{CDCl}_3$ ).**

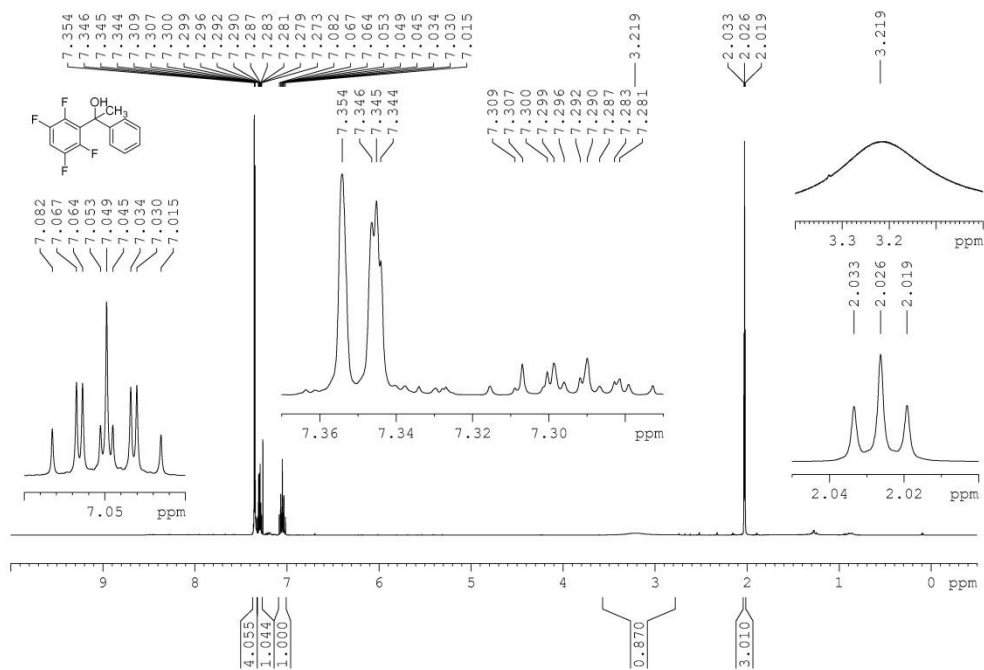

**Compound 4g:  $^{13}\text{C}\{^1\text{H}\}$  NMR spectrum (125 MHz,  $\text{CDCl}_3$ ).**

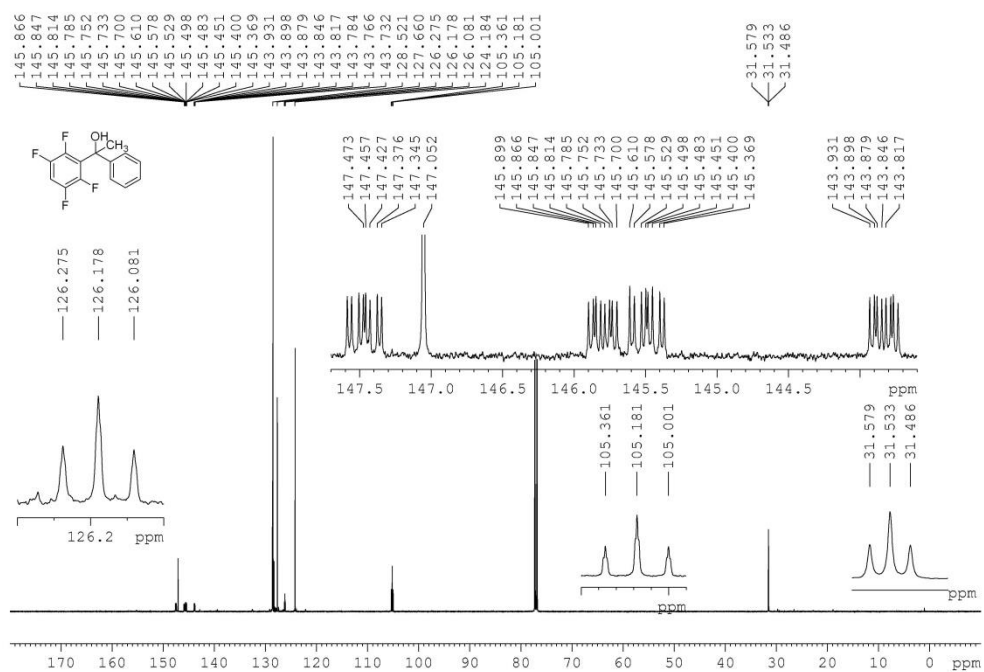

**Compound 4g:  $^{19}\text{F}$  NMR spectrum (470 MHz,  $\text{CDCl}_3$ ).**

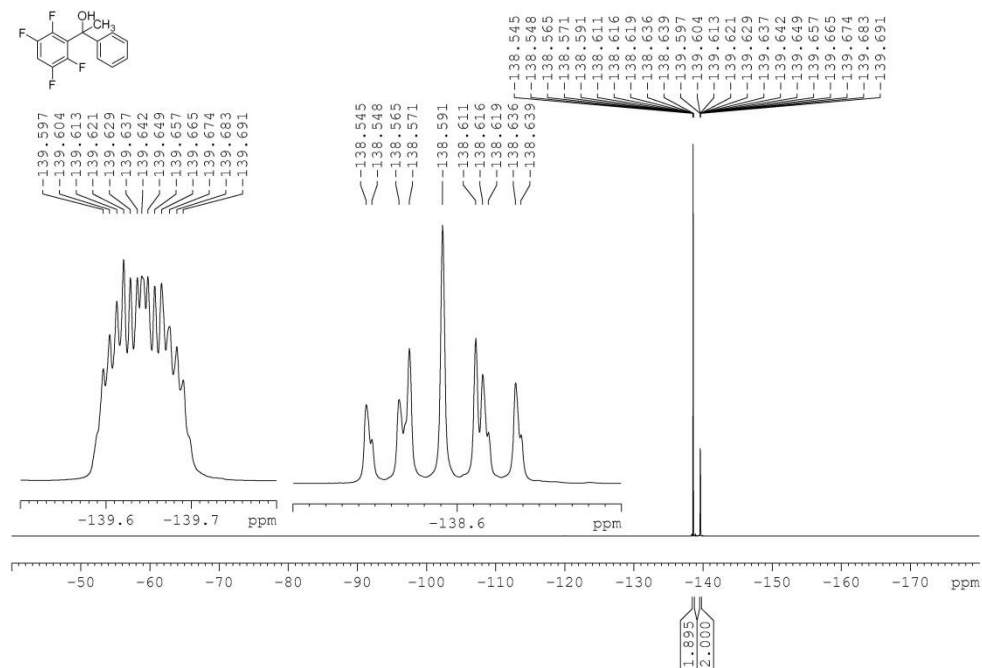

## VI. Single Crystal X-Ray Diffraction

Single crystals suitable for X-ray diffraction were selected, coated in perfluoropolyether oil, and mounted on MiTeGen sample holders. Diffraction data were collected on Bruker X8 Apex II 4-circle diffractometers with CCD area detectors using Mo-K $\alpha$  radiation monochromated by graphite or multi-layer focusing mirrors. The crystals were cooled using an Oxford Cryostream low-temperature device. Diffraction data were collected at 100 K. The images were processed and corrected for Lorentz-polarization effects and absorption effects by employing the Bruker software packages. The structure was solved using the intrinsic phasing method (SHELXT)<sup>[7d]</sup> and expanded using Fourier techniques. All the non-hydrogen atoms were refined in anisotropic approximation, with hydrogen atoms ‘riding’ in idealized positions, by full-matrix least squares against  $F^2$  on all data, using SHELXL<sup>[7a,c]</sup> software and the SHELXLE<sup>[7b]</sup> graphical user interface. Crystal data and experimental details are listed in Table S1; full structural information has been deposited with the Cambridge Crystallographic Data Centre. CCDC-2045652 (**3f**), 2045653 (**3l**), 2045654 (**3m**), 2045655 (**3n**), and 2045656 (**4d**).

**Table S1. Single-crystal X-ray diffraction data and structure refinements of 3f, 3l, 3m, 3n, and 4d.**

| Compounds                                                      | <b>3f</b>                                         | <b>3l</b>                                                    | <b>3m</b>                                       | <b>3n</b>                                        | <b>4d</b>                                        |
|----------------------------------------------------------------|---------------------------------------------------|--------------------------------------------------------------|-------------------------------------------------|--------------------------------------------------|--------------------------------------------------|
| CCDC number                                                    | 2045652                                           | 2045653                                                      | 2045654                                         | 2045655                                          | 2045656                                          |
| Empirical formula                                              | C <sub>13</sub> H <sub>6</sub> BrF <sub>5</sub> O | C <sub>14</sub> H <sub>7</sub> F <sub>5</sub> O <sub>2</sub> | C <sub>17</sub> H <sub>9</sub> F <sub>5</sub> O | C <sub>12</sub> H <sub>6</sub> F <sub>5</sub> NO | C <sub>13</sub> H <sub>10</sub> F <sub>2</sub> O |
| Formula weight (g mol <sup>-1</sup> )                          | 353.09                                            | 302.20                                                       | 324.24                                          | 275.18                                           | 220.21                                           |
| Temperature (K)                                                | 100(2)                                            | 100(2)                                                       | 100(2)                                          | 100(2)                                           | 100(2)                                           |
| Radiation, λ (Å)                                               | Mo-Kα 0.71073                                     | Mo-Kα 0.71073                                                | Mo-Kα 0.71073                                   | Mo-Kα 0.71073                                    | Mo-Kα 0.71073                                    |
| Crystal color, habit                                           | Colorless, block                                  | Colorless, block                                             | Colorless, block                                | Colorless, block                                 | Colorless, block                                 |
| Crystal size (mm <sup>3</sup> )                                | 0.17×0.26×0.34                                    | 0.57×0.55×0.28                                               | 0.30×0.33×0.41                                  | 0.54×0.39×0.23                                   | 0.44×0.35×0.22                                   |
| Crystal system                                                 | Triclinic                                         | Triclinic                                                    | Monoclinic                                      | Monoclinic                                       | Monoclinic                                       |
| Space group                                                    | <i>P</i> 1                                        | <i>P</i> $\bar{1}$                                           | <i>P</i> 2 <sub>1</sub> / <i>c</i>              | <i>C</i> 2/ <i>c</i>                             | <i>C</i> 2/ <i>c</i>                             |
| <i>Unit cell dimensions</i>                                    |                                                   |                                                              |                                                 |                                                  |                                                  |
| <i>a</i> (Å)                                                   | 14.964(6)                                         | 6.9938(7)                                                    | 8.422(5)                                        | 22.136(7)                                        | 20.058(3)                                        |
| <i>b</i> (Å)                                                   | 19.077(8)                                         | 7.7520(8)                                                    | 23.486(13)                                      | 10.023(3)                                        | 10.796(3)                                        |
| <i>c</i> (Å)                                                   | 19.488(8)                                         | 11.9114(12)                                                  | 14.108(9)                                       | 9.945(3)                                         | 9.2708(17)                                       |
| α (°)                                                          | 90.142(12)                                        | 71.116(2)                                                    | 90                                              | 90                                               | 90                                               |
| β (°)                                                          | 109.530(7)                                        | 87.313(2)                                                    | 99.583(17)                                      | 105.237(8)                                       | 98.046(8)                                        |
| γ (°)                                                          | 106.160(7)                                        | 82.190(2)                                                    | 90                                              | 90                                               | 90                                               |
| Volume (Å <sup>3</sup> )                                       | 5008(4)                                           | 605.36(11)                                                   | 2751(3)                                         | 2128.8(12)                                       | 1987.9(7)                                        |
| <i>Z</i>                                                       | 16                                                | 2                                                            | 8                                               | 8                                                | 8                                                |
| Calc. density (Mg·m <sup>-3</sup> )                            | 1.873                                             | 1.658                                                        | 1.565                                           | 1.717                                            | 1.472                                            |
| μ (mm <sup>-1</sup> )                                          | 3.337                                             | 0.161                                                        | 0.143                                           | 0.170                                            | 0.117                                            |
| <i>F</i> (000)                                                 | 2752                                              | 304                                                          | 1312                                            | 1104                                             | 912                                              |
| θ range (°)                                                    | 1.493 - 26.370                                    | 2.800 - 27.103                                               | 1.701 - 26.369                                  | 1.907 - 26.371                                   | 2.051 - 26.372                                   |
| Reflections collected                                          | 165215                                            | 25240                                                        | 62274                                           | 51503                                            | 15767                                            |
| Independent reflections                                        | 40933                                             | 2658                                                         | 5627                                            | 2178                                             | 2035                                             |
| Minimum/maximum transmission                                   | 0.486 / 0.533                                     | 0.679 / 0.717                                                | 0.621 / 0.702                                   | 0.711 / 0.746                                    | 0.691 / 0.746                                    |
| Parameters / restraints                                        | 2963 / 208                                        | 191 / 0                                                      | 618 / 615                                       | 173 / 0                                          | 148 / 0                                          |
| Goof on <i>F</i> <sup>2</sup>                                  | 1.003                                             | 1.070                                                        | 1.089                                           | 1.072                                            | 1.037                                            |
| <i>R</i> <sub>1</sub> [ <i>I</i> >2σ( <i>I</i> )]              | 0.0351                                            | 0.0388                                                       | 0.0945                                          | 0.0300                                           | 0.0397                                           |
| <i>wR</i> <sup>2</sup> (all data)                              | 0.0755                                            | 0.1099                                                       | 0.2297                                          | 0.0842                                           | 0.1057                                           |
| Maximum/minimum residual electron density (e·Å <sup>-3</sup> ) | 1.476 / -0.515                                    | 0.475 / -0.204                                               | 0.757 / -0.594                                  | 0.282 / -0.194                                   | 0.484 / -0.217                                   |

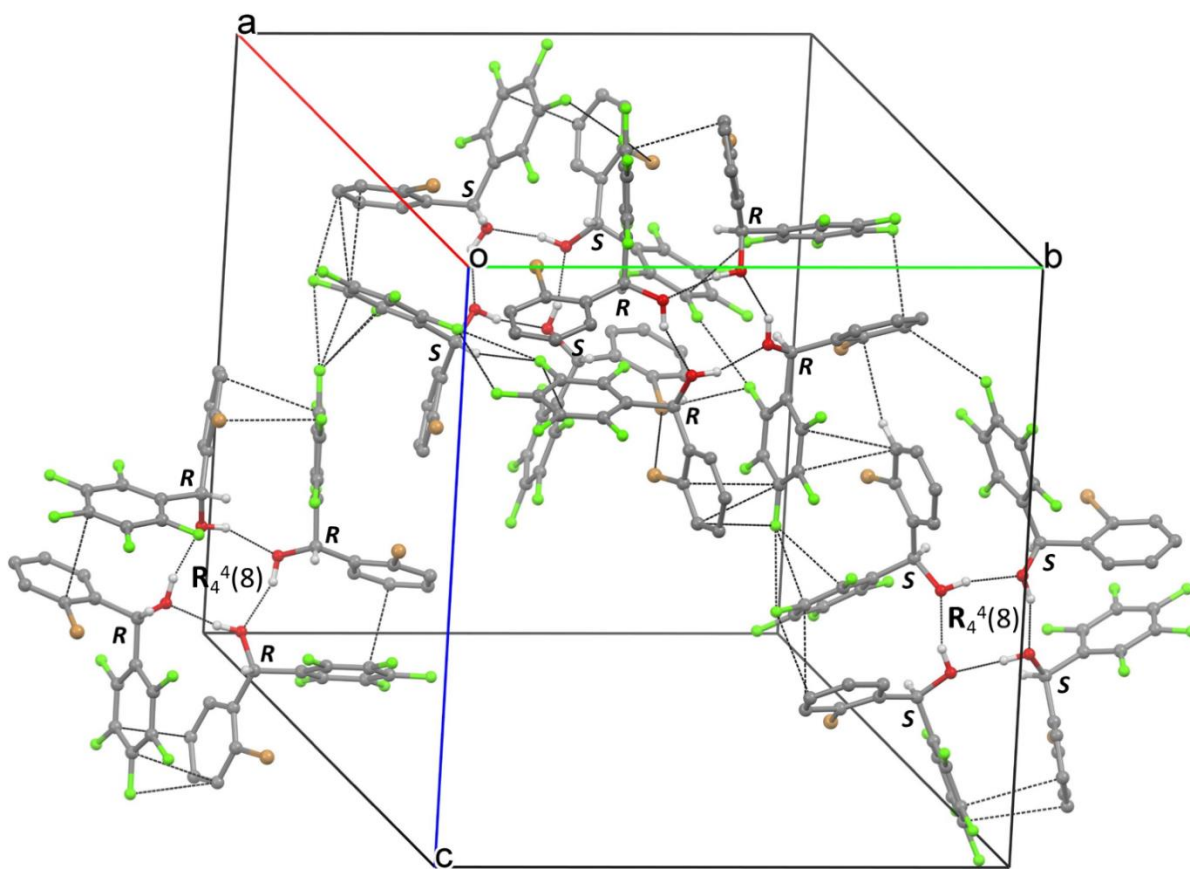

**Figure S1.** The asymmetric unit of **3f** and the unit cell metric are drawn. It consists of a racemic mixture of 16 symmetry-independent molecules which form four hydrogen-bonded tetramers of  $R_4^4(8)$  graphset. The chirality of all 16 molecules are shown. Each tetramer contains only one type of chirality. In addition to hydrogen bonding interactions, other interactions, such as  $\pi \cdots \pi$ ,  $C-F \cdots \pi(C)$ ,  $C-H \cdots \pi$ ,  $F \cdots F$ ,  $F \cdots Br$ , etc. are also observed. The interplanar separations and angles between the phenyl and pentafluorophenyl rings lie in the range of 3.281(7) – 3.687(14) Å and 4.96(19) – 16.8(3)°, respectively.

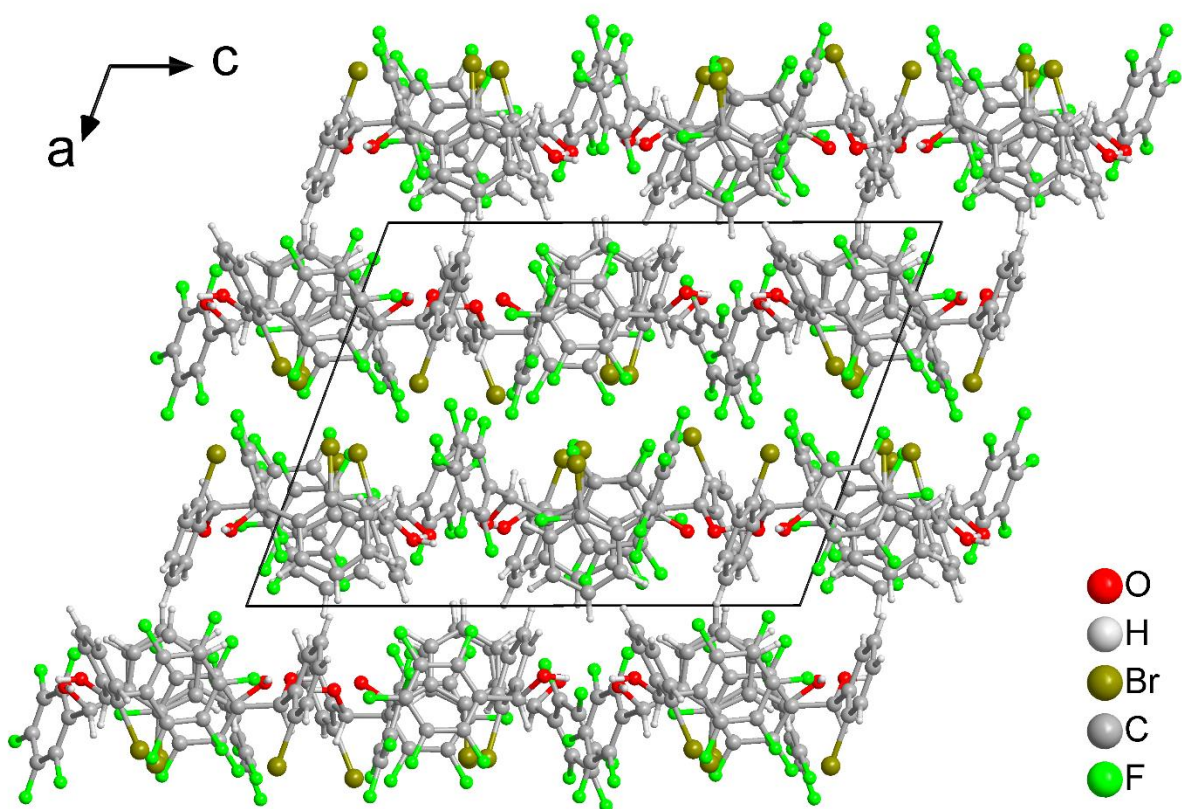

**Figure S2.** Tetramers of **3f** are arranged in sheets parallel to the  $\vec{b}, \vec{c}$ -plane with bromine atoms all pointing up or down within a sheet. Parallel sheets face each other either with the bromine atoms or without.

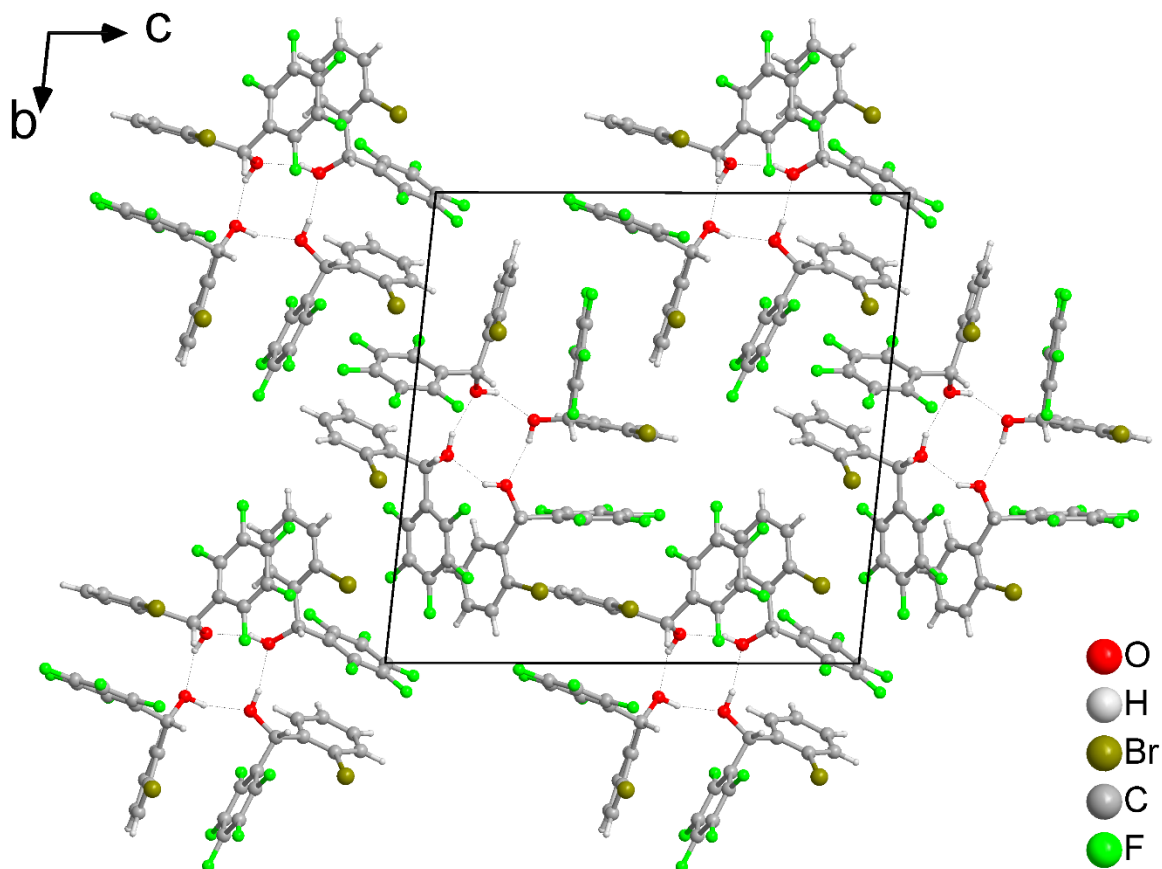

**Figure S3.** One of two symmetry-independent sheets of tetramers of **3f** containing two of four symmetry-independent tetramers. Tetramers within the sheet show alternating chirality.

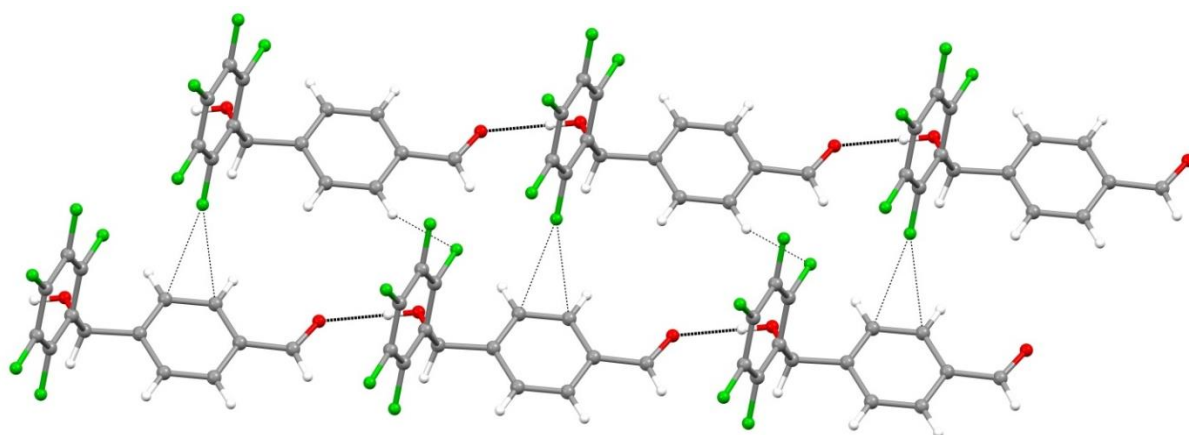

**Figure S4.** One-dimensional hydrogen bonded ( $\text{O-H}\cdots\text{O}$ ) chains also exhibit  $\text{C-F}\cdots\pi(\text{C})$  and  $\text{C-H}\cdots\text{F}$  interactions between phenyl and pentafluorophenyl groups in **3l**.

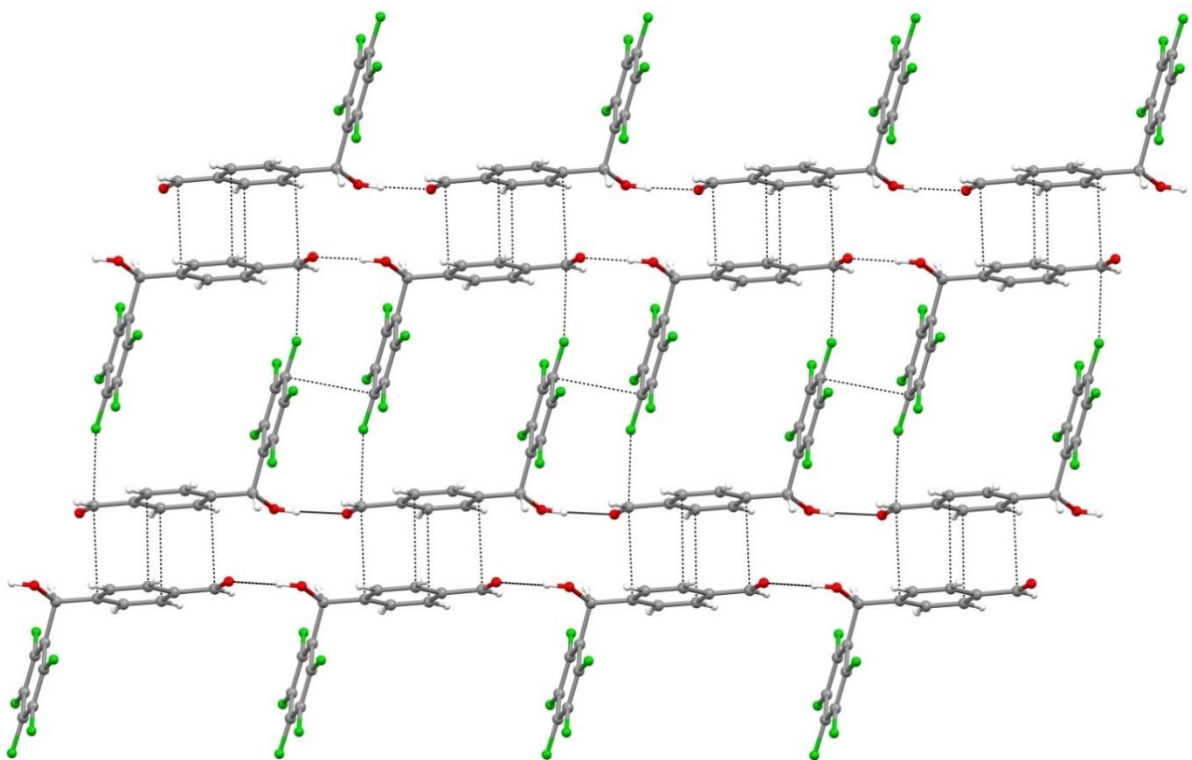

**Figure S5.** The  $\pi$ -stacked hydrogen-bonded chains further interdigitate<sup>8</sup> (viewed approximately along  $a$ -axis) and there exist partial  $\pi \cdots \pi$  interactions between fluorinated moieties and  $C-F \cdots \pi$  interactions between pentafluorophenyl and carbonyl groups in **3I**.



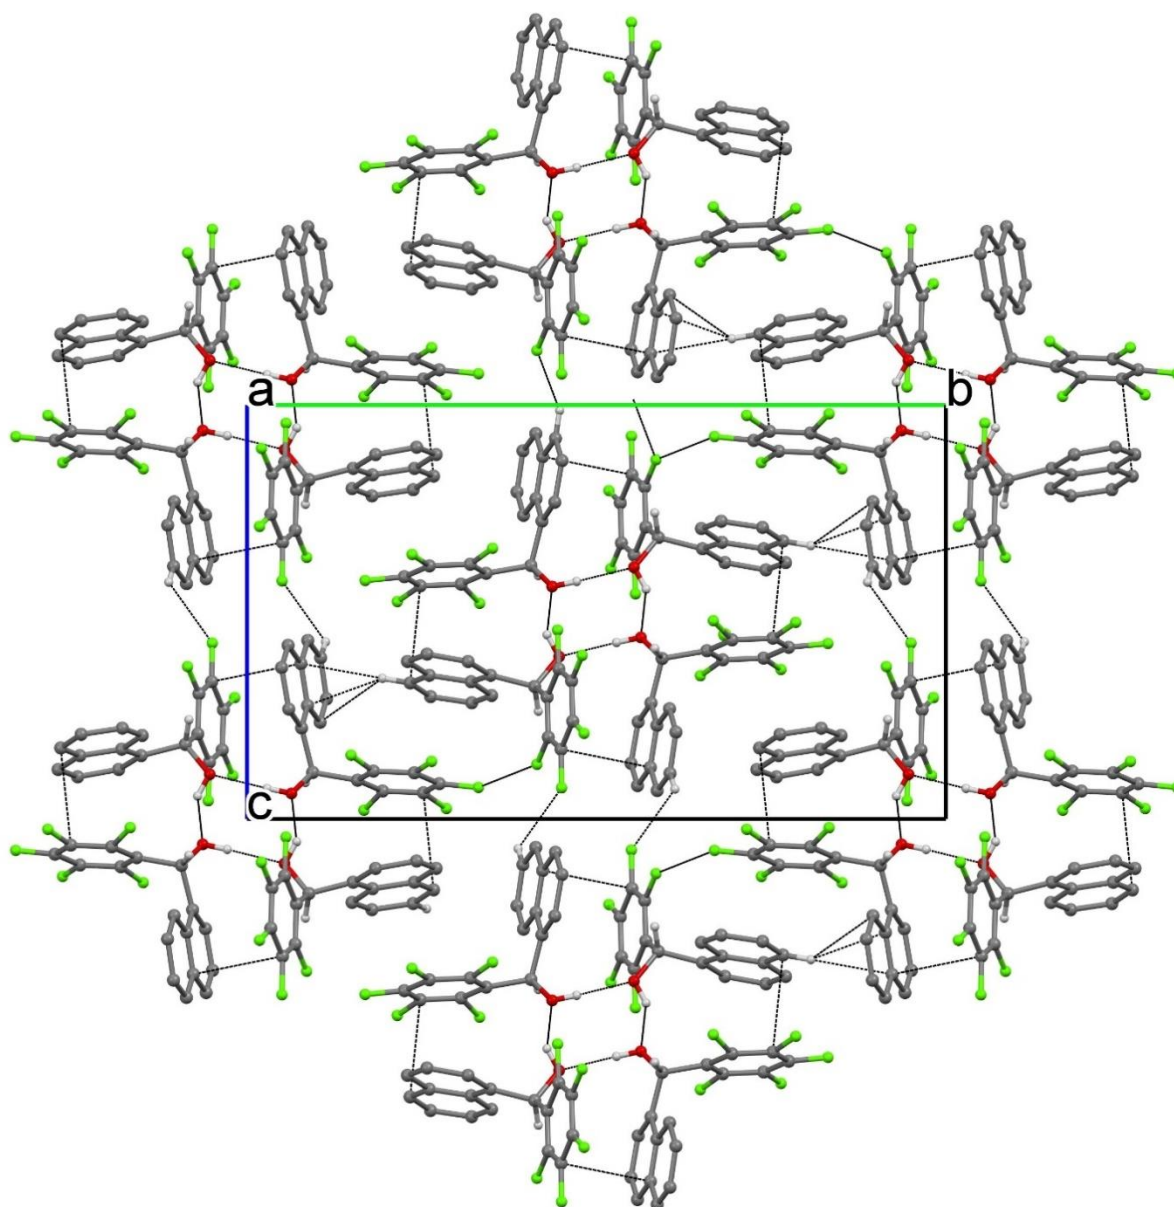

**Figure S6.** The crystal packing of compound **3m** is viewed along the *a*-axis. In addition to O–H···O hydrogen bonding, various intermolecular interactions, such as  $\pi\cdots\pi$ , C–H··· $\pi$ , C–H···F, and F···F, are also observed. Interplanar separations and angles between the planes of naphthalene and pentafluorophenyl rings are 3.416(5) – 3.637(3) Å and 6.47(13) – 16.05(13)°.

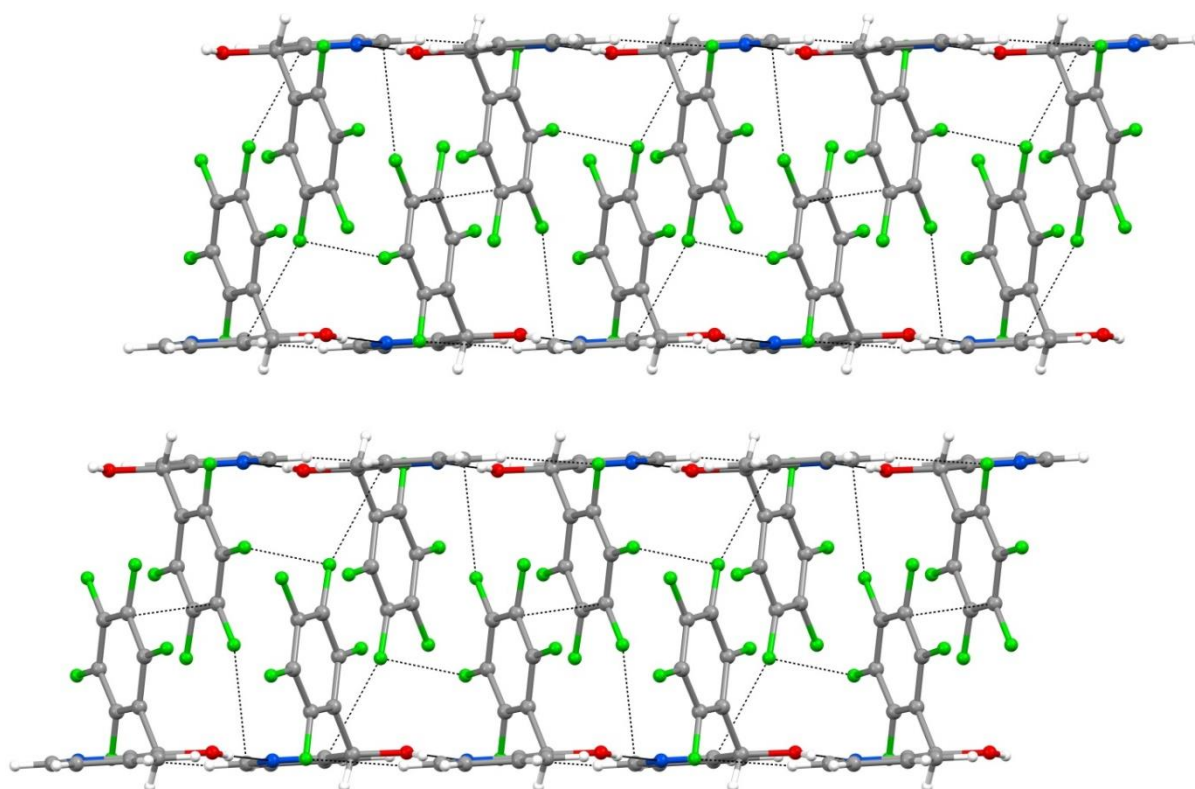

**Figure S7.** The crystal packing of **3n** is viewed along the *b*-axis. The pyridyl rings lie coplanar and the pentafluorophenyl groups interdigitate to form a parallel ribbon-like arrangement. Various types of weak interactions include, besides O–H···N hydrogen bonding, C–H··· $\pi$ , C–F··· $\pi$ , and F···F interactions ( $d_{\text{F-F}} = 2.72 \text{ \AA}$ ,  $F_{\text{vdW-radius}} = 1.47 \text{ \AA}$ ). Alternating hydrophobic and hydrophilic regions can be seen.

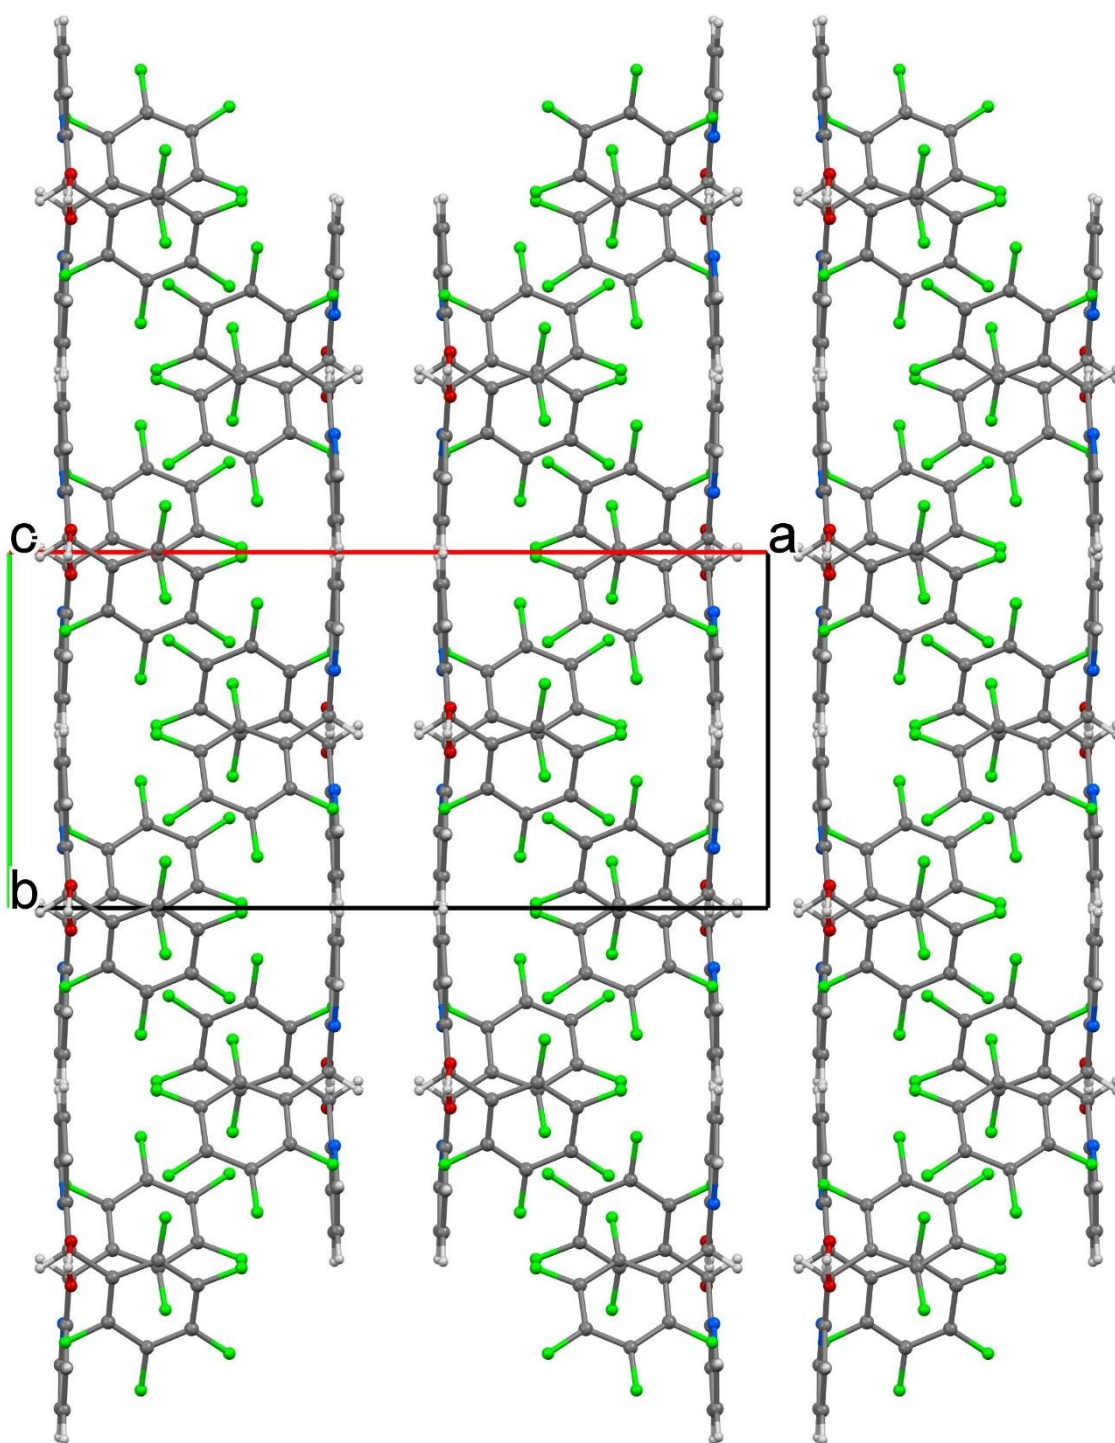

**Figure S8.** The crystal packing of **3n** is viewed along the *c*-axis. Alternating hydrophobic and hydrophilic regions can be seen.

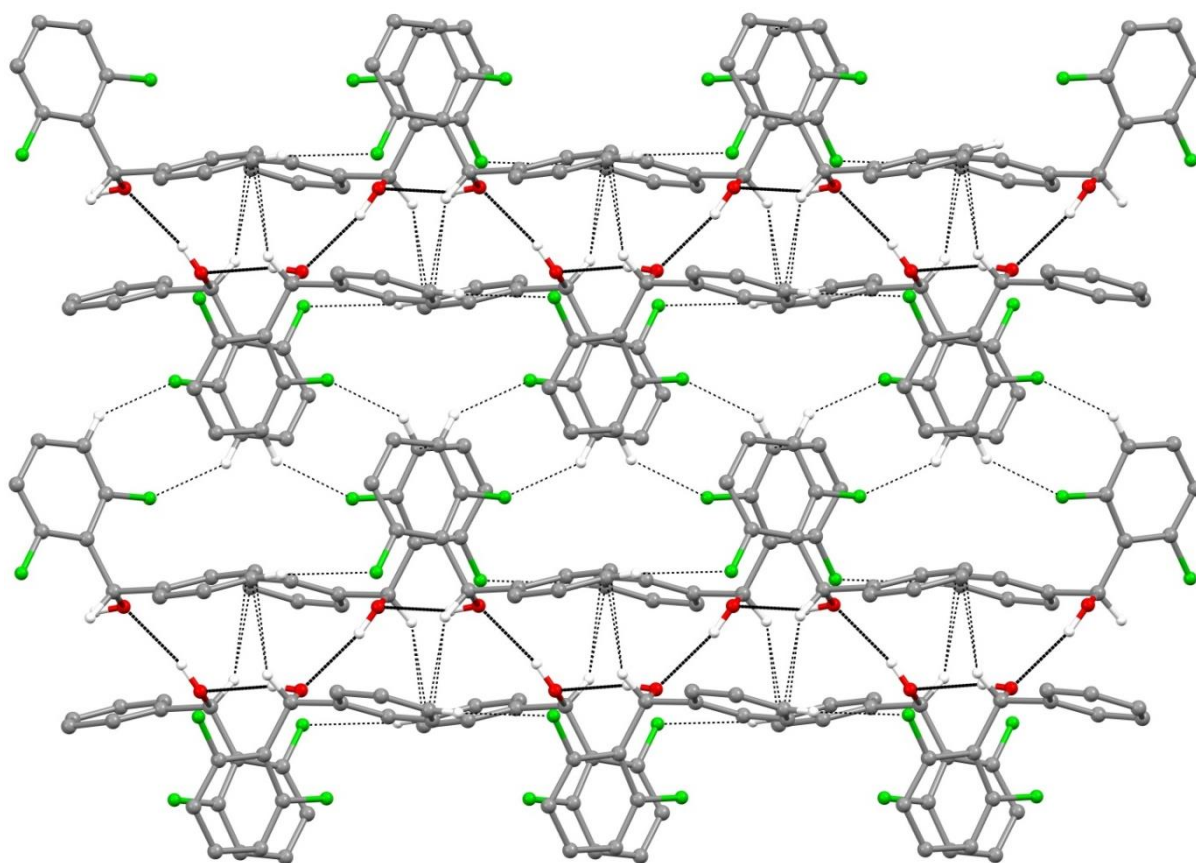

**Figure S9.** Crystal packing of **4d**, viewed along the *a*-axis, shows corrugated one-dimensional hydrogen bonded (O–H···O) chains propagating along the *c*-axis. In addition, several other intermolecular interactions, including C–H···F, C–H··· $\pi$ , and  $\pi$ ··· $\pi$ , can be observed.

**Table S2. Parameters for hydrogen bonding in 3f, 3l, 3m 3n and 4d.**

| Donor(D)–H···Acceptor(A) <sup>a</sup> | H···A (Å) <sup>a</sup> | D···A (Å)           | D–H···A (°) |
|---------------------------------------|------------------------|---------------------|-------------|
| <b>Compound 3f</b>                    |                        |                     |             |
| O1–H1A···O2                           | 1.90                   | 2.693(5)            | 157.4       |
| O2–H2A···O3                           | 1.87                   | 2.702(6)            | 171.0       |
| O3–H3A···O4                           | 1.90                   | 2.704(5)            | 160.2       |
| O4–H4A···O1                           | 1.97                   | 2.765(6)            | 156.5       |
| O5–H5A···O8                           | 1.91                   | 2.697(6)            | 156.2       |
| O8–H8A···O7                           | 1.86                   | 2.681(6)            | 166.6       |
| O7–H7A···O6_1/11                      | 2.02/2.07              | 2.703(14)/2.646(16) | 138.4/125.4 |
| O6_1/11–H6_1/11···O5                  | 1.87/1.84              | 2.700(19)/2.666(11) | 171.0/166.8 |
| O9–H9A···O12                          | 1.95                   | 2.698(6)            | 148.1       |
| O10–H10A···O9                         | 1.97                   | 2.756(5)            | 155.7       |
| O11–H11A···O10                        | 1.95                   | 2.711(6)            | 150.3       |
| O12–H12A···O11                        | 1.92                   | 2.740(5)            | 166.1       |
| O13–H13A···O14                        | 1.88                   | 2.690(5)            | 162.0       |
| O14–H14A···O15                        | 1.90                   | 2.716(5)            | 163.0       |
| O15–H15A···O16                        | 1.89                   | 2.699(6)            | 161.0       |
| O16–H16A···O13                        | 1.88                   | 2.677(6)            | 158.8       |
| <b>Compound 3l</b>                    |                        |                     |             |
| O1–H1···O2                            | 1.90                   | 2.7412(16)          | 176.4       |
| <b>Compound 3m</b>                    |                        |                     |             |
| O1_1–H1a_1···O1a_3                    | 1.99                   | 2.65(2)             | 135.3       |
| O1_1–H1a_1···O1_3                     | 2.11                   | 2.72(2)             | 129.1       |
| O1a_3–H1ab_3···O1_1                   | 1.91                   | 2.65(2)             | 145.6       |
| O1a_3–H1ab_3···O1a_1                  | 1.82                   | 2.41(3)             | 125.4       |
| <b>Compound 3n</b>                    |                        |                     |             |
| O1–H1···N1                            | 1.95                   | 2.7880(17)          | 173.5       |
| <b>Compound 4d</b>                    |                        |                     |             |
| O1–H1A···O1                           | 2.16                   | 2.9815(17)          | 165.4       |
| O1–H1B···O1                           | 2.04                   | 2.8661(16)          | 167.3       |

<sup>a</sup> The donor–H distance was constrained to be 0.84 Å for all H atoms. H atoms were refined riding in idealized positions.

**Table S3. Aryl...aryl ( $\pi\cdots\pi$ ) distances (Å) and angles ( $^\circ$ ) in **3f**, **3l**, and **3m** at 100 K.**

| Aryl...aryl                                | Centroid-centroid distance | Interplanar separation | Offset shift <sup>a</sup> | Plane normal angle |
|--------------------------------------------|----------------------------|------------------------|---------------------------|--------------------|
| <b>Compound 3f</b>                         |                            |                        |                           |                    |
| Ar <sub>Br1</sub> ...Ar <sub>F</sub>       | 3.648(4)                   | 3.529(5)/3.330(7)      | 0.924(11)/1.490(12)       | 9.6(3)             |
| Ar <sub>Br2</sub> ...Ar <sub>F</sub>       | 3.536(4)                   | 3.470(4)/3.284(5)      | 0.682(9) / 1.311(8)       | 11.04(19)          |
| Ar <sub>Br3</sub> ...Ar <sub>F</sub>       | 3.800(4)                   | 3.570(5)/3.348(6)      | 1.301(11)/1.797(9)        | 9.9(2)             |
| Ar <sub>Br4</sub> ...Ar <sub>F</sub>       | 3.648(4)                   | 3.525(5)/3.386(6)      | 0.940(11)/1.357(10)       | 9.5(2)             |
| Ar <sub>Br5</sub> ...Ar <sub>F</sub>       | 3.657(3)                   | 3.538(4)/3.362(5)      | 0.927(9)/1.439(9)         | 8.75(19)           |
| Ar <sub>Br6_1</sub> ...Ar <sub>F</sub>     | 3.694(14)                  | 3.640(14)/3.687(14)    | 0.631(14)/0.23(5)         | 10.7(8)            |
| Ar <sub>Br6_11</sub> ...Ar <sub>F</sub>    | 3.719(15)                  | 3.717(14)/3.682(14)    | 0.12(5)/0.518(15)         | 9.9(8)             |
| Ar <sub>Br7</sub> ...Ar <sub>F</sub>       | 3.783(5)                   | 3.285(8)/3.659(6)      | 1.875(12)/0.959(13)       | 16.8(3)            |
| Ar <sub>Br8</sub> ...Ar <sub>F</sub>       | 3.523(4)                   | 3.416(4)/3.514(4)      | 0.729(10)/0.25(1)         | 8.0(2)             |
| Ar <sub>Br9</sub> ...Ar <sub>F</sub>       | 3.674(5)                   | 3.494(6)/3.276(8)      | 1.138(12)/1.663(12)       | 8.9(3)             |
| Ar <sub>Br10</sub> ...Ar <sub>F</sub>      | 3.719(4)                   | 3.528(5)/3.317(5)      | 1.179(10)/1.682(9)        | 11.43(19)          |
| Ar <sub>Br11</sub> ...Ar <sub>F</sub>      | 3.728(4)                   | 3.554(5)/3.362(5)      | 1.128(10)/1.611(9)        | 8.8(2)             |
| Ar <sub>Br12</sub> ...Ar <sub>F</sub>      | 3.564(4)                   | 3.484(4)/3.343(6)      | 0.754(11)/1.237(10)       | 9.7(2)             |
| Ar <sub>Br13</sub> ...Ar <sub>F</sub>      | 3.739(4)                   | 3.357(6)/3.635(4)      | 1.646(10)/0.877(10)       | 13.3(2)            |
| Ar <sub>Br14</sub> ...Ar <sub>F</sub>      | 3.610(4)                   | 3.593(4)/3.523(4)      | 0.35(1)/0.788(10)         | 12.5(2)            |
| Ar <sub>Br15</sub> ...Ar <sub>F</sub>      | 3.706(5)                   | 3.559(5)/3.281(7)      | 1.034(12)/1.723(11)       | 12.9(3)            |
| Ar <sub>Br16</sub> ...Ar <sub>F</sub>      | 3.592(4)                   | 3.577(4)/3.539(4)      | 0.330(9)/0.614(9)         | 4.96(19)           |
| <b>Compound 3l</b>                         |                            |                        |                           |                    |
| Ar...Ar                                    | 3.6667(10)                 | 3.3379(13)             | 1.5176(19)                | 0.00(7)            |
| Ar <sub>F</sub> ...Ar <sub>F</sub>         | 4.6778(14)                 | 3.375(2)               | 3.238(3)                  | 0.00(1)            |
| <b>Compound 3m</b> <sup>b</sup>            |                            |                        |                           |                    |
| Ar <sub>d</sub> ...Ar <sub>F</sub>         | 3.650(3)                   | 3.637(3)/3.564(3)      | 0.305(7)/0.787(6)         | 16.05(13)          |
| Ar...Ar <sub>F_d</sub>                     | 3.538(3)                   | 3.448(3)/3.357(4)      | 0.794(5)/1.119(7)         | 6.47(13)           |
| Ar <sub>d</sub> ...Ar <sub>F</sub> (T...T) | 3.886(3)                   | 3.613(4)/3.416(5)      | 1.431(5)/1.854(7)         | 6.89(13)           |
| <b>Compound 3n</b>                         |                            |                        |                           |                    |
| Ar <sub>F</sub> ...Ar <sub>F</sub>         | 4.2972(15)                 | 3.193(2)               | 2.876(2)                  | 0.0(5)             |
| <b>Compound 4d</b>                         |                            |                        |                           |                    |
| Ar...Ar                                    | 4.8860(13)                 | 3.177(3)               | 3.712(2)                  | 0.00(1)            |
| Ar <sub>HF</sub> ...Ar <sub>HF</sub>       | 4.5100(14)                 | 3.358(2)               | 3.010(3)                  | 17.65(7)           |

<sup>a</sup> The offset shift, also called inter-centroid shift, is the distance within a plane of an aryl ring between the centroid of the respective aryl ring and the intersection point with the normal to the plane through the centroid of the other aryl ring.

<sup>b</sup> Only interactions with the main parts (85%) of the disordered (d) pentafluorophenyl and naphthalene moieties are reported here.

## VII. Computational Methods

All the calculations were performed with the Gaussian09 programs.<sup>[9]</sup> The geometries of the different structures were optimized at the DFT level using the B3-LYP<sup>[10-11]</sup> hybrid functional with 6-31+G(d) basis set. Frequency analysis was carried out at the same level to verify the stationary points as an intermediate or transition state and to obtain the thermodynamic energy corrections assuming a standard state of 1 atm and 298.15 K. Intrinsic reaction coordinates (IRC)<sup>[12]</sup> were calculated to confirm the connection between the transition state and the correct reactant/product. The solvent effects were taken into consideration by single point calculations of the gas-phase stationary points with the SMD<sup>[13-15]</sup> continuum solvation model. To obtain more accurate energy information, single-point calculations were carried out with the M06<sup>[16]</sup> functional and 6-311++G(d,p) basis set in toluene solvent (using the SMD solvent model). All of the three-dimensional molecular diagrams of the molecules were generated with CYLView.<sup>[17]</sup>



**Table S4. Absolute calculated electronic energies, correction of enthalpies, and free energies.**

| Geometry     | $E_{(\text{elec-B3LYP})}^1$ | $G_{(\text{corr-B3LYP})}^2$ | $H_{(\text{corr-B3LYP})}^3$ | $E_{(\text{M06 toluene})}^4$ | IF <sup>5</sup> |
|--------------|-----------------------------|-----------------------------|-----------------------------|------------------------------|-----------------|
| <b>6</b>     | -2602.91354                 | 0.19189                     | 0.276362                    | -2602.613003                 |                 |
| <b>7-ts</b>  | -2602.862623                | 0.187452                    | 0.27543                     | -2602.566437                 | -135.94         |
| <b>8</b>     | -2602.899113                | 0.183295                    | 0.276536                    | -2602.586769                 |                 |
| <b>9</b>     | -2948.493833                | 0.283666                    | 0.395715                    | -2948.028436                 |                 |
| <b>10-ts</b> | -2948.48623                 | 0.2872                      | 0.395038                    | -2948.022579                 | -104.87         |
| <b>11</b>    | -2948.514631                | 0.289305                    | 0.397303                    | -2948.048797                 |                 |
| <b>12-ts</b> | -2948.483194                | 0.291873                    | 0.396411                    | -2948.029586                 | -71.99          |
| <b>13</b>    | -2948.526205                | 0.29542                     | 0.397854                    | -2948.072049                 |                 |
| <b>14-ts</b> | -4087.664887                | 0.503267                    | 0.650296                    | -4086.926819                 | -74.41          |
| <b>15</b>    | -4087.674391                | 0.503786                    | 0.651069                    | -4086.934931                 |                 |
| <b>16-ts</b> | -4087.667933                | 0.502938                    | 0.650055                    | -4086.930499                 | -106.81         |
| <b>17</b>    | -1484.742692                | 0.286987                    | 0.373107                    | -1484.297391                 |                 |
| <b>18</b>    | -2503.68739                 | 0.201261                    | 0.283462                    | -2503.387159                 |                 |
| <b>19-ts</b> | -2503.634465                | 0.196446                    | 0.282443                    | -2503.338675                 | -135.57         |
| <b>20</b>    | -2404.458457                | 0.210645                    | 0.290577                    | -2404.158042                 |                 |
| <b>21-ts</b> | -2404.40159                 | 0.205886                    | 0.289656                    | -2404.105012                 | -137.3          |
| <b>22</b>    | -2305.218418                | 0.220156                    | 0.297974                    | -2304.918703                 |                 |
| <b>23-ts</b> | -2305.159478                | 0.215332                    | 0.297033                    | -2304.863907                 | -141.31         |
| <b>24</b>    | -2205.970598                | 0.228529                    | 0.305459                    | -2205.671805                 |                 |
| <b>25-ts</b> | -2205.908151                | 0.223326                    | 0.304145                    | -2205.612351                 | -104.72         |
| <b>26</b>    | -2205.963365                | 0.228374                    | 0.305711                    | -2205.664144                 |                 |
| <b>27-ts</b> | -2205.892339                | 0.222338                    | 0.304343                    | -2205.595884                 | -114.48         |
| <b>28</b>    | -1402.96216                 | 0.191335                    | 0.268364                    | -1402.767999                 |                 |
| <b>29-ts</b> | -1402.951039                | 0.18894                     | 0.266972                    | -1402.754229                 | -132.93         |
| <b>30</b>    | -675.200515                 | 0.156661                    | 0.211906                    | -675.04524                   |                 |



|              |              |          |          |              |         |
|--------------|--------------|----------|----------|--------------|---------|
| <b>31</b>    | -727.84762   | 0.011433 | 0.055189 | -727.754167  |         |
| <b>32-ts</b> | -1073.433312 | 0.110004 | 0.173384 | -1073.176777 | -121.88 |
| <b>33</b>    | -1073.441942 | 0.113864 | 0.175008 | -1073.188879 |         |
| <b>34-ts</b> | -1748.560884 | 0.292987 | 0.387263 | -1748.200815 | -108.2  |
| <b>35</b>    | -1748.578555 | 0.295372 | 0.389196 | -1748.223167 |         |

<sup>1</sup> The electronic energy calculated by B3-LYP/6-31+g(d) in gas phase. <sup>2</sup> The thermal correction to Gibbs free energy calculated by B3-LYP/6-31+g(d) in gas phase. <sup>3</sup> The thermal correction to enthalpy calculated by B3-LYP/6-31+g(d) in gas phase. <sup>4</sup> The electronic energy calculated by M06/6-311++G(d,p) in toluene. <sup>5</sup> The B3-LYP calculated imaginary frequencies for the transition states.

### B3LYP geometries for all the optimized compounds and transition state.

#### 6

|   |             |             |             |
|---|-------------|-------------|-------------|
| C | -2.27197500 | 0.88043600  | -1.53236400 |
| C | -2.65585600 | -0.62458300 | -1.26977200 |
| O | -1.50658800 | -1.11901800 | -0.57012800 |
| O | -1.52181800 | 1.20667900  | -0.35807100 |
| B | -0.82930300 | -0.00536400 | 0.14312500  |
| C | 0.81156600  | -0.00311700 | -0.20654500 |
| C | 1.57578400  | 1.16182700  | -0.26982500 |
| C | 1.54782400  | -1.16102800 | -0.45624800 |
| C | 2.93231300  | 1.20292500  | -0.58179700 |
| C | 2.90348000  | -1.18470400 | -0.77289900 |
| C | 3.60583200  | 0.01408700  | -0.84209000 |
| O | -1.03623900 | -0.09693500 | 1.60633000  |
| C | -0.02050700 | -0.16995300 | 2.61978200  |
| O | 0.33486200  | -1.32923400 | 2.92791100  |
| O | 0.33160600  | 0.93346200  | 3.09209100  |
| C | -3.88967900 | -0.76451400 | -0.35566100 |
| H | -4.81443900 | -0.45330500 | -0.85606700 |
| H | -4.00876800 | -1.81920100 | -0.07493400 |
| H | -3.76934400 | -0.18045300 | 0.56199600  |
| C | -2.86422200 | -1.46237000 | -2.53519300 |
| H | -3.13209500 | -2.49061300 | -2.26257100 |
| H | -3.67923300 | -1.05863100 | -3.14923800 |
| H | -1.95640700 | -1.50483400 | -3.14221000 |
| C | -3.46281000 | 1.83876300  | -1.63913700 |
| H | -3.10237700 | 2.85735100  | -1.82798000 |
| H | -4.12221100 | 1.56149300  | -2.47087500 |
| H | -4.05557800 | 1.85240900  | -0.71940700 |
| C | -1.37274000 | 1.05628800  | -2.77092000 |
| H | -1.92916100 | 0.90706000  | -3.70377100 |

|             |             |             |             |
|-------------|-------------|-------------|-------------|
| H           | -0.96944700 | 2.07510200  | -2.77334300 |
| H           | -0.52928100 | 0.35996600  | -2.75615700 |
| F           | 1.00950400  | 2.37975900  | -0.00637500 |
| F           | 3.59563500  | 2.37278600  | -0.63053400 |
| F           | 4.91280700  | 0.02264500  | -1.14748600 |
| F           | 3.53950500  | -2.34771000 | -1.00564700 |
| F           | 0.95227900  | -2.39118300 | -0.38382100 |
| K           | -1.04721800 | -2.87445200 | 1.41987500  |
| K           | -1.04337900 | 2.67075900  | 1.79668500  |
| <b>7-ts</b> |             |             |             |
| C           | 0.46292300  | 2.80457500  | -0.28914600 |
| C           | 0.93411000  | 2.36303100  | 1.16428300  |
| O           | 0.87683100  | 0.91600700  | 1.09949800  |
| O           | 0.74813000  | 1.63109200  | -1.08854900 |
| B           | 0.85999100  | 0.54819300  | -0.24076000 |
| C           | -1.31576800 | -0.51892500 | -0.33293200 |
| C           | -2.26133100 | -0.08870200 | -1.25197100 |
| C           | -1.86771100 | -1.09607000 | 0.79104800  |
| C           | -3.64089400 | -0.16870500 | -1.05798600 |
| C           | -3.22770800 | -1.21845600 | 1.06731000  |
| C           | -4.12723600 | -0.73266400 | 0.12163900  |
| O           | 1.51143300  | -0.64889100 | -0.66281000 |
| C           | 2.83025300  | -0.92611000 | -0.45547200 |
| O           | 3.66663800  | -0.00183500 | -0.32608100 |
| O           | 3.09202800  | -2.18298700 | -0.43336200 |
| C           | 2.39361100  | 2.73219200  | 1.47641400  |
| H           | 2.52668100  | 3.81639300  | 1.57357700  |
| H           | 2.67368000  | 2.26678300  | 2.42853100  |
| H           | 3.07010100  | 2.35019600  | 0.70696100  |
| C           | 0.03030000  | 2.83613500  | 2.30474800  |
| H           | 0.41221200  | 2.44826600  | 3.25580400  |
| H           | 0.01638800  | 3.93156600  | 2.36603700  |
| H           | -0.99545900 | 2.47979900  | 2.18548300  |
| C           | 1.24801100  | 3.97521600  | -0.88729600 |
| H           | 0.87359700  | 4.18332900  | -1.89564900 |
| H           | 1.12174100  | 4.88282900  | -0.28394900 |
| H           | 2.31424600  | 3.74801700  | -0.96396200 |
| C           | -1.04009200 | 3.10287600  | -0.38850800 |
| H           | -1.29525600 | 4.03636500  | 0.12697000  |
| H           | -1.31041400 | 3.20420500  | -1.44443900 |
| H           | -1.64393300 | 2.29651200  | 0.03300100  |
| F           | -1.86829200 | 0.45997600  | -2.44177900 |
| F           | -4.52419900 | 0.27623100  | -1.98186400 |
| F           | -5.45583100 | -0.82835800 | 0.33350600  |
| F           | -3.69504800 | -1.80380000 | 2.19687600  |

|          |             |             |             |
|----------|-------------|-------------|-------------|
| F        | -1.01943300 | -1.67657400 | 1.74561600  |
| K        | 5.61649200  | -1.62245000 | -0.19876500 |
| K        | 0.45353000  | -2.92102000 | -0.21376700 |
| <b>8</b> |             |             |             |
| C        | 5.27663600  | 1.00011600  | -0.46195400 |
| C        | 5.40606700  | -0.48068100 | 0.08284100  |
| O        | 4.12362500  | -0.67871900 | 0.74640200  |
| O        | 3.83438000  | 1.14029100  | -0.63301200 |
| B        | 3.24118600  | 0.20198900  | 0.18236900  |
| C        | -3.10863500 | 1.35634300  | -0.42346400 |
| C        | -4.37302000 | 1.75597400  | -0.03626100 |
| C        | -3.02269700 | 0.02479900  | -0.71918100 |
| C        | -5.47480000 | 0.90413400  | 0.06419200  |
| C        | -4.04871500 | -0.90520200 | -0.61153400 |
| C        | -5.30537500 | -0.45243300 | -0.22182000 |
| O        | 1.89177800  | 0.27594500  | 0.43221300  |
| C        | 1.06562400  | -0.83599600 | 0.76323300  |
| O        | 1.37994000  | -1.95077400 | 0.31481000  |
| O        | 0.03991600  | -0.49648300 | 1.40842900  |
| C        | 5.49761700  | -1.53551300 | -1.02858300 |
| H        | 6.46620600  | -1.49763500 | -1.53953600 |
| H        | 5.37924300  | -2.52811800 | -0.58281300 |
| H        | 4.70507100  | -1.40857800 | -1.77337500 |
| C        | 6.51783300  | -0.69971100 | 1.10688100  |
| H        | 6.50898800  | -1.74351300 | 1.43793600  |
| H        | 7.50013300  | -0.49181600 | 0.66590700  |
| H        | 6.38874600  | -0.06699400 | 1.98856800  |
| C        | 5.95120700  | 1.25762500  | -1.80756200 |
| H        | 5.77862700  | 2.29543300  | -2.11263500 |
| H        | 7.03429900  | 1.10170600  | -1.73613400 |
| H        | 5.55559600  | 0.60653200  | -2.59064200 |
| C        | 5.70937700  | 2.06356700  | 0.55700400  |
| H        | 6.79481400  | 2.06027400  | 0.70533400  |
| H        | 5.41738500  | 3.05163200  | 0.18562200  |
| H        | 5.22789800  | 1.91042000  | 1.52872800  |
| F        | -4.60299700 | 3.06369700  | 0.31317600  |
| F        | -6.69539600 | 1.34037300  | 0.44678400  |
| F        | -6.33777700 | -1.31272000 | -0.11097600 |
| F        | -3.84415100 | -2.24808800 | -0.83563000 |
| F        | -1.78009700 | -0.51937500 | -1.13495500 |
| K        | -1.19472100 | -2.64939000 | 0.40126200  |
| K        | -0.40122600 | 1.89915500  | 0.28674400  |
| <b>9</b> |             |             |             |
| C        | -4.83159700 | 0.03947600  | 0.36536300  |
| C        | -3.49213300 | 0.24315000  | 0.68414400  |

|   |             |             |             |
|---|-------------|-------------|-------------|
| C | -2.43332400 | -0.53403600 | 0.27153600  |
| C | -2.82305300 | -1.58400600 | -0.52603000 |
| C | -4.12916000 | -1.88013400 | -0.90604300 |
| C | -5.15007300 | -1.04698000 | -0.44920900 |
| C | -0.37872300 | 0.88334000  | -1.84999700 |
| H | -1.27348100 | 0.58003400  | -2.42326600 |
| C | -0.44116900 | 2.23293200  | -1.25529700 |
| C | 0.62058800  | 2.74491200  | -0.48514200 |
| C | -1.59250300 | 3.00967300  | -1.46242400 |
| C | 0.51966500  | 4.01975600  | 0.06988800  |
| H | 1.51168400  | 2.14438100  | -0.32993100 |
| C | -1.68897500 | 4.28654800  | -0.90766900 |
| H | -2.41496600 | 2.60399800  | -2.04707200 |
| C | -0.63356800 | 4.79065300  | -0.14099000 |
| H | 1.34062500  | 4.41833400  | 0.66043400  |
| H | -2.58369000 | 4.88211100  | -1.06469900 |
| H | -0.70650500 | 5.78474200  | 0.29266300  |
| F | -1.85890200 | -2.46842500 | -1.03805700 |
| F | -4.43643200 | -2.93252400 | -1.69759100 |
| F | -6.43029900 | -1.28964000 | -0.79055800 |
| F | -5.81969700 | 0.84875200  | 0.80924500  |
| F | -3.24472100 | 1.35183000  | 1.51118600  |
| O | 0.57984300  | 0.12177200  | -1.76178100 |
| O | 3.65752800  | 0.84274600  | 0.57060500  |
| C | 4.62415000  | 0.58634500  | -0.48781100 |
| C | 4.65022600  | -0.99420000 | -0.54638300 |
| O | 3.32079500  | -1.34269300 | -0.05939500 |
| B | 2.87710000  | -0.28772200 | 0.72954200  |
| C | 4.08528000  | 1.23626000  | -1.76957700 |
| H | 3.94488600  | 2.30785800  | -1.59133100 |
| H | 4.78897400  | 1.12321300  | -2.60195000 |
| H | 3.12057900  | 0.81270200  | -2.06457400 |
| C | 5.95184100  | 1.23396700  | -0.09535100 |
| H | 5.83277500  | 2.32221900  | -0.06045200 |
| H | 6.29170000  | 0.90220100  | 0.88859700  |
| H | 6.73099800  | 1.00304200  | -0.83178500 |
| C | 5.65526100  | -1.62696700 | 0.42654800  |
| H | 5.47767500  | -2.70628700 | 0.46994000  |
| H | 6.68824300  | -1.45871100 | 0.10277300  |
| H | 5.54061200  | -1.22988100 | 1.44038800  |
| C | 4.83004000  | -1.58777200 | -1.94256100 |
| H | 5.79602600  | -1.29241200 | -2.36837800 |
| H | 4.81309300  | -2.68189100 | -1.88306500 |
| H | 4.04022100  | -1.26755500 | -2.62751400 |
| C | 1.30141900  | -1.49565800 | 2.38753300  |

|              |             |             |             |
|--------------|-------------|-------------|-------------|
| O            | 1.53720200  | -2.59471600 | 1.88829000  |
| O            | 0.70973000  | -1.07937200 | 3.38076300  |
| O            | 1.78250000  | -0.29397100 | 1.53411200  |
| K            | 0.76793500  | -2.38861300 | -0.62091400 |
| K            | -0.65111500 | 0.86371200  | 2.22826100  |
| <b>10-ts</b> |             |             |             |
| C            | -4.54637200 | -0.41225900 | 0.76349200  |
| C            | -3.33810500 | 0.25411600  | 0.57317800  |
| C            | -2.37179400 | -0.11990500 | -0.33549000 |
| C            | -2.67609700 | -1.25320400 | -1.05445500 |
| C            | -3.85607600 | -1.98087500 | -0.93371900 |
| C            | -4.80613100 | -1.54372100 | -0.01036800 |
| C            | -0.58362500 | 1.06853900  | -1.27705500 |
| H            | -1.03388200 | 0.68935200  | -2.20450900 |
| C            | -0.97613300 | 2.47374700  | -0.94180800 |
| C            | -0.12585800 | 3.27618800  | -0.16589300 |
| C            | -2.15157600 | 3.03132400  | -1.46687100 |
| C            | -0.46165700 | 4.60508900  | 0.10757200  |
| H            | 0.81990900  | 2.86415100  | 0.17869300  |
| C            | -2.48809300 | 4.35632200  | -1.19500200 |
| H            | -2.81087600 | 2.41333700  | -2.07218700 |
| C            | -1.64721400 | 5.14533100  | -0.39992900 |
| H            | 0.20746000  | 5.22231000  | 0.70212400  |
| H            | -3.40627000 | 4.77581800  | -1.59775900 |
| H            | -1.91059400 | 6.17819900  | -0.18761800 |
| F            | -1.75561900 | -1.74898500 | -1.98136500 |
| F            | -4.10047400 | -3.08522100 | -1.66895500 |
| F            | -5.95916200 | -2.21708500 | 0.14230800  |
| F            | -5.45672000 | -0.00721700 | 1.67205100  |
| F            | -3.10710800 | 1.34515100  | 1.40033900  |
| O            | 0.47453200  | 0.55807700  | -0.83552700 |
| O            | 4.02001300  | 0.37935600  | 1.33521400  |
| C            | 4.84093600  | 0.64420500  | 0.16679500  |
| C            | 4.67583600  | -0.68770000 | -0.66440800 |
| O            | 3.34898100  | -1.13929700 | -0.25567200 |
| B            | 3.09113500  | -0.58237300 | 0.99253600  |
| C            | 4.24355600  | 1.87427700  | -0.53299100 |
| H            | 4.22527000  | 2.70725400  | 0.17799800  |
| H            | 4.84292700  | 2.17960700  | -1.39819300 |
| H            | 3.21687900  | 1.68841700  | -0.86576800 |
| C            | 6.26656500  | 0.94184900  | 0.62838100  |
| H            | 6.27687000  | 1.87010400  | 1.20943800  |
| H            | 6.66248900  | 0.14491400  | 1.26248800  |
| H            | 6.93545600  | 1.07288600  | -0.23090000 |
| C            | 5.66487900  | -1.78797200 | -0.25705100 |

|           |             |             |             |
|-----------|-------------|-------------|-------------|
| H         | 5.36450100  | -2.73152700 | -0.72454600 |
| H         | 6.68418900  | -1.55188500 | -0.58188700 |
| H         | 5.67182100  | -1.94027800 | 0.82686000  |
| C         | 4.68288500  | -0.50636700 | -2.18128300 |
| H         | 5.63773800  | -0.08548700 | -2.51738800 |
| H         | 4.56110900  | -1.47872500 | -2.67344500 |
| H         | 3.87881300  | 0.15521800  | -2.51497800 |
| C         | 1.15081400  | -2.02615600 | 1.78849700  |
| O         | 1.51918500  | -2.95555800 | 1.05640000  |
| O         | 0.15020500  | -1.84525800 | 2.49447100  |
| O         | 2.03232600  | -0.83270200 | 1.80841200  |
| K         | 0.95562400  | -2.07751000 | -1.33046900 |
| K         | -0.38773600 | 0.64195700  | 1.94486700  |
| <b>11</b> |             |             |             |
| C         | -4.57005300 | -0.52949400 | 0.97168100  |
| C         | -3.34564900 | 0.06554300  | 0.68935500  |
| C         | -2.79054200 | 0.11619700  | -0.59074600 |
| C         | -3.55133400 | -0.48849100 | -1.59300200 |
| C         | -4.78212100 | -1.10006400 | -1.35250300 |
| C         | -5.29673900 | -1.12143900 | -0.06020900 |
| C         | -1.36341900 | 0.66500100  | -0.86330400 |
| H         | -1.27959800 | 0.67893000  | -1.96956100 |
| C         | -1.24796900 | 2.15370800  | -0.45533700 |
| C         | -0.01404700 | 2.63591400  | 0.00206400  |
| C         | -2.30409900 | 3.06609200  | -0.59744200 |
| C         | 0.15914700  | 3.98645400  | 0.32670200  |
| H         | 0.81757500  | 1.93902800  | 0.06898300  |
| C         | -2.13892400 | 4.41514400  | -0.27074800 |
| H         | -3.26997500 | 2.72357800  | -0.96319000 |
| C         | -0.90635900 | 4.88176200  | 0.19792500  |
| H         | 1.12803600  | 4.33987400  | 0.67338000  |
| H         | -2.97477900 | 5.10218600  | -0.38060700 |
| H         | -0.77771800 | 5.93057600  | 0.45311300  |
| F         | -3.10373500 | -0.50559700 | -2.87133500 |
| F         | -5.47150300 | -1.66845300 | -2.35561200 |
| F         | -6.47669500 | -1.70542800 | 0.19250400  |
| F         | -5.05539500 | -0.54118400 | 2.22434400  |
| F         | -2.68220500 | 0.61538900  | 1.74379100  |
| O         | -0.42919200 | -0.15664300 | -0.28967200 |
| O         | 4.51886000  | 0.22993500  | 1.08804600  |
| C         | 5.12505300  | 0.67400700  | -0.15479700 |
| C         | 4.69150900  | -0.46229300 | -1.16321400 |
| O         | 3.43319400  | -0.91895200 | -0.57925000 |
| B         | 3.47349000  | -0.61306600 | 0.77892900  |
| C         | 4.51917800  | 2.04516900  | -0.48788100 |

|              |            |             |             |
|--------------|------------|-------------|-------------|
| H            | 4.69708500 | 2.72309500  | 0.35333700  |
| H            | 4.97485900 | 2.48307400  | -1.38293400 |
| H            | 3.43759300 | 1.98093000  | -0.64836300 |
| C            | 6.63216400 | 0.80570000  | 0.05854100  |
| H            | 6.83003200 | 1.59927800  | 0.78682400  |
| H            | 7.06894500 | -0.11885000 | 0.44345700  |
| H            | 7.13784300 | 1.07128700  | -0.87775000 |
| C            | 5.64386300 | -1.66566500 | -1.17006300 |
| H            | 5.18743100 | -2.48338700 | -1.73767200 |
| H            | 6.60130500 | -1.41513000 | -1.63968800 |
| H            | 5.83738900 | -2.03203100 | -0.15707100 |
| C            | 4.42473400 | 0.00799000  | -2.59197700 |
| H            | 5.33166200 | 0.43590500  | -3.03496200 |
| H            | 4.12547000 | -0.84331500 | -3.21490000 |
| H            | 3.63221200 | 0.75975800  | -2.63348300 |
| C            | 1.84176600 | -2.28350400 | 1.77295800  |
| O            | 2.19402500 | -3.11587800 | 0.92493500  |
| O            | 0.97067400 | -2.27405100 | 2.65026200  |
| O            | 2.56076600 | -0.97988100 | 1.71918700  |
| K            | 0.99258900 | -2.07938200 | -1.18248800 |
| K            | 0.00159100 | 0.12966500  | 2.31128400  |
| <b>12-ts</b> |            |             |             |
| C            | 1.89045500 | 2.92142600  | -0.25955200 |
| C            | 2.13961800 | 2.72834400  | 1.29886300  |
| O            | 2.23954700 | 1.61858200  | -0.79508900 |
| O            | 2.00559600 | 1.29308700  | 1.47715200  |
| B            | 2.14545000 | 0.71290600  | 0.23655800  |
| O            | 2.52961100 | -0.62853100 | 0.06541200  |
| C            | 3.63837400 | -1.04055900 | -0.62428700 |
| O            | 4.68272500 | -0.34817200 | -0.59777600 |
| O            | 3.49295300 | -2.16249400 | -1.22074000 |
| C            | 3.56846900 | 3.08554500  | 1.73776300  |
| H            | 3.75494900 | 4.16447600  | 1.68188900  |
| H            | 3.70549900 | 2.76704900  | 2.77693800  |
| H            | 4.31273800 | 2.56528100  | 1.12630100  |
| C            | 1.12625000 | 3.43028200  | 2.20249300  |
| H            | 1.35322500 | 3.20298200  | 3.25006100  |
| H            | 1.17374400 | 4.51879400  | 2.07318000  |
| H            | 0.10520500 | 3.09903500  | 1.99908700  |
| C            | 2.78935300 | 3.96647100  | -0.92377800 |
| H            | 2.56979300 | 4.00469000  | -1.99667800 |
| H            | 2.60450300 | 4.96380200  | -0.50576700 |
| H            | 3.84893800 | 3.72641200  | -0.80426400 |
| C            | 0.42454900 | 3.18806200  | -0.62443900 |
| H            | 0.08546800 | 4.16240400  | -0.25446700 |

|           |             |             |             |
|-----------|-------------|-------------|-------------|
| H         | 0.32872600  | 3.18254800  | -1.71613100 |
| H         | -0.22022400 | 2.39872600  | -0.23396500 |
| C         | -3.89777800 | -0.83607500 | -1.79066000 |
| C         | -2.82175400 | -0.93308100 | -0.91654600 |
| C         | -2.47539500 | 0.06991900  | -0.00799300 |
| C         | -3.30320200 | 1.19337000  | -0.01905400 |
| C         | -4.39051400 | 1.33159000  | -0.88340400 |
| C         | -4.69060000 | 0.31027100  | -1.77783500 |
| C         | -1.17276300 | -0.00880700 | 0.83901700  |
| H         | -1.15257800 | 0.93312300  | 1.42669800  |
| C         | -1.27863000 | -1.13186400 | 1.90456200  |
| C         | -0.09042300 | -1.70315000 | 2.38673100  |
| C         | -2.49301100 | -1.56927700 | 2.45365200  |
| C         | -0.11709200 | -2.69171100 | 3.37614200  |
| H         | 0.85545600  | -1.33823800 | 1.99749900  |
| C         | -2.52515200 | -2.56273300 | 3.43844600  |
| H         | -3.43007100 | -1.13537200 | 2.11119500  |
| C         | -1.33602200 | -3.13279900 | 3.90204800  |
| H         | 0.81773300  | -3.10976400 | 3.74478500  |
| H         | -3.48067000 | -2.89077400 | 3.84215700  |
| H         | -1.35862800 | -3.90364800 | 4.66881200  |
| F         | -3.07300800 | 2.21828600  | 0.83327800  |
| F         | -5.15160000 | 2.44025900  | -0.85716800 |
| F         | -5.73234900 | 0.42278200  | -2.61893400 |
| F         | -4.18317800 | -1.83734300 | -2.64592600 |
| F         | -2.09523100 | -2.08456200 | -0.98485100 |
| O         | -0.10308700 | -0.11906800 | 0.00354600  |
| K         | 0.72419900  | -2.32606400 | -0.88250400 |
| K         | 5.95106900  | -2.00180100 | -2.04595700 |
| <b>13</b> |             |             |             |
| C         | -2.77645200 | -1.03077300 | -1.83590800 |
| C         | -2.02983700 | -2.19903700 | -1.08119300 |
| O         | -2.68870200 | 0.04941800  | -0.89683100 |
| O         | -1.01744600 | -1.50285700 | -0.35248700 |
| B         | -1.49844500 | -0.14750500 | -0.04837100 |
| O         | -1.76316200 | -0.10227800 | 1.40337600  |
| C         | -2.23819300 | 0.93610300  | 2.21767200  |
| O         | -2.21538600 | 0.63768700  | 3.44165100  |
| O         | -2.60966000 | 2.00371800  | 1.67569200  |
| C         | -2.95040000 | -2.92977900 | -0.08045500 |
| H         | -3.71029600 | -3.54198100 | -0.58090100 |
| H         | -2.33422300 | -3.60262100 | 0.53090400  |
| H         | -3.45450000 | -2.21857800 | 0.58143200  |
| C         | -1.36323300 | -3.23042400 | -1.99724400 |
| H         | -0.87672000 | -4.00348100 | -1.39032100 |



|              |             |             |             |
|--------------|-------------|-------------|-------------|
| H            | -2.09767100 | -3.72590000 | -2.64519800 |
| H            | -0.59764300 | -2.76808700 | -2.62553900 |
| C            | -4.25396400 | -1.30244300 | -2.13722800 |
| H            | -4.68806900 | -0.44910400 | -2.67307400 |
| H            | -4.37429700 | -2.18898900 | -2.77272800 |
| H            | -4.82945800 | -1.44716700 | -1.21913800 |
| C            | -2.05675700 | -0.61884800 | -3.13490100 |
| H            | -2.14281200 | -1.38527600 | -3.91441300 |
| H            | -2.51774300 | 0.29932500  | -3.52199600 |
| H            | -0.99727700 | -0.41752000 | -2.95255100 |
| C            | 3.08564400  | -1.37432200 | -1.37021600 |
| C            | 2.21427100  | -0.30935900 | -1.15622300 |
| C            | 1.66113500  | -0.02602600 | 0.09672300  |
| C            | 2.03336800  | -0.89119800 | 1.12326600  |
| C            | 2.89704700  | -1.96778400 | 0.94724200  |
| C            | 3.43191000  | -2.21193300 | -0.31234400 |
| C            | 0.63845300  | 1.10578600  | 0.33083000  |
| H            | 0.38521600  | 1.07042200  | 1.39600100  |
| C            | 1.24214500  | 2.48616900  | 0.06825400  |
| C            | 1.08385400  | 3.13974800  | -1.16160200 |
| C            | 1.95182200  | 3.13326200  | 1.08892100  |
| C            | 1.62529100  | 4.41312800  | -1.36442900 |
| H            | 0.55136500  | 2.63679000  | -1.96288200 |
| C            | 2.49761600  | 4.40385000  | 0.88798200  |
| H            | 2.06483100  | 2.64646100  | 2.05578200  |
| C            | 2.33507400  | 5.04947200  | -0.34126200 |
| H            | 1.50174500  | 4.90433400  | -2.32705900 |
| H            | 3.03848600  | 4.89268400  | 1.69439600  |
| H            | 2.75515400  | 6.03945900  | -0.49971700 |
| F            | 1.52251600  | -0.73000200 | 2.38016300  |
| F            | 3.20025100  | -2.77628900 | 1.98073700  |
| F            | 4.26691300  | -3.24210400 | -0.50670700 |
| F            | 3.59176100  | -1.60473100 | -2.59186300 |
| F            | 1.90565600  | 0.44573400  | -2.22472900 |
| O            | -0.51162200 | 0.91133900  | -0.44375500 |
| K            | -2.54950400 | 2.69329300  | -0.72126700 |
| K            | -1.04484700 | -1.65468800 | 3.26768700  |
| <b>14-ts</b> |             |             |             |
| C            | 1.48107000  | 3.56279300  | -0.48309300 |
| C            | 1.63257800  | 2.68805100  | -1.78999800 |
| O            | 0.82984900  | 2.65782700  | 0.42348300  |
| O            | 1.80481600  | 1.36737600  | -1.26742400 |
| B            | 1.17347400  | 1.28001000  | 0.04602700  |
| O            | -0.00237100 | 0.37060400  | -0.09034100 |
| C            | -0.88228100 | -0.05335400 | 0.87674000  |

|   |             |             |             |
|---|-------------|-------------|-------------|
| O | -1.57730800 | -1.05392300 | 0.49078700  |
| O | -0.94527300 | 0.52819200  | 1.97924000  |
| C | 0.36445900  | 2.71277500  | -2.66496500 |
| H | 0.21412100  | 3.68229300  | -3.15406000 |
| H | 0.46929500  | 1.95582900  | -3.45270900 |
| H | -0.52940900 | 2.48144200  | -2.07838400 |
| C | 2.84659100  | 3.04130100  | -2.65551900 |
| H | 2.87793700  | 2.38319100  | -3.53200900 |
| H | 2.79259100  | 4.07665800  | -3.01534700 |
| H | 3.78284400  | 2.91072900  | -2.10659100 |
| C | 0.60715300  | 4.81049600  | -0.64488000 |
| H | 0.55678500  | 5.35689800  | 0.30520700  |
| H | 1.02381300  | 5.49175500  | -1.39744100 |
| H | -0.41386900 | 4.55137500  | -0.93600400 |
| C | 2.84210600  | 3.96487500  | 0.11702300  |
| H | 3.36585200  | 4.69961000  | -0.50564200 |
| H | 2.67645800  | 4.42520100  | 1.10016500  |
| H | 3.48871200  | 3.09293000  | 0.25122800  |
| C | 5.42859900  | -0.65892300 | -1.35313400 |
| C | 4.62318100  | -0.38620000 | -0.25071100 |
| C | 3.36170500  | -0.96329800 | -0.07538300 |
| C | 2.95200400  | -1.82868800 | -1.08844200 |
| C | 3.72752200  | -2.12098800 | -2.20635200 |
| C | 4.97981800  | -1.53264900 | -2.34076200 |
| C | 2.43241400  | -0.61448700 | 1.10444200  |
| H | 1.53372800  | -1.22619300 | 0.96929800  |
| C | 3.03685600  | -1.01416500 | 2.45104900  |
| C | 3.72332600  | -0.09479000 | 3.25600500  |
| C | 2.88384000  | -2.32936200 | 2.91078800  |
| C | 4.24596600  | -0.48434500 | 4.49320000  |
| H | 3.86320600  | 0.92040800  | 2.89778300  |
| C | 3.40847000  | -2.72281600 | 4.14470700  |
| H | 2.33696800  | -3.04938300 | 2.30479200  |
| C | 4.09218700  | -1.79989800 | 4.94167200  |
| H | 4.78464600  | 0.23813000  | 5.10223600  |
| H | 3.27398800  | -3.74588000 | 4.48682200  |
| H | 4.49930400  | -2.10212500 | 5.90314400  |
| F | 1.72348100  | -2.41763300 | -1.03833000 |
| F | 3.26473900  | -2.95281300 | -3.15895200 |
| F | 5.74444300  | -1.80104300 | -3.40801600 |
| F | 6.63357800  | -0.08036700 | -1.47546100 |
| F | 5.10451900  | 0.48633000  | 0.65218000  |
| O | 2.09280500  | 0.74762000  | 1.10217700  |
| C | -4.06972800 | -3.46346200 | 0.54778100  |
| C | -3.91110800 | -3.35999200 | -1.02222800 |

|           |             |             |             |
|-----------|-------------|-------------|-------------|
| O         | -3.39140100 | -2.01037400 | -1.20493300 |
| O         | -4.24832000 | -2.07626100 | 0.92716800  |
| B         | -3.67629300 | -1.28333900 | -0.03837900 |
| C         | -3.92206600 | 0.28673500  | -0.05176700 |
| C         | -3.59245800 | 1.09632800  | -1.14052600 |
| C         | -4.46497900 | 0.96592200  | 1.04674300  |
| C         | -3.78061100 | 2.47384800  | -1.16985000 |
| C         | -4.66557100 | 2.34606400  | 1.05911000  |
| C         | -4.32333200 | 3.10548600  | -0.05493600 |
| C         | -2.81675800 | -3.98492800 | 1.26803200  |
| H         | -2.96465100 | -3.87018600 | 2.34691100  |
| H         | -2.64545700 | -5.04716700 | 1.05598000  |
| H         | -1.93100000 | -3.40535300 | 0.99754600  |
| C         | -5.29813100 | -4.24521100 | 1.01700100  |
| H         | -5.24159800 | -5.29288300 | 0.69650100  |
| H         | -5.34110600 | -4.22747800 | 2.11095600  |
| H         | -6.22723800 | -3.81192500 | 0.63851200  |
| C         | -5.24448700 | -3.42364900 | -1.78164800 |
| H         | -5.07030400 | -3.16866500 | -2.83279500 |
| H         | -5.68759900 | -4.42498400 | -1.73985900 |
| H         | -5.96695300 | -2.70747400 | -1.37779000 |
| C         | -2.91987200 | -4.35154600 | -1.63324700 |
| H         | -3.25703900 | -5.38384000 | -1.48287300 |
| H         | -2.84467600 | -4.18444400 | -2.71495800 |
| H         | -1.92372400 | -4.25556700 | -1.19127300 |
| F         | -4.82153700 | 0.30379200  | 2.15750600  |
| F         | -5.18383600 | 2.95330300  | 2.14085100  |
| F         | -4.50948100 | 4.43408300  | -0.05425500 |
| F         | -3.43650700 | 3.19639200  | -2.25146000 |
| F         | -3.02811900 | 0.55116000  | -2.25660200 |
| K         | 0.72278300  | 2.10386900  | 3.01686000  |
| K         | -0.80574100 | -1.17676900 | -2.03249700 |
| <b>15</b> |             |             |             |
| C         | 1.47875000  | 3.70467900  | -0.03358300 |
| C         | 1.72915200  | 3.00949800  | -1.42837700 |
| O         | 0.86344200  | 2.64946500  | 0.73117400  |
| O         | 1.98688700  | 1.64925600  | -1.05477600 |
| B         | 1.29023300  | 1.36352100  | 0.18177200  |
| O         | 0.12384900  | 0.44884600  | -0.17639500 |
| C         | -0.82342500 | -0.01879400 | 0.64069200  |
| O         | -1.47788000 | -0.99276800 | 0.04567300  |
| O         | -1.03420000 | 0.39207700  | 1.78408600  |
| C         | 0.48697500  | 3.04791200  | -2.33956900 |
| H         | 0.28251600  | 4.05545700  | -2.71961200 |
| H         | 0.67104900  | 2.39779800  | -3.20427500 |

|   |             |             |             |
|---|-------------|-------------|-------------|
| H | -0.40534600 | 2.68829800  | -1.81855400 |
| C | 2.93846200  | 3.54393100  | -2.20150200 |
| H | 3.03739100  | 3.00333800  | -3.14997500 |
| H | 2.82341200  | 4.61015000  | -2.43376500 |
| H | 3.86612700  | 3.40598200  | -1.63997000 |
| C | 0.52487000  | 4.90149800  | -0.07403100 |
| H | 0.41069000  | 5.32276200  | 0.93237100  |
| H | 0.91423000  | 5.69546200  | -0.72324900 |
| H | -0.46712700 | 4.61330200  | -0.43070100 |
| C | 2.78864600  | 4.10975200  | 0.66672800  |
| H | 3.28054800  | 4.95084500  | 0.16459700  |
| H | 2.56231900  | 4.42630300  | 1.69330000  |
| H | 3.48914400  | 3.27053400  | 0.71263200  |
| C | 5.57570200  | -0.34516200 | -1.27290300 |
| C | 4.72416900  | -0.23745500 | -0.17667200 |
| C | 3.46235600  | -0.83826000 | -0.14043900 |
| C | 3.09868300  | -1.54772300 | -1.28461600 |
| C | 3.92212100  | -1.67224600 | -2.39939600 |
| C | 5.17450700  | -1.06819300 | -2.39403600 |
| C | 2.48217500  | -0.67226400 | 1.03428300  |
| H | 1.60261600  | -1.27031000 | 0.77291300  |
| C | 3.02709000  | -1.24425300 | 2.34258200  |
| C | 3.65575200  | -0.43576400 | 3.29950000  |
| C | 2.87216100  | -2.61133200 | 2.61028300  |
| C | 4.12015900  | -0.98558000 | 4.49856600  |
| H | 3.79768100  | 0.61994800  | 3.09024300  |
| C | 3.33936400  | -3.16403100 | 3.80559500  |
| H | 2.36997200  | -3.24774500 | 1.88406700  |
| C | 3.96516000  | -2.35136800 | 4.75541400  |
| H | 4.61480400  | -0.34803200 | 5.22777700  |
| H | 3.20513200  | -4.22538400 | 3.99792200  |
| H | 4.32708200  | -2.77780000 | 5.68736700  |
| F | 1.87463900  | -2.13835300 | -1.36936500 |
| F | 3.50534600  | -2.35670400 | -3.48092500 |
| F | 5.98401000  | -1.17745200 | -3.45561700 |
| F | 6.77872600  | 0.24902600  | -1.26078300 |
| F | 5.15873200  | 0.49713100  | 0.86229500  |
| O | 2.11174000  | 0.67537000  | 1.20952200  |
| C | -3.54583200 | -3.56089300 | 0.25083300  |
| C | -3.82668500 | -3.16267500 | -1.24866500 |
| O | -3.08700800 | -1.93631600 | -1.37840800 |
| O | -3.46080800 | -2.28477400 | 0.89323800  |
| B | -2.99713900 | -1.30800300 | -0.04078100 |
| C | -3.78440900 | 0.14374800  | 0.05598900  |
| C | -3.69283900 | 1.08346800  | -0.96940900 |

|              |             |             |             |
|--------------|-------------|-------------|-------------|
| C            | -4.58446100 | 0.54357300  | 1.13102300  |
| C            | -4.34192700 | 2.31404300  | -0.97800200 |
| C            | -5.25593700 | 1.76753800  | 1.17100800  |
| C            | -5.13692400 | 2.65949600  | 0.11001100  |
| C            | -2.20634200 | -4.30212300 | 0.43269200  |
| H            | -1.98315600 | -4.35798900 | 1.50371700  |
| H            | -2.24459000 | -5.32399500 | 0.03523100  |
| H            | -1.38320000 | -3.76653700 | -0.05069900 |
| C            | -4.66222900 | -4.36864300 | 0.91967200  |
| H            | -4.82832800 | -5.32252300 | 0.40221200  |
| H            | -4.38398300 | -4.58903600 | 1.95637800  |
| H            | -5.60183200 | -3.81083000 | 0.93981900  |
| C            | -5.31268900 | -2.86481500 | -1.51895300 |
| H            | -5.40850900 | -2.40079300 | -2.50736100 |
| H            | -5.92190500 | -3.77627800 | -1.50778700 |
| H            | -5.71725000 | -2.16883900 | -0.77784900 |
| C            | -3.31390100 | -4.16184800 | -2.29032400 |
| H            | -3.80755400 | -5.13531600 | -2.18085800 |
| H            | -3.53126200 | -3.79170900 | -3.30015600 |
| H            | -2.23369600 | -4.31824800 | -2.20592600 |
| F            | -4.74467300 | -0.24473900 | 2.21043200  |
| F            | -6.01360900 | 2.10261100  | 2.23315200  |
| F            | -5.77651900 | 3.84150600  | 0.13650800  |
| F            | -4.20273600 | 3.16966200  | -2.01065300 |
| F            | -2.90171900 | 0.83402900  | -2.06398200 |
| K            | 0.59412200  | 1.74635000  | 3.20938700  |
| K            | -0.76476900 | -0.89373800 | -2.44852300 |
| <b>16-ts</b> |             |             |             |
| C            | 1.74961600  | -3.46780700 | -1.39753700 |
| C            | 2.01912300  | -3.40549000 | 0.16252000  |
| O            | 1.27412000  | -2.12794100 | -1.69321700 |
| O            | 2.33988800  | -2.01158200 | 0.36008300  |
| B            | 1.76417300  | -1.27282800 | -0.67168700 |
| O            | -1.99581800 | -0.07607300 | 0.93371500  |
| C            | -0.61411700 | -0.01434200 | 0.87375800  |
| O            | -0.08957700 | -0.76195200 | -0.00844400 |
| O            | -0.03394200 | 0.70935700  | 1.71292900  |
| C            | 0.78774700  | -3.74545500 | 1.01768600  |
| H            | 0.54018900  | -4.81222400 | 0.96150400  |
| H            | 1.01287100  | -3.50212800 | 2.06158300  |
| H            | -0.08347700 | -3.15515400 | 0.72332800  |
| C            | 3.21080500  | -4.24202300 | 0.63476100  |
| H            | 3.33731000  | -4.11704100 | 1.71561400  |
| H            | 3.04738000  | -5.30833500 | 0.43508800  |
| H            | 4.14048500  | -3.93390300 | 0.15018200  |

|   |             |             |             |
|---|-------------|-------------|-------------|
| C | 0.68021300  | -4.47626100 | -1.82222100 |
| H | 0.53136200  | -4.42595300 | -2.90810600 |
| H | 0.98755900  | -5.50050600 | -1.58025300 |
| H | -0.27815100 | -4.28981600 | -1.32761000 |
| C | 3.02337300  | -3.68740800 | -2.22855200 |
| H | 3.42350500  | -4.69995800 | -2.10354200 |
| H | 2.78646500  | -3.54054300 | -3.28811000 |
| H | 3.80272200  | -2.96819200 | -1.95949500 |
| C | 6.42656500  | -0.40381100 | -0.00347200 |
| C | 5.18136000  | 0.02803700  | -0.45435200 |
| C | 4.15316200  | 0.39351600  | 0.41952500  |
| C | 4.44907500  | 0.32003200  | 1.78206900  |
| C | 5.68604800  | -0.10353700 | 2.26292700  |
| C | 6.68191700  | -0.47098700 | 1.36375100  |
| C | 2.76983300  | 0.85703000  | -0.05973000 |
| H | 2.10582300  | 0.87253200  | 0.81021700  |
| C | 2.85620900  | 2.27237000  | -0.62499300 |
| C | 2.94461100  | 2.51352800  | -2.00098500 |
| C | 2.87137600  | 3.35988000  | 0.25965400  |
| C | 3.05305800  | 3.82166200  | -2.48264000 |
| H | 2.92483300  | 1.67354600  | -2.68711300 |
| C | 2.98172800  | 4.66725300  | -0.22057500 |
| H | 2.79123000  | 3.18102400  | 1.33007700  |
| C | 3.07427300  | 4.90260700  | -1.59617300 |
| H | 3.12305400  | 3.99569800  | -3.55396400 |
| H | 2.99186900  | 5.50059400  | 0.47810100  |
| H | 3.16042300  | 5.91880700  | -1.97314700 |
| F | 3.52095500  | 0.66776800  | 2.69683800  |
| F | 5.92247800  | -0.16172400 | 3.58484700  |
| F | 7.87949100  | -0.88041500 | 1.80897200  |
| F | 7.38486000  | -0.75281300 | -0.87930100 |
| F | 4.99711800  | 0.07566600  | -1.78703300 |
| O | 2.23723300  | -0.02197000 | -1.03905600 |
| C | -2.40794700 | 2.27768200  | -1.61406700 |
| C | -3.25915800 | 2.97820900  | -0.48841000 |
| O | -3.10576400 | 2.07244900  | 0.61194200  |
| O | -2.58362200 | 0.87747200  | -1.31276000 |
| B | -2.95711800 | 0.69310800  | 0.09424800  |
| C | -4.35428200 | -0.21054900 | 0.27337300  |
| C | -5.13626000 | -0.12803400 | 1.42419200  |
| C | -4.80608100 | -1.15436700 | -0.64533500 |
| C | -6.29596000 | -0.86626500 | 1.64441400  |
| C | -5.95827000 | -1.92160600 | -0.48285400 |
| C | -6.71783500 | -1.77065500 | 0.67330500  |
| C | -0.91213400 | 2.61875600  | -1.52756800 |

|           |             |             |             |
|-----------|-------------|-------------|-------------|
| H         | -0.34583300 | 1.96585300  | -2.20086200 |
| H         | -0.71099900 | 3.65286000  | -1.82961100 |
| H         | -0.51674300 | 2.46870600  | -0.51973300 |
| C         | -2.90734500 | 2.53557700  | -3.04012500 |
| H         | -2.88944500 | 3.60657400  | -3.27683600 |
| H         | -2.25357400 | 2.03186500  | -3.76339300 |
| H         | -3.92429100 | 2.16252800  | -3.18752600 |
| C         | -4.75461200 | 3.08643300  | -0.84298300 |
| H         | -5.30918900 | 3.39625700  | 0.04993200  |
| H         | -4.93338300 | 3.82881100  | -1.62949100 |
| H         | -5.16256100 | 2.12760500  | -1.17617800 |
| C         | -2.74555200 | 4.35822500  | -0.06556500 |
| H         | -2.76760400 | 5.06458500  | -0.90435700 |
| H         | -3.38839200 | 4.76406200  | 0.72532400  |
| H         | -1.72027900 | 4.31048600  | 0.31226500  |
| F         | -4.09312600 | -1.41089300 | -1.78686900 |
| F         | -6.33453800 | -2.81322900 | -1.41854000 |
| F         | -7.83189400 | -2.49675000 | 0.85657300  |
| F         | -7.00332800 | -0.72719000 | 2.78090400  |
| F         | -4.76604700 | 0.70132900  | 2.45009000  |
| K         | -2.10589500 | 1.67069500  | 3.00688600  |
| K         | -1.27650100 | -1.24948800 | -2.24053600 |
| <b>17</b> |             |             |             |
| C         | -4.00064800 | -0.33220600 | -0.79214500 |
| C         | -3.71036500 | -0.34294100 | 0.76461900  |
| O         | -2.92200500 | 0.50349600  | -1.30547900 |
| O         | -2.26370400 | -0.14139000 | 0.80776100  |
| B         | -1.90990000 | 0.46139700  | -0.37944500 |
| C         | -4.34511300 | 0.83778900  | 1.51186900  |
| H         | -5.43429300 | 0.73613800  | 1.57105600  |
| H         | -3.94744300 | 0.86803800  | 2.53165300  |
| H         | -4.11330500 | 1.79328400  | 1.02944100  |
| C         | -4.03728400 | -1.65344200 | 1.47647400  |
| H         | -3.77480400 | -1.57174900 | 2.53663100  |
| H         | -5.10913400 | -1.87440400 | 1.40871300  |
| H         | -3.48062000 | -2.49418300 | 1.05564800  |
| C         | -5.33273600 | 0.29644100  | -1.19573400 |
| H         | -5.43252700 | 0.27563500  | -2.28612200 |
| H         | -6.17307300 | -0.26274800 | -0.76725200 |
| H         | -5.40350300 | 1.33755300  | -0.87198300 |
| C         | -3.84743200 | -1.71066900 | -1.45008900 |
| H         | -4.66239100 | -2.38583000 | -1.16672400 |
| H         | -3.86548800 | -1.58659900 | -2.53765100 |
| H         | -2.89700400 | -2.18345300 | -1.18061600 |
| C         | 2.60390000  | -1.72384700 | -1.28367300 |

|           |             |             |             |
|-----------|-------------|-------------|-------------|
| C         | 1.81963700  | -0.58738800 | -1.10061400 |
| C         | 1.23235400  | -0.27803700 | 0.13173000  |
| C         | 1.48173100  | -1.16563600 | 1.18086100  |
| C         | 2.26668900  | -2.30710600 | 1.02775300  |
| C         | 2.82783200  | -2.58912600 | -0.21415000 |
| C         | 0.35641800  | 0.95886900  | 0.33848800  |
| H         | -0.08988000 | 0.87227000  | 1.33266000  |
| C         | 1.16695500  | 2.25028300  | 0.28342600  |
| C         | 1.12947700  | 3.09801200  | -0.82874000 |
| C         | 1.97120900  | 2.59033400  | 1.38061400  |
| C         | 1.89372100  | 4.26909800  | -0.84315700 |
| H         | 0.50115500  | 2.84036200  | -1.67427800 |
| C         | 2.73623700  | 3.75831200  | 1.36375600  |
| H         | 1.99648300  | 1.94333600  | 2.25573400  |
| C         | 2.69989000  | 4.60182000  | 0.24864500  |
| H         | 1.85702700  | 4.92183400  | -1.71173400 |
| H         | 3.35323000  | 4.01202600  | 2.22201600  |
| H         | 3.29229800  | 5.51306500  | 0.23379300  |
| F         | 0.96585600  | -0.92921200 | 2.40495000  |
| F         | 2.47980000  | -3.13274800 | 2.06353200  |
| F         | 3.58235200  | -3.68252700 | -0.38007600 |
| F         | 3.14727000  | -1.99046000 | -2.48045900 |
| F         | 1.64297400  | 0.22024100  | -2.15786800 |
| O         | -0.67758300 | 0.98132300  | -0.64404000 |
| <b>18</b> |             |             |             |
| C         | 2.23586900  | -0.89264300 | -1.34664000 |
| C         | 2.58542700  | 0.61772200  | -1.06332100 |
| O         | 1.36882900  | 1.11524500  | -0.49251100 |
| O         | 1.36497800  | -1.20841700 | -0.25634100 |
| B         | 0.62298700  | 0.00728200  | 0.15995600  |
| C         | -0.97174600 | -0.00315100 | -0.35230900 |
| C         | -1.72148100 | -1.17293100 | -0.48610700 |
| C         | -1.68210000 | 1.15210900  | -0.68207100 |
| C         | -3.03954100 | -1.20463100 | -0.93223400 |
| C         | -2.99966000 | 1.15355800  | -1.13031100 |
| C         | -3.70415400 | -0.03400200 | -1.26912600 |
| O         | 0.68595400  | 0.11536700  | 1.63626400  |
| C         | -0.41534000 | 0.19683700  | 2.55383800  |
| O         | -0.78394900 | 1.35928100  | 2.83422300  |
| O         | -0.82029800 | -0.90321300 | 2.99105200  |
| C         | 3.71820500  | 0.77429900  | -0.02898800 |
| H         | 4.69137400  | 0.46584400  | -0.42934200 |
| H         | 3.80148900  | 1.83235400  | 0.25223300  |
| H         | 3.50838500  | 0.19714500  | 0.87670200  |
| C         | 2.92084000  | 1.44027000  | -2.31152900 |



|              |             |             |             |
|--------------|-------------|-------------|-------------|
| H            | 3.15483800  | 2.47352500  | -2.02689800 |
| H            | 3.79646900  | 1.03223000  | -2.83222100 |
| H            | 2.08001000  | 1.46849300  | -3.00894400 |
| C            | 3.43466300  | -1.84664900 | -1.31164300 |
| H            | 3.09930800  | -2.86954800 | -1.52211100 |
| H            | 4.17839500  | -1.57893200 | -2.07234000 |
| H            | 3.92523800  | -1.84261500 | -0.33345600 |
| C            | 1.47616800  | -1.08756900 | -2.67312000 |
| H            | 2.12914300  | -0.94518200 | -3.54243900 |
| H            | 1.08028000  | -2.10875500 | -2.70743600 |
| H            | 0.63245200  | -0.39656700 | -2.75787000 |
| F            | -1.17662200 | -2.38804500 | -0.15993300 |
| F            | -3.68079300 | -2.39191300 | -1.03449200 |
| F            | -3.60164100 | 2.32821300  | -1.42930800 |
| F            | -1.09622900 | 2.38538700  | -0.55728100 |
| K            | 0.70624300  | 2.89049100  | 1.41887200  |
| K            | 0.66167000  | -2.65403100 | 1.84669300  |
| H            | -4.73211600 | -0.04533900 | -1.61240900 |
| <b>19-ts</b> |             |             |             |
| C            | 0.12417100  | 2.78847800  | -0.29409900 |
| C            | 0.63787500  | 2.37005800  | 1.15225300  |
| O            | 0.65748300  | 0.92253600  | 1.08506500  |
| O            | 0.45936900  | 1.63218700  | -1.09939700 |
| B            | 0.63969800  | 0.55668700  | -0.25483900 |
| C            | -1.50837300 | -0.62278100 | -0.30314000 |
| C            | -2.49882400 | -0.23715600 | -1.19568800 |
| C            | -2.00704700 | -1.22972100 | 0.83238700  |
| C            | -3.86466700 | -0.39289000 | -0.95509300 |
| C            | -3.35565200 | -1.41442600 | 1.12704600  |
| C            | -4.31844600 | -0.98115100 | 0.22286300  |
| O            | 1.33629500  | -0.60868800 | -0.68988300 |
| C            | 2.66490300  | -0.83501400 | -0.48407400 |
| O            | 3.46492900  | 0.12150600  | -0.35622000 |
| O            | 2.97599600  | -2.08041400 | -0.46218100 |
| C            | 2.07973200  | 2.81656700  | 1.44525500  |
| H            | 2.15567000  | 3.90623600  | 1.54276700  |
| H            | 2.39807000  | 2.36544800  | 2.39222100  |
| H            | 2.76508100  | 2.47270900  | 0.66563700  |
| C            | -0.27464400 | 2.79245600  | 2.30569300  |
| H            | 0.14230000  | 2.42794100  | 3.25131200  |
| H            | -0.34983700 | 3.88544600  | 2.36660400  |
| H            | -1.27991300 | 2.37794400  | 2.20134500  |
| C            | 0.83976800  | 3.99875000  | -0.90046400 |
| H            | 0.43938100  | 4.19026600  | -1.90210100 |
| H            | 0.67746300  | 4.89719200  | -0.29195800 |

|           |             |             |             |
|-----------|-------------|-------------|-------------|
| H         | 1.91477400  | 3.82593100  | -0.99466000 |
| C         | -1.39325100 | 3.00928800  | -0.37184800 |
| H         | -1.68724200 | 3.93014100  | 0.14592400  |
| H         | -1.68408600 | 3.09386400  | -1.42373000 |
| H         | -1.94904400 | 2.17434400  | 0.05943100  |
| F         | -2.16286500 | 0.33525600  | -2.39446600 |
| F         | -4.78063800 | 0.02186600  | -1.87314300 |
| F         | -3.74712700 | -2.02836900 | 2.27988300  |
| F         | -1.10621700 | -1.77114500 | 1.76553200  |
| K         | 5.47290900  | -1.42247700 | -0.21026600 |
| K         | 0.36403200  | -2.92031000 | -0.23513700 |
| H         | -5.37723100 | -1.10819700 | 0.41819300  |
| <b>20</b> |             |             |             |
| C         | 2.14090500  | -1.11386400 | -1.19806800 |
| C         | 2.48651400  | 0.42358600  | -1.18342000 |
| O         | 1.27151300  | 1.00991900  | -0.70443600 |
| O         | 1.27462500  | -1.23776900 | -0.06802300 |
| B         | 0.52248800  | 0.02920800  | 0.13097900  |
| C         | -1.06495900 | -0.07197100 | -0.36804500 |
| C         | -1.83110100 | -1.23877000 | -0.30657100 |
| C         | -1.79666700 | 0.99001900  | -0.90559600 |
| C         | -3.14112200 | -1.39791200 | -0.74686200 |
| C         | -3.10509900 | 0.94525800  | -1.37568400 |
| C         | -3.75457500 | -0.27716300 | -1.28658700 |
| O         | 0.59876100  | 0.38748700  | 1.57079400  |
| C         | -0.49425900 | 0.63866900  | 2.46483400  |
| O         | -0.87738200 | 1.82950800  | 2.51508300  |
| O         | -0.88018800 | -0.35628100 | 3.11886500  |
| C         | 3.62364900  | 0.76214100  | -0.19813900 |
| H         | 4.59512300  | 0.38441100  | -0.53886100 |
| H         | 3.70958700  | 1.85361300  | -0.11318100 |
| H         | 3.41611500  | 0.35948200  | 0.79804100  |
| C         | 2.81388600  | 1.01776400  | -2.55760200 |
| H         | 3.04006800  | 2.08662200  | -2.45772500 |
| H         | 3.69165400  | 0.53270800  | -3.00361500 |
| H         | 1.97123400  | 0.91833700  | -3.24633900 |
| C         | 3.34251900  | -2.04487200 | -1.00164900 |
| H         | 3.00823300  | -3.08938000 | -1.02743100 |
| H         | 4.08335800  | -1.91486300 | -1.80047500 |
| H         | 3.83703800  | -1.86928600 | -0.04138800 |
| C         | 1.37835100  | -1.53789000 | -2.46836400 |
| H         | 2.02738200  | -1.54520800 | -3.35219100 |
| H         | 0.98696500  | -2.55111100 | -2.32355200 |
| H         | 0.53131500  | -0.87450300 | -2.66497400 |
| F         | -1.27284000 | -2.37323100 | 0.24453300  |

|              |             |             |             |
|--------------|-------------|-------------|-------------|
| F            | -1.20373200 | 2.23242300  | -0.98584700 |
| K            | 0.61074500  | 3.07726400  | 0.85519700  |
| K            | 0.58093500  | -2.28174200 | 2.25813500  |
| F            | -5.03304700 | -0.37722900 | -1.73247100 |
| H            | -3.59463700 | 1.82406100  | -1.77846400 |
| H            | -3.65811800 | -2.34640100 | -0.66173700 |
| <b>21-ts</b> |             |             |             |
| C            | -0.08195000 | 2.71444500  | -0.46642300 |
| C            | 0.43722900  | 2.39517200  | 1.00472600  |
| O            | 0.53324100  | 0.94986600  | 1.01157600  |
| O            | 0.31133500  | 1.53454400  | -1.20787800 |
| B            | 0.54114700  | 0.51559000  | -0.30726400 |
| C            | -1.58923500 | -0.77025800 | -0.30856700 |
| C            | -2.60253800 | -0.44491800 | -1.20462400 |
| C            | -2.12431800 | -1.28718800 | 0.85599300  |
| C            | -3.98125200 | -0.55007500 | -0.99317600 |
| C            | -3.46570400 | -1.44767500 | 1.21043900  |
| C            | -4.37890800 | -1.04903000 | 0.24175500  |
| O            | 1.29012200  | -0.63620200 | -0.68013100 |
| C            | 2.61152100  | -0.82072700 | -0.39982700 |
| O            | 3.38419700  | 0.16065100  | -0.28885200 |
| O            | 2.94861100  | -2.05481900 | -0.29626700 |
| C            | 1.84970100  | 2.93346500  | 1.28473000  |
| H            | 1.86634900  | 4.02953300  | 1.31526600  |
| H            | 2.18040300  | 2.55795900  | 2.26008800  |
| H            | 2.56158600  | 2.58034600  | 0.53357100  |
| C            | -0.50921100 | 2.82614200  | 2.12742400  |
| H            | -0.08485900 | 2.53056100  | 3.09365400  |
| H            | -0.64112700 | 3.91546800  | 2.13339400  |
| H            | -1.49058700 | 2.35542200  | 2.03418000  |
| C            | 0.58589000  | 3.92166000  | -1.13131200 |
| H            | 0.18990900  | 4.03873600  | -2.14614800 |
| H            | 0.37524700  | 4.84424400  | -0.57596400 |
| H            | 1.66880000  | 3.79415400  | -1.20512900 |
| C            | -1.60649100 | 2.86570400  | -0.56539900 |
| H            | -1.94325600 | 3.79645200  | -0.09331900 |
| H            | -1.89033100 | 2.88963100  | -1.62243800 |
| H            | -2.13024400 | 2.02842300  | -0.10051000 |
| F            | -2.25232500 | 0.03868700  | -2.44603000 |
| F            | -1.21594400 | -1.78386100 | 1.82199800  |
| K            | 5.41185200  | -1.32333500 | 0.04637900  |
| K            | 0.33280300  | -2.93652900 | -0.13529200 |
| F            | -5.71320100 | -1.17021600 | 0.50612600  |
| H            | -4.70703700 | -0.26036800 | -1.74575100 |
| H            | -3.78424600 | -1.85520000 | 2.16388800  |

**22**

|   |             |             |             |
|---|-------------|-------------|-------------|
| C | 2.25218800  | -0.89522500 | -0.86253000 |
| C | 2.48956800  | 0.63543900  | -0.57535400 |
| O | 1.16020000  | 1.11848100  | -0.35874100 |
| O | 1.14472400  | -1.19122600 | -0.00995600 |
| B | 0.28684700  | 0.01648800  | 0.13792600  |
| C | -1.11692400 | -0.06926400 | -0.75556900 |
| C | -1.80386300 | -1.25647900 | -1.02440400 |
| C | -1.75363700 | 1.02907900  | -1.34029500 |
| C | -2.94838200 | -1.39023300 | -1.80138300 |
| C | -2.89573000 | 0.99668600  | -2.13134800 |
| C | -3.49737300 | -0.23980400 | -2.36867100 |
| O | -0.01611700 | 0.19127700  | 1.58189900  |
| C | -1.30266200 | 0.28871100  | 2.20720700  |
| O | -1.75758900 | 1.45071400  | 2.30981700  |
| O | -1.77188700 | -0.79499500 | 2.62235800  |
| C | 3.32066900  | 0.87009200  | 0.70271000  |
| H | 4.36856100  | 0.57150500  | 0.57714700  |
| H | 3.31203800  | 1.94146900  | 0.94330800  |
| H | 2.89704200  | 0.32764000  | 1.55343900  |
| C | 3.11570200  | 1.41535500  | -1.73646800 |
| H | 3.24422400  | 2.46735400  | -1.45278300 |
| H | 4.10518300  | 1.01781000  | -1.99616100 |
| H | 2.48101800  | 1.38491100  | -2.62562100 |
| C | 3.42303600  | -1.80949400 | -0.48475300 |
| H | 3.16877400  | -2.85069700 | -0.71849900 |
| H | 4.32748400  | -1.55440100 | -1.05108100 |
| H | 3.65577600  | -1.74708200 | 0.58275100  |
| C | 1.85159200  | -1.16823700 | -2.32543700 |
| H | 2.69677200  | -1.03894000 | -3.01217100 |
| H | 1.49906600  | -2.20252500 | -2.40768400 |
| H | 1.03909600  | -0.50985000 | -2.64584700 |
| F | -1.33257300 | -2.43567500 | -0.47407400 |
| F | -1.23165200 | 2.29164500  | -1.12067800 |
| K | -0.00630100 | 2.94623200  | 1.20178400  |
| K | -0.04347300 | -2.55004200 | 1.91336700  |
| H | -3.29907100 | 1.91973300  | -2.53486600 |
| H | -3.39296100 | -2.36995500 | -1.94271700 |
| H | -4.39327600 | -0.30451300 | -2.97918700 |

**23-ts**

|   |             |            |             |
|---|-------------|------------|-------------|
| C | -0.59147600 | 2.61627100 | -0.46004900 |
| C | 0.00057900  | 2.36578000 | 0.99684600  |
| O | 0.25220100  | 0.93934100 | 1.00736800  |
| O | -0.09819700 | 1.47827000 | -1.20697700 |
| B | 0.26379200  | 0.49739200 | -0.30836600 |

|           |             |             |             |
|-----------|-------------|-------------|-------------|
| C         | -1.74745200 | -1.00132000 | -0.23540400 |
| C         | -2.80497500 | -0.78552200 | -1.11370300 |
| C         | -2.20863300 | -1.55742900 | 0.94379500  |
| C         | -4.15897000 | -1.02440700 | -0.86650600 |
| C         | -3.52106700 | -1.84069300 | 1.31949000  |
| C         | -4.51672400 | -1.55039500 | 0.38014900  |
| O         | 1.10946600  | -0.57930400 | -0.69576300 |
| C         | 2.44701300  | -0.63432800 | -0.43715400 |
| O         | 3.12550400  | 0.41767400  | -0.35800100 |
| O         | 2.90136200  | -1.82854000 | -0.31893200 |
| C         | 1.35426500  | 3.05398100  | 1.23548400  |
| H         | 1.25461500  | 4.14568900  | 1.26699000  |
| H         | 1.75127700  | 2.71807700  | 2.20047500  |
| H         | 2.07856000  | 2.77789800  | 0.46420500  |
| C         | -0.95521000 | 2.69894100  | 2.14466900  |
| H         | -0.47672000 | 2.45045400  | 3.09882200  |
| H         | -1.19899000 | 3.76876500  | 2.15519500  |
| H         | -1.88440100 | 2.12857300  | 2.07692800  |
| C         | -0.07429400 | 3.88143700  | -1.15170300 |
| H         | -0.50630200 | 3.94387600  | -2.15667400 |
| H         | -0.36957600 | 4.78204500  | -0.59876600 |
| H         | 1.01389300  | 3.87103300  | -1.25328300 |
| C         | -2.12573700 | 2.60479900  | -0.51458400 |
| H         | -2.54519400 | 3.49523000  | -0.03094200 |
| H         | -2.44061700 | 2.59727400  | -1.56303000 |
| H         | -2.54333000 | 1.71629300  | -0.03753500 |
| F         | -2.52126100 | -0.28090000 | -2.36845300 |
| F         | -1.22902800 | -1.95230500 | 1.89674800  |
| K         | 5.28756600  | -0.86133200 | -0.02872800 |
| K         | 0.37623900  | -2.94657200 | -0.07568600 |
| H         | -4.90485900 | -0.80447800 | -1.62562500 |
| H         | -3.75278800 | -2.26662400 | 2.29185100  |
| H         | -5.56085200 | -1.74425300 | 0.61288100  |
| <b>24</b> |             |             |             |
| C         | 2.18119800  | -0.24902100 | -1.26275800 |
| C         | 2.51853400  | 0.69289500  | -0.04181300 |
| O         | 1.22026900  | 1.06100500  | 0.43738300  |
| O         | 0.99098700  | -0.90424000 | -0.82391200 |
| B         | 0.22114700  | 0.00113200  | 0.07864200  |
| C         | -1.08655300 | 0.69968500  | -0.63069400 |
| C         | -2.06563000 | 0.00913600  | -1.34170900 |
| C         | -1.30101600 | 2.09219000  | -0.57973400 |
| C         | -3.18122700 | 0.57430300  | -1.94566500 |
| C         | -2.40720500 | 2.71892200  | -1.16278700 |
| C         | -3.35811500 | 1.95630600  | -1.84612500 |

|              |             |             |             |
|--------------|-------------|-------------|-------------|
| O            | -0.14081500 | -0.79753800 | 1.28714600  |
| C            | -1.41267700 | -1.00632100 | 1.91013000  |
| O            | -1.81757800 | -0.07250500 | 2.64390400  |
| O            | -1.91982600 | -2.12931800 | 1.69742800  |
| C            | 3.26781800  | -0.05061800 | 1.08245400  |
| H            | 4.29149700  | -0.31767700 | 0.79383200  |
| H            | 3.33676900  | 0.60400600  | 1.96181600  |
| H            | 2.73269100  | -0.95872100 | 1.37591600  |
| C            | 3.29051100  | 1.96460000  | -0.41056600 |
| H            | 3.47716800  | 2.56199000  | 0.49090800  |
| H            | 4.26442700  | 1.72571100  | -0.85653400 |
| H            | 2.72769600  | 2.58420300  | -1.11345200 |
| C            | 3.24701100  | -1.30946800 | -1.56346400 |
| H            | 2.93337800  | -1.91319600 | -2.42393700 |
| H            | 4.20996900  | -0.84813600 | -1.81602500 |
| H            | 3.39895300  | -1.98184900 | -0.71355700 |
| C            | 1.87991000  | 0.53848700  | -2.55295700 |
| H            | 2.78526700  | 0.98677700  | -2.97996600 |
| H            | 1.45758600  | -0.14961000 | -3.29393300 |
| H            | 1.14673100  | 1.33046300  | -2.37711800 |
| F            | -1.93712100 | -1.36487700 | -1.49995700 |
| K            | 0.11457500  | 1.53679600  | 2.78957400  |
| K            | -0.39628400 | -3.07701600 | -0.14963800 |
| H            | -0.54652100 | 2.70590900  | -0.09102000 |
| H            | -2.52233400 | 3.79812700  | -1.09185100 |
| H            | -4.22426900 | 2.42671800  | -2.30419100 |
| H            | -3.88783800 | -0.05809600 | -2.47473700 |
| <b>25-ts</b> |             |             |             |
| C            | -0.62447200 | 2.55692500  | -0.46082000 |
| C            | 0.10154600  | 2.27489700  | 0.93015400  |
| O            | 0.44578400  | 0.86481400  | 0.84070600  |
| O            | -0.13537100 | 1.48258300  | -1.30755400 |
| B            | 0.34387000  | 0.48770000  | -0.49773100 |
| C            | -1.91798300 | -1.03698700 | -0.38376900 |
| C            | -2.49417700 | -1.02403500 | -1.67864900 |
| C            | -2.83241500 | -1.43107500 | 0.57082300  |
| C            | -3.83231800 | -1.35450000 | -1.93950900 |
| C            | -4.17391000 | -1.77120200 | 0.41441900  |
| C            | -4.68237600 | -1.72465400 | -0.88805300 |
| O            | 1.07728200  | -0.62041400 | -0.93820800 |
| C            | 2.40433000  | -0.76867300 | -0.59486400 |
| O            | 3.22641900  | 0.10767400  | -0.95236300 |
| O            | 2.68041500  | -1.84030300 | 0.04147000  |
| C            | 1.42810900  | 3.03180700  | 1.09780000  |
| H            | 1.26903500  | 4.11176700  | 1.19707800  |

|           |             |             |             |
|-----------|-------------|-------------|-------------|
| H         | 1.92465900  | 2.67525000  | 2.00762400  |
| H         | 2.10081000  | 2.84818800  | 0.25440900  |
| C         | -0.77712300 | 2.48280300  | 2.16413800  |
| H         | -0.20312300 | 2.24268800  | 3.06691600  |
| H         | -1.10309600 | 3.52723000  | 2.24146600  |
| H         | -1.66036700 | 1.84056000  | 2.14262900  |
| C         | -0.23161400 | 3.88048900  | -1.12308900 |
| H         | -0.75069000 | 3.96857300  | -2.08344600 |
| H         | -0.52646100 | 4.73345200  | -0.49928600 |
| H         | 0.84260900  | 3.93850000  | -1.31605000 |
| C         | -2.15381300 | 2.45479300  | -0.39431800 |
| H         | -2.57985800 | 3.28023500  | 0.18841500  |
| H         | -2.55418000 | 2.50996300  | -1.41193800 |
| H         | -2.47645700 | 1.50369200  | 0.03263800  |
| F         | -2.36203000 | -1.53926300 | 1.93042900  |
| K         | 5.20223600  | -1.37534500 | -0.34319200 |
| K         | 0.17786600  | -2.04870600 | 1.22920100  |
| H         | -1.87302700 | -0.72840100 | -2.52680400 |
| H         | -4.21736000 | -1.32165100 | -2.95836500 |
| H         | -5.72364900 | -1.97795600 | -1.07553200 |
| H         | -4.79078300 | -2.05861000 | 1.26288500  |
| <b>26</b> |             |             |             |
| C         | -2.10667900 | -1.24804700 | -0.95217600 |
| C         | -2.22453600 | -1.33643100 | 0.62094100  |
| O         | -0.93698200 | -0.88960200 | 1.05381100  |
| O         | -1.26170300 | -0.10886200 | -1.13652100 |
| B         | -0.35211100 | 0.04960000  | 0.04651600  |
| C         | 1.21077400  | -0.35049600 | -0.23406000 |
| C         | 2.07417700  | 0.44090900  | -1.02053700 |
| C         | 1.75792200  | -1.54481700 | 0.27559400  |
| C         | 3.39408300  | 0.07063500  | -1.29416100 |
| C         | 3.07890700  | -1.94281000 | 0.02601300  |
| C         | 3.87100700  | -1.12093700 | -0.76215700 |
| O         | -0.51954300 | 1.46349200  | 0.52555000  |
| C         | 0.42506500  | 2.52042800  | 0.64193200  |
| O         | 1.11007600  | 2.53173200  | 1.68977700  |
| O         | 0.40650600  | 3.34808300  | -0.30426100 |
| C         | -3.29864100 | -0.38796000 | 1.19093700  |
| H         | -4.31574400 | -0.71554200 | 0.94375400  |
| H         | -3.21153200 | -0.36971000 | 2.28422200  |
| H         | -3.15429600 | 0.63495200  | 0.83108200  |
| C         | -2.46661700 | -2.75043700 | 1.16122400  |
| H         | -2.53455700 | -2.72327000 | 2.25583600  |
| H         | -3.40725700 | -3.16898100 | 0.78094600  |
| H         | -1.65170500 | -3.42750300 | 0.89143600  |

|              |             |             |             |
|--------------|-------------|-------------|-------------|
| C            | -3.43663700 | -0.99916400 | -1.67502200 |
| H            | -3.26422600 | -0.94042600 | -2.75691400 |
| H            | -4.14700900 | -1.81596300 | -1.49735300 |
| H            | -3.90692500 | -0.06529600 | -1.34951200 |
| C            | -1.42704300 | -2.48323000 | -1.57287200 |
| H            | -2.07034700 | -3.37057300 | -1.53224700 |
| H            | -1.20383300 | -2.27020600 | -2.62441100 |
| H            | -0.48200800 | -2.71165100 | -1.07398800 |
| K            | 0.53050600  | 0.37485100  | 2.90416900  |
| K            | -1.43635500 | 2.42257800  | -1.81179000 |
| H            | 3.48418800  | -2.87063400 | 0.42045900  |
| H            | 4.04885700  | 0.69473300  | -1.89540200 |
| H            | 1.72690800  | 1.39270000  | -1.41491200 |
| H            | 1.12348700  | -2.19930600 | 0.87048700  |
| F            | 5.16001700  | -1.49300800 | -1.02022500 |
| <b>27-ts</b> |             |             |             |
| C            | -0.45211200 | 2.61635100  | -0.76955600 |
| C            | 0.17186100  | 2.50828700  | 0.69199400  |
| O            | 0.54912300  | 1.11016900  | 0.78927700  |
| O            | 0.13014300  | 1.47413200  | -1.45086400 |
| B            | 0.57829100  | 0.59693200  | -0.48869700 |
| C            | -1.66393800 | -1.02537100 | -0.13635900 |
| C            | -2.67254500 | -1.26542800 | -1.10426100 |
| C            | -2.15766200 | -0.99726200 | 1.19204500  |
| C            | -4.03722900 | -1.44876200 | -0.80865900 |
| C            | -3.50866200 | -1.17343700 | 1.54368200  |
| C            | -4.42354400 | -1.39755300 | 0.52319800  |
| O            | 1.37806800  | -0.50392800 | -0.85788200 |
| C            | 2.61560600  | -0.77923000 | -0.33904000 |
| O            | 3.38959600  | 0.15571700  | -0.03187800 |
| O            | 2.87449100  | -2.03087100 | -0.25088300 |
| C            | 1.46446300  | 3.32017600  | 0.87248500  |
| H            | 1.27256800  | 4.39934000  | 0.84605600  |
| H            | 1.90039400  | 3.07172000  | 1.84642000  |
| H            | 2.20395600  | 3.06948600  | 0.10618600  |
| C            | -0.80266000 | 2.82700900  | 1.82673400  |
| H            | -0.29603000 | 2.69313900  | 2.78948700  |
| H            | -1.14687300 | 3.86705100  | 1.76776300  |
| H            | -1.67208900 | 2.16644700  | 1.80733900  |
| C            | -0.04577500 | 3.87432400  | -1.54236800 |
| H            | -0.48843400 | 3.84068800  | -2.54390900 |
| H            | -0.41255900 | 4.77843800  | -1.04072100 |
| H            | 1.03860600  | 3.95140200  | -1.65651000 |
| C            | -1.97841700 | 2.46521700  | -0.80806400 |
| H            | -2.47508700 | 3.32805200  | -0.34856900 |



|           |             |             |             |
|-----------|-------------|-------------|-------------|
| H         | -2.29808400 | 2.40358300  | -1.85415800 |
| H         | -2.30498300 | 1.55134100  | -0.30891500 |
| K         | 5.19068900  | -1.44307800 | 0.76705700  |
| K         | 0.30508400  | -2.86782000 | -0.75739100 |
| H         | -4.78404700 | -1.61584600 | -1.58272100 |
| H         | -3.85118500 | -1.13486900 | 2.57627100  |
| H         | -1.46299700 | -0.79878700 | 2.01325800  |
| H         | -2.40712700 | -1.28090500 | -2.16741600 |
| F         | -5.75053800 | -1.57283900 | 0.84186900  |
| <b>28</b> |             |             |             |
| C         | -2.59640000 | -1.20318400 | -0.35307100 |
| C         | -2.79583400 | -0.48706500 | 1.04172800  |
| O         | -1.52667900 | 0.07929200  | 1.27191000  |
| O         | -1.71079200 | -0.34550600 | -1.02649500 |
| B         | -0.94434400 | 0.49788200  | -0.05378700 |
| C         | 0.69080200  | 0.08292100  | 0.00501800  |
| C         | 1.36716800  | -0.72112500 | -0.91550400 |
| C         | 1.48846900  | 0.53253200  | 1.06024600  |
| C         | 2.71985600  | -1.04701500 | -0.81232100 |
| C         | 2.84315800  | 0.23361000  | 1.20071500  |
| C         | 3.46921000  | -0.56569500 | 0.25343200  |
| O         | -1.13974900 | 1.90929100  | -0.26682700 |
| C         | -0.50416600 | 2.70172500  | -1.24093100 |
| O         | -1.01218500 | 3.84392500  | -1.38602600 |
| O         | 0.49065400  | 2.20154300  | -1.83548900 |
| C         | -3.85752900 | 0.63740800  | 0.97698200  |
| H         | -4.87823500 | 0.24481500  | 0.84550300  |
| H         | -3.82002600 | 1.20059300  | 1.91830700  |
| H         | -3.61901700 | 1.33524300  | 0.16967300  |
| C         | -3.14214500 | -1.42864800 | 2.20799100  |
| H         | -3.25052900 | -0.84125800 | 3.12987800  |
| H         | -4.08830300 | -1.96286800 | 2.03030500  |
| H         | -2.34851400 | -2.16433800 | 2.37395800  |
| C         | -3.87947800 | -1.35459300 | -1.18924900 |
| H         | -3.64078900 | -1.85983400 | -2.13502900 |
| H         | -4.64151300 | -1.95135500 | -0.66375400 |
| H         | -4.30039200 | -0.37501900 | -1.43311400 |
| C         | -1.94105000 | -2.59970100 | -0.20371500 |
| H         | -2.62491400 | -3.34645300 | 0.22954500  |
| H         | -1.63191400 | -2.94341200 | -1.19822700 |
| H         | -1.04507200 | -2.53732000 | 0.42246000  |
| F         | 0.74291700  | -1.24545800 | -1.99780900 |
| F         | 3.33030000  | -1.83816600 | -1.74267900 |
| F         | 4.78971800  | -0.88516000 | 0.37577000  |
| F         | 3.56950700  | 0.70175500  | 2.25734200  |

|              |             |             |             |
|--------------|-------------|-------------|-------------|
| F            | 0.97073400  | 1.32440800  | 2.03347800  |
| <b>29-ts</b> |             |             |             |
| C            | -2.27974700 | -1.44925100 | -0.64061000 |
| C            | -2.62142500 | -1.08127600 | 0.86676200  |
| O            | -1.71118400 | -0.02536800 | 1.15269300  |
| O            | -1.73768700 | -0.23876500 | -1.14817400 |
| B            | -1.28353300 | 0.56673800  | -0.07050900 |
| C            | 1.01945200  | 0.05342700  | 0.00505600  |
| C            | 1.78095400  | -0.12407800 | -1.13435700 |
| C            | 1.76034600  | 0.14496700  | 1.16826600  |
| C            | 3.17376900  | -0.20188000 | -1.15482700 |
| C            | 3.15281700  | 0.07625500  | 1.22821600  |
| C            | 3.86715500  | -0.09736700 | 0.04692100  |
| O            | -1.04793100 | 1.92028400  | -0.21960500 |
| C            | -2.13246400 | 2.86548000  | -0.32801800 |
| O            | -3.29300200 | 2.38397500  | -0.28667000 |
| O            | -1.75275500 | 4.04719200  | -0.44968200 |
| C            | -4.04774900 | -0.52136200 | 1.04301900  |
| H            | -4.82118500 | -1.27701600 | 0.83750400  |
| H            | -4.15944900 | -0.18755600 | 2.08286000  |
| H            | -4.18315000 | 0.35781800  | 0.40405700  |
| C            | -2.39032700 | -2.22097600 | 1.87102400  |
| H            | -2.61004900 | -1.85638700 | 2.88253600  |
| H            | -3.05034700 | -3.07710500 | 1.66506600  |
| H            | -1.35159400 | -2.56331700 | 1.85913600  |
| C            | -3.49951700 | -1.82370100 | -1.49604100 |
| H            | -3.16935300 | -2.03790000 | -2.52095200 |
| H            | -4.00660500 | -2.71805600 | -1.10433400 |
| H            | -4.21302400 | -0.99652800 | -1.53730000 |
| C            | -1.21512100 | -2.55828200 | -0.77314900 |
| H            | -1.60046700 | -3.53956600 | -0.45937200 |
| H            | -0.90943800 | -2.62164900 | -1.82444200 |
| H            | -0.32536000 | -2.31441600 | -0.18708400 |
| F            | 1.18458100  | -0.25682600 | -2.37187400 |
| F            | 3.89216600  | -0.38472500 | -2.31071200 |
| F            | 5.23204200  | -0.17074100 | 0.06770100  |
| F            | 3.85165600  | 0.16588400  | 2.40680200  |
| F            | 1.14503200  | 0.30504400  | 2.39172600  |
| <b>30</b>    |             |             |             |
| C            | -1.65964000 | -0.64237800 | -0.15132900 |
| C            | -1.19571600 | 0.81906300  | 0.23147700  |
| O            | -0.45551700 | -1.21579200 | -0.68159800 |
| O            | 0.18906400  | 0.62403300  | 0.54803400  |
| B            | 0.64278300  | -0.51073900 | -0.14208700 |
| O            | 1.89331500  | -0.93621500 | -0.26181800 |

|              |             |             |             |
|--------------|-------------|-------------|-------------|
| C            | 3.11636100  | -0.01039400 | -0.03371000 |
| O            | 3.86114000  | -0.45826300 | 0.83581300  |
| O            | 3.11509400  | 0.95579000  | -0.79936800 |
| C            | -1.26608000 | 1.80260700  | -0.95038500 |
| H            | -2.30105700 | 2.05759200  | -1.21276000 |
| H            | -0.73872700 | 2.72083600  | -0.67068100 |
| H            | -0.76666300 | 1.39365300  | -1.83460400 |
| C            | -1.89938100 | 1.42654300  | 1.44791700  |
| H            | -1.48845600 | 2.42338800  | 1.64504700  |
| H            | -2.97857100 | 1.52973300  | 1.27190500  |
| H            | -1.74542000 | 0.81938300  | 2.34403200  |
| C            | -2.75503700 | -0.71627900 | -1.21871700 |
| H            | -2.99040900 | -1.76625100 | -1.43021800 |
| H            | -3.67491800 | -0.22207500 | -0.87838400 |
| H            | -2.43233400 | -0.25103000 | -2.15395800 |
| C            | -2.07437400 | -1.47941700 | 1.07260900  |
| H            | -3.02741500 | -1.14146300 | 1.49926100  |
| H            | -2.18439600 | -2.52471400 | 0.76212900  |
| H            | -1.30712500 | -1.44024600 | 1.85298400  |
| <b>31</b>    |             |             |             |
| C            | -1.20366400 | 0.37401300  | 0.00006500  |
| C            | -1.15470000 | -1.01887200 | 0.00022700  |
| C            | 0.00000000  | -1.76188400 | 0.00001000  |
| C            | 1.15470100  | -1.01887300 | -0.00019300 |
| C            | 1.20366400  | 0.37401300  | -0.00003600 |
| C            | 0.00000000  | 1.07647500  | 0.00001200  |
| F            | 2.37562900  | 1.08460400  | 0.00006600  |
| F            | 0.00000000  | 2.43947900  | -0.00000600 |
| F            | -2.37562900 | 1.08460400  | -0.00006600 |
| F            | -2.40160600 | -1.64596700 | -0.00013800 |
| F            | 2.40160500  | -1.64596700 | 0.00008800  |
| <b>32-ts</b> |             |             |             |
| C            | 2.15407200  | -1.31467300 | -0.23889700 |
| C            | 0.85791200  | -1.08848800 | 0.22299700  |
| C            | 0.35956300  | 0.16798600  | 0.50722400  |
| C            | 1.23236200  | 1.21344000  | 0.29821400  |
| C            | 2.54056200  | 1.05949100  | -0.15818000 |
| C            | 3.00307500  | -0.22577800 | -0.42648600 |
| C            | -1.45152300 | 0.43034700  | 1.60914200  |
| H            | -1.17504000 | 1.49028400  | 1.76167300  |
| C            | -2.41693600 | 0.26099600  | 0.44882400  |
| C            | -3.15807800 | -0.91997800 | 0.31828400  |
| C            | -2.64315700 | 1.30625900  | -0.45743600 |
| C            | -4.09085200 | -1.06243600 | -0.71243200 |
| H            | -2.98075900 | -1.71309800 | 1.03933800  |

|              |             |             |             |
|--------------|-------------|-------------|-------------|
| C            | -3.57940500 | 1.17155200  | -1.48560400 |
| H            | -2.06506700 | 2.22420600  | -0.35920000 |
| C            | -4.30710000 | -0.01778300 | -1.61965200 |
| H            | -4.65423700 | -1.98940300 | -0.80895800 |
| H            | -3.74145500 | 1.99110800  | -2.18404900 |
| H            | -5.03515600 | -0.12769200 | -2.42145400 |
| F            | 0.83007000  | 2.51485800  | 0.53023500  |
| F            | 3.37716100  | 2.11717000  | -0.35042600 |
| F            | 4.27046100  | -0.41695900 | -0.87193700 |
| F            | 2.61772800  | -2.56342500 | -0.51954700 |
| F            | 0.07524900  | -2.20178500 | 0.37371500  |
| O            | -1.48590900 | -0.35122000 | 2.58478800  |
| <b>33</b>    |             |             |             |
| C            | -1.84919400 | 1.43657800  | 0.03808500  |
| C            | -0.59573400 | 0.90880200  | 0.33214900  |
| C            | -0.33167200 | -0.46615300 | 0.34194700  |
| C            | -1.41702000 | -1.28084500 | 0.01492600  |
| C            | -2.68849900 | -0.78784100 | -0.27526000 |
| C            | -2.90985400 | 0.58353600  | -0.25965700 |
| C            | 1.00728900  | -1.06771000 | 0.94136100  |
| H            | 0.98035600  | -2.13985700 | 0.61835500  |
| C            | 2.22795600  | -0.48587200 | 0.17343000  |
| C            | 3.24404100  | 0.13810400  | 0.90332300  |
| C            | 2.38652000  | -0.63012400 | -1.21190300 |
| C            | 4.39141700  | 0.61938000  | 0.26325900  |
| H            | 3.08985600  | 0.22604500  | 1.97615000  |
| C            | 3.52900400  | -0.14965400 | -1.86015600 |
| H            | 1.60624500  | -1.12568900 | -1.79081600 |
| C            | 4.53976200  | 0.47987500  | -1.12187400 |
| H            | 5.17414100  | 1.10587300  | 0.84469800  |
| H            | 3.63324700  | -0.26556900 | -2.93849500 |
| H            | 5.43183200  | 0.85428900  | -1.62174600 |
| F            | -1.27284100 | -2.63213400 | -0.04697000 |
| F            | -3.70870900 | -1.62575000 | -0.58356700 |
| F            | -4.13713500 | 1.08587900  | -0.53171300 |
| F            | -2.05588000 | 2.77557000  | 0.02574400  |
| F            | 0.38163200  | 1.80028300  | 0.60083800  |
| O            | 1.00208000  | -0.88477000 | 2.25688600  |
| <b>34-ts</b> |             |             |             |
| C            | -2.43523700 | -2.35826100 | -0.70621800 |
| C            | -2.70331900 | -2.04640400 | 0.83127500  |
| O            | -2.64685300 | -1.09213300 | -1.32598500 |
| O            | -2.43337500 | -0.64792800 | 0.93246900  |
| B            | -2.52030600 | -0.07952200 | -0.35814800 |
| O            | -2.89482800 | 1.22202000  | -0.60021000 |

|   |             |             |             |
|---|-------------|-------------|-------------|
| C | -4.29070300 | 1.60469500  | -0.56335800 |
| O | -4.47713700 | 2.81156300  | -0.81115400 |
| O | -5.10008700 | 0.68492200  | -0.29272500 |
| C | -4.17685500 | -2.24566600 | 1.24003700  |
| H | -4.48513800 | -3.30018100 | 1.18750700  |
| H | -4.29614700 | -1.90223100 | 2.27560000  |
| H | -4.82780200 | -1.62494300 | 0.61568000  |
| C | -1.78964200 | -2.80318000 | 1.80321600  |
| H | -2.02607600 | -2.50030800 | 2.83126800  |
| H | -1.93850500 | -3.89021400 | 1.72504800  |
| H | -0.73597300 | -2.57688700 | 1.62226600  |
| C | -3.41563000 | -3.36483200 | -1.32662000 |
| H | -3.17937800 | -3.48578200 | -2.39164800 |
| H | -3.33520600 | -4.35038000 | -0.84487200 |
| H | -4.44783700 | -3.01263900 | -1.24869200 |
| C | -0.99075400 | -2.80225300 | -1.00422600 |
| H | -0.74907500 | -3.76994900 | -0.54176600 |
| H | -0.87641600 | -2.90057300 | -2.09168400 |
| H | -0.29354700 | -2.02755600 | -0.67256500 |
| C | 3.86698700  | -0.32370100 | -1.21896900 |
| C | 2.70959100  | 0.38579900  | -0.91382900 |
| C | 1.91518000  | 0.09655300  | 0.20551600  |
| C | 2.38236200  | -0.94149400 | 1.01339200  |
| C | 3.53182800  | -1.67936200 | 0.72954900  |
| C | 4.27960300  | -1.37223700 | -0.39884800 |
| C | 0.49185000  | 0.74570400  | 0.39579100  |
| H | 0.15322400  | 0.40522300  | 1.40223400  |
| C | 0.62465500  | 2.28484500  | 0.52883200  |
| C | -0.35396400 | 3.09308300  | -0.06484100 |
| C | 1.63700000  | 2.89349400  | 1.28600400  |
| C | -0.30942100 | 4.48296700  | 0.09271400  |
| H | -1.16082700 | 2.61058200  | -0.61152800 |
| C | 1.69114100  | 4.28419000  | 1.43492300  |
| H | 2.39756400  | 2.27583700  | 1.76537800  |
| C | 0.71390500  | 5.08721900  | 0.83374100  |
| H | -1.09209800 | 5.09045000  | -0.35803300 |
| H | 2.49266100  | 4.73854300  | 2.01850600  |
| H | 0.74582900  | 6.17048200  | 0.95057600  |
| F | 1.72614600  | -1.27848800 | 2.15539200  |
| F | 3.93986100  | -2.68398900 | 1.54758900  |
| F | 5.39826600  | -2.07967800 | -0.69947600 |
| F | 4.61702400  | -0.00355300 | -2.30395700 |
| F | 2.38968500  | 1.39438000  | -1.74544200 |
| O | -0.27947300 | 0.29444700  | -0.60464200 |

|   |             |             |             |
|---|-------------|-------------|-------------|
| C | 3.17789600  | 0.05272200  | -1.53301500 |
| C | 2.83728200  | 1.27642100  | -0.57184700 |
| O | 2.74973800  | -1.07358400 | -0.80513600 |
| O | 1.74129200  | 0.79911600  | 0.18003800  |
| B | 1.70472300  | -0.69858700 | 0.15506000  |
| O | 1.70023300  | -1.36718100 | 1.42563100  |
| C | 2.69738400  | -1.47131500 | 2.41721300  |
| O | 2.31754000  | -2.09144200 | 3.44404800  |
| O | 3.82471800  | -0.96157900 | 2.18115200  |
| C | 3.99231500  | 1.62117000  | 0.39199900  |
| H | 4.87645400  | 2.01254800  | -0.13661900 |
| H | 3.63878300  | 2.39671600  | 1.08608700  |
| H | 4.25050100  | 0.73834000  | 0.98892600  |
| C | 2.41261600  | 2.55883700  | -1.31425100 |
| H | 2.16712000  | 3.33423900  | -0.57610900 |
| H | 3.22199900  | 2.94437900  | -1.95341900 |
| H | 1.52545100  | 2.39354200  | -1.93436400 |
| C | 4.67610100  | -0.11024500 | -1.84256200 |
| H | 4.81770100  | -0.98075000 | -2.49853000 |
| H | 5.08698500  | 0.77414500  | -2.35377500 |
| H | 5.23746500  | -0.28742900 | -0.92133000 |
| C | 2.39743900  | 0.10596100  | -2.86998800 |
| H | 2.72241600  | 0.93324400  | -3.51959400 |
| H | 2.56610400  | -0.83917300 | -3.40339900 |
| H | 1.32303200  | 0.19302100  | -2.68385200 |
| C | -2.34071200 | 2.18533100  | -0.97670400 |
| C | -1.83368600 | 0.89091700  | -0.91661700 |
| C | -1.44417600 | 0.28834300  | 0.28400700  |
| C | -1.61443700 | 1.05756700  | 1.43595700  |
| C | -2.11914100 | 2.35828900  | 1.40621000  |
| C | -2.47923000 | 2.92756900  | 0.19211700  |
| C | -0.76484100 | -1.10603600 | 0.31167900  |
| H | -0.47889100 | -1.30652200 | 1.35629400  |
| C | -1.75524500 | -2.19836200 | -0.11164300 |
| C | -1.34095800 | -3.18899300 | -1.01122700 |
| C | -3.05028500 | -2.27727300 | 0.42235500  |
| C | -2.20402200 | -4.22751100 | -1.37427100 |
| H | -0.33151500 | -3.11425300 | -1.40376600 |
| C | -3.91628700 | -3.31438400 | 0.06209500  |
| H | -3.38479500 | -1.52303800 | 1.13290900  |
| C | -3.49700600 | -4.29667900 | -0.84269000 |
| H | -1.86335400 | -4.98976500 | -2.07389300 |
| H | -4.91697600 | -3.35707600 | 0.49072900  |
| H | -4.16814900 | -5.10680800 | -1.12501300 |
| F | -1.31612900 | 0.55325900  | 2.64806000  |

|   |             |             |             |
|---|-------------|-------------|-------------|
| F | -2.27607200 | 3.06988700  | 2.54694000  |
| F | -2.97822200 | 4.18587400  | 0.14523000  |
| F | -2.71629800 | 2.73175200  | -2.15876700 |
| F | -1.74802300 | 0.22031600  | -2.08151600 |
| O | 0.35556800  | -1.10110500 | -0.48811000 |

## VIII. Investigation of the Reaction Mechanism

### (a) Reactivity test of acetophenone with pentafluorophenyl-Bpin and $K_2CO_3$

A mixture of acetophenone (0.04 mmol, 4.8 mg), pentafluorophenyl-Bpin (0.04 mmol, 6.7 mg) and  $K_2CO_3$  (0.04 mmol, 5.5 mg, 1 equiv.) was dissolved in 0.7 mL  $C_6D_6$  in a Young's tap NMR tube. The  $^1H$  and  $^{11}B$  NMR spectra of the mixture were recorded immediately. Then, the mixture was heated at 120 °C for 4 h. They subsequently were studied by  $^1H$  and  $^{11}B$  NMR spectra, which revealed that the formation of product **3s-2** was observed.

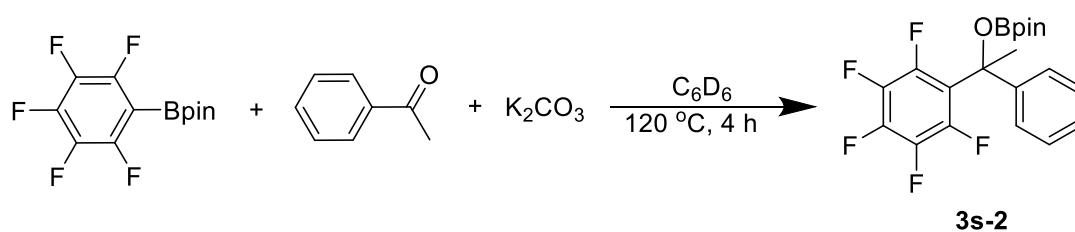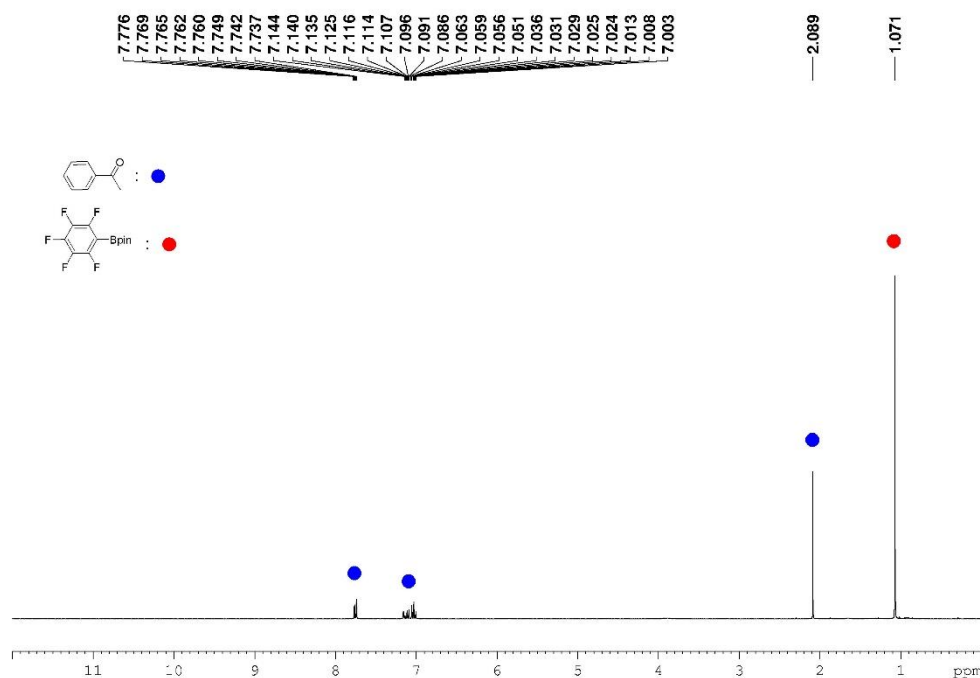

**Figure S10.**  $^1H$  NMR spectrum at 0 min (300 MHz,  $C_6D_6$ ).





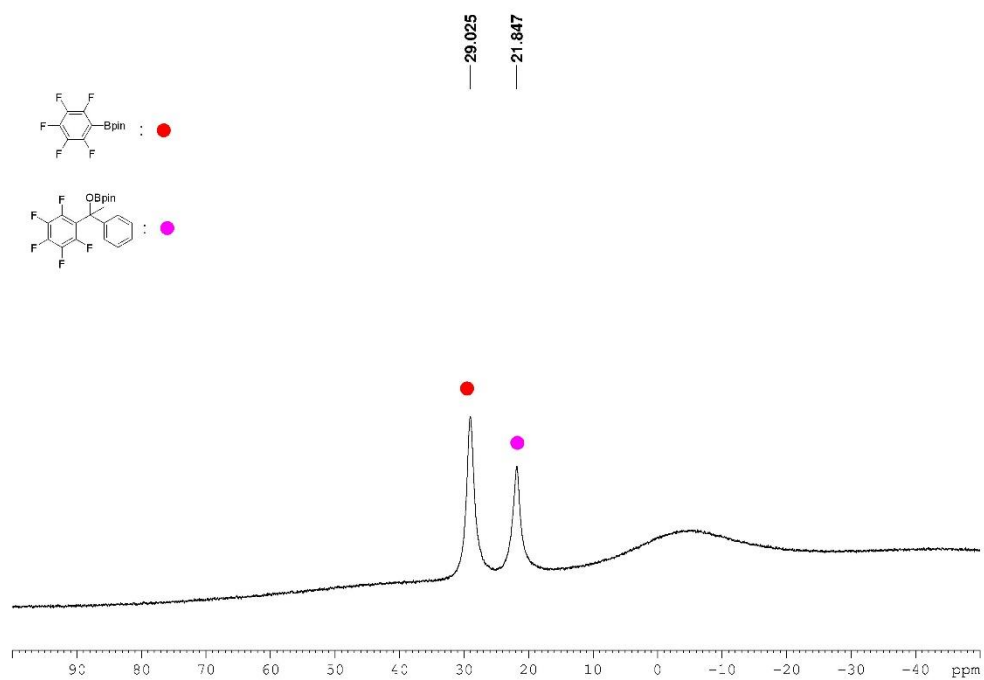

**Figure S13.**  $^{11}\text{B}$  NMR spectrum after 4 h heating (96 MHz,  $\text{C}_6\text{D}_6$ ).

# HRMS data of intermediate D

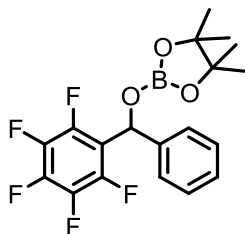

Formula: C<sub>19</sub>H<sub>18</sub>BF<sub>5</sub>O<sub>3</sub>  
 Exact Mass: 400.1269  
 Found: 400.1263

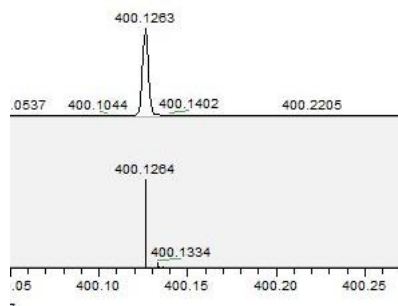

HIAK Marder...IQZ-1QZ-1-2019-10-08-1  
 LIFDI

10/08/19 10:29:51

QZ-1

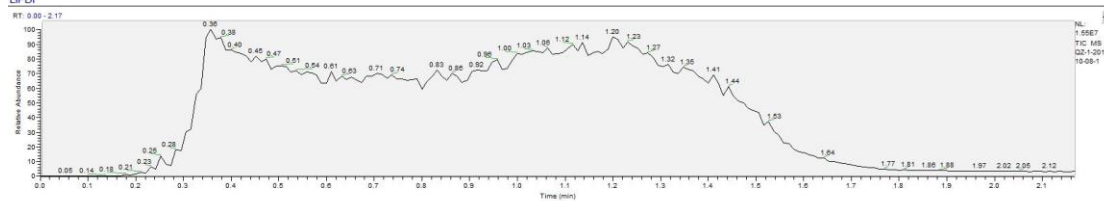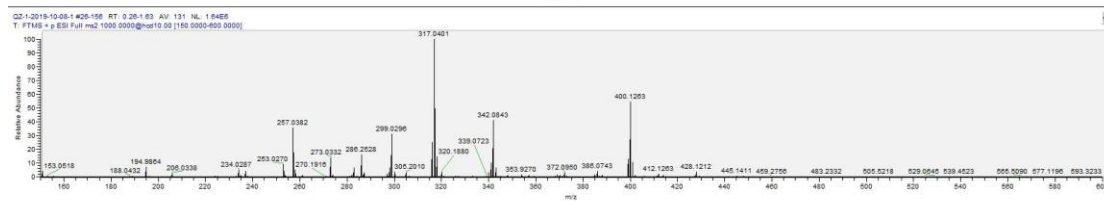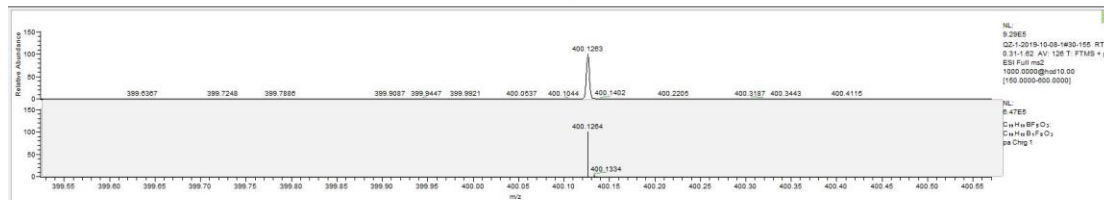

## IX. References

- [1] a) T. Ishiyama, J. Takagi, K. Ishida, N. Miyaura, N. R. Anastasi, J. F. Hartwig, *J. Am. Chem. Soc.* **2002**, *124*, 390-391; b) T. Ishiyama, J. Takagi, K. Ishida, N. Miyaura, J. F. A Hartwig, *Angew. Chem. Int. Ed.* **2002**, *41*, 3056-3058; c) Y. P. Budiman, A. Friedrich, U. Radius, T. B. Marder, *ChemCatChem* **2019**, *11*, 5387-5396.
- [2] G.-F. Du, F. Xing, C.-Z. Gu, B. Dai, L. He, *RSC Adv.* **2015**, *5*, 35513-35517.
- [3] M.-T. Meng, K. Cheng, *J. Org. Chem.* **2018**, *83*, 3275-3284.
- [4] S. Chang, J. Wang, L. Dong, D. Wang, B. Feng, Y. Shi, *RSC Adv.* **2017**, *7*, 51928-51934.
- [5] P. Lei, Y. Ling, M. Szostak, *J. Org. Chem.* **2017**, *82*, 6638-6646.
- [6] M.-Z. Li, C. Wang, H. Ge, *Org. Lett.* **2011**, *13*, 2062-2064.
- [7] a) G. M. Sheldrick, *Acta Crystallogr. Sect. A: Found. Crystallogr.* **2008**, *64*, 112-122; b) C. B. Hübschle, G. M. Sheldrick, B. Dittrich, *J. Appl. Crystallogr.* **2011**, *44*, 1281-1284; c) G. M. Sheldrick, *Acta Crystallogr. Sect. C: Struct. Chem.* **2015**, *71*, 3-8; d) G. M. Sheldrick, *Acta Crystallogr. Sect. A: Found. Adv.* **2015**, *71*, 3-8.
- [8] B. Moulton, M. J. Zaworotko, *Chem. Rev.* **2001**, *101*, 1629-1658.
- [9] M. J. Frisch, G. W. Trucks, H. B. Schlegel, G. E. Scuseria, M. A. Robb, J. R. Cheeseman, G. Scalmani, V. Barone, B. Mennucci, G. A. Petersson, H. Nakatsuji, M. Caricato, X. Li, H. P. Hratchian, A. F. Izmaylov, J. Bloino, G. Zheng, J. L. Sonnenberg, M. Hada, M. Ehara, K. Toyota, R. Fukuda, J. Hasegawa, M. Ishida, T. Nakajima, Y. Honda, O. Kitao, H. Nakai, T. Vreven, Jr. J. A. Montgomery, J. E. Peralta, F. Ogliaro, M. Bearpark, J. J. Heyd, E. Brothers, K. N. Kudin, V. N. Staroverov, T. Keith, R. Kobayashi, J. Normand, K. Raghavachari, A. Rendell, J. C. Burant, S. S. Iyengar, J. Tomasi, M. Cossi, N. Rega, J. M. Millam, M. Klene, J. E. Knox, J. B. Cross, V. Bakken, C. Adamo, J. Jaramillo, R. Gomperts, R. E. Stratmann, O. Yazyev, A. J. Austin, R. Cammi, C. Pomelli, J. W. Ochterski, R. L. Martin, K. Morokuma, V. G. Zakrzewski, G. A. Voth, P. Salvador, J. J. Dannenberg, S. Dapprich, A. D. Daniels, O. Farkas, J. B. Foresman, J. V. Ortiz, J. Cioslowski, and D. J. Fox, Gaussian 09, revision E.01; Gaussian, Inc.: Wallingford, CT, **2013**.

- [10] A. D. Becke, *J. Chem. Phys.* **1993**, *98*, 5648-5652.
- [11] C. Lee, W. Yang, R. G. Parr, *Phys. Rev. B: Condens. Matter* **1988**, *37*, 785-789.
- [12] K. Fukui, *Acc. Chem. Res.* **2002**, *14*, 363-368.
- [13] E. Cancès, B. Mennucci, J. Tomasi, *J. Chem. Phys.* **1997**, *107*, 3032-3041.
- [14] M. Cossi, V. Barone, R. Cammi, J. Tomasi, *Chem. Phys. Lett.* **1996**, *255*, 327-335.
- [15] A. V. Marenich, C. J. Cramer, D. G. Truhlar, *J. Phys. Chem. B* **2009**, *113*, 6378-6396.
- [16] Y. Zhao, D. G. Truhlar, *Acc. Chem. Res.* **2008**, *41*, 157-167.
- [17] C.Y. Legault, CYLView, Université de Sherbrooke, Canada, **2009**.
